# Supplementary material for: Difluorocarbene-based cyanodifluoromethylation of alkenes induced by a dual-functional Cu-catalyst
Source: Royal Society of Chemistry journal article supplement (doi:10.1039/d1cc00160d), 2021-01-01

## Supporting Information

### Difluorocarbene-based Cyanodifluoromethylation of Alkenes Induced by a Dual-Functional Cu-catalyst

Min Zhang,<sup>a</sup> Jin-Hong Lin,<sup>a</sup> Chuan-Ming Jin<sup>\*b</sup>, and Ji-Chang Xiao<sup>\*a</sup>

<sup>a</sup>*Key Laboratory of Organofluorine Chemistry, Shanghai Institute of Organic Chemistry, University of Chinese Academy of Sciences, Chinese Academy of Sciences, 345 Lingling Road, Shanghai 200032, China.*

Fax: (+86) 21-6416-6128; Tel: (+86)21-5492-5340; E-mail: [jchxiao@sioc.ac.cn](mailto:jchxiao@sioc.ac.cn)

<sup>b</sup>*Department of Chemistry and Chemical Engineering, Hubei Normal University, 11 Cihu Road, 435002, Huangshi, Hubei, China*

Tel: (+86)-714 -6515602; E-mail: [cmjin@hbnu.edu.cn](mailto:cmjin@hbnu.edu.cn)

#### Table of Contents

|                                                                                                        |     |
|--------------------------------------------------------------------------------------------------------|-----|
| 1. General Information .....                                                                           | S2  |
| 2. Screening of Ligand .....                                                                           | S2  |
| 3. General Procedures for Difluorocarbene-based Cyanodifluoromethylation of Alkenes .....              | S3  |
| 4. Preliminary Mechanistic Studies .....                                                               | S15 |
| 4.1 Cyanide Detection Test with Picric Acid Paper .....                                                | S15 |
| 4.2 The Exclusion of the Path Involving .....                                                          | S16 |
| 4.3 Radical Trapping Experiments .....                                                                 | S18 |
| 4.4 UV-Vis Absorption Experiment .....                                                                 | S19 |
| 4.5 Stern–Volmer Measurements .....                                                                    | S20 |
| 5. The Transformations of <b>4a</b> .....                                                              | S21 |
| 6. References .....                                                                                    | S23 |
| 7. Copies of <sup>1</sup> H NMR, <sup>19</sup> F NMR and <sup>13</sup> C NMR Spectra of Products ..... | S25 |

## 1. General Information

$^1\text{H}$ ,  $^{13}\text{C}$  and  $^{19}\text{F}$  NMR spectra were detected on a 500 MHz, 400 MHz or 300 MHz NMR spectrometer. Data for  $^1\text{H}$  NMR,  $^{13}\text{C}$  NMR and  $^{19}\text{F}$  NMR were recorded as follows: chemical shift ( $\delta$ , ppm), multiplicity (s = singlet, d = doublet, t = triplet, m = multiplet, q = quartet, coupling constant (s) in Hz). Mass spectra were obtained on GC-MS or LC-MS (ESI). High resolution mass data were recorded on a high resolution mass spectrometer in the EI, FI or ESI mode. The mass analyzer types for HRMS-EI, HRMS-FI and HRMS-ESI are time-of-flight and Fourier transform mass spectrometer, respectively. Unless otherwise noted, all reagents were obtained commercially and used without further purification.

## 2. Screening of Ligand

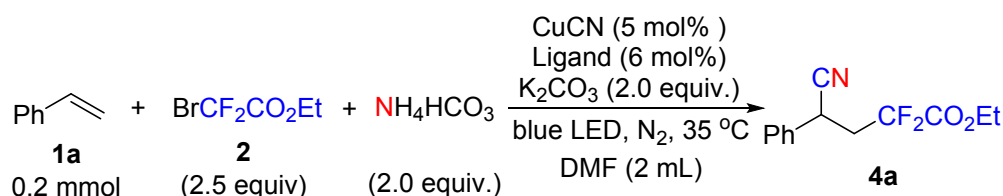

| Entry          | Ligand             | Yield (%) <sup>b</sup> |
|----------------|--------------------|------------------------|
| 1              | BINAP              | 85                     |
| 2              | L1                 | 25                     |
| 3              | L2                 | 60                     |
| 4              | L3                 | 25                     |
| 5              | L4                 | 0                      |
| 6 <sup>c</sup> | ( <i>S</i> )-BINAP | 65 <sup>d</sup>        |

<sup>a</sup>Reaction conditions: Substrate **1a** (0.2 mmol),  $\text{BrCF}_2\text{CO}_2\text{Et}$  (2.5 equiv),  $\text{NH}_4\text{HCO}_3$  (2 equiv),  $\text{CuCN}$  (5 mmol%), BINAP (6 mmol%),  $\text{K}_3\text{PO}_4$  (2 equiv), DG (2.5 equiv) and  $\text{H}_2\text{O}$  (3 equivl) in DMF (2 mL) irradiated with blue LEDs at  $35^\circ\text{C}$  under a  $\text{N}_2$  atmosphere for 12 h; <sup>b</sup>The yields were determined by  $^{19}\text{F}$  NMR spectroscopy with 1-fluoronaphthalene as the internal standard; <sup>c</sup>(*S*)-BINAP and  $\text{CuCN}$  were stirred in 1mL DMF under  $\text{N}_2$  atmosphere for 30 min, then add other reagent; <sup>d</sup>No enantioselectivity.

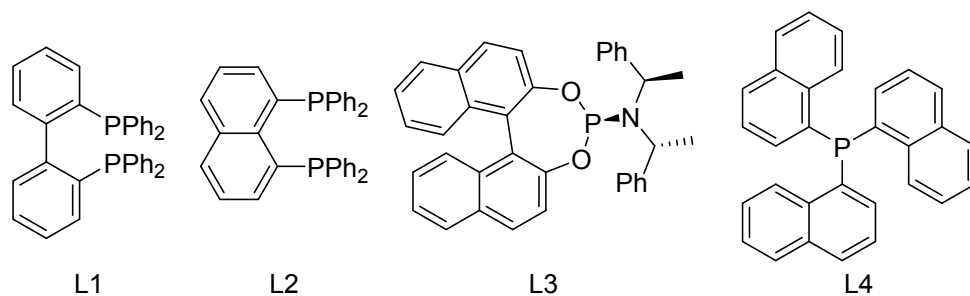

### 3. General Procedures for Cyanodifluoromethylation of Alkenes

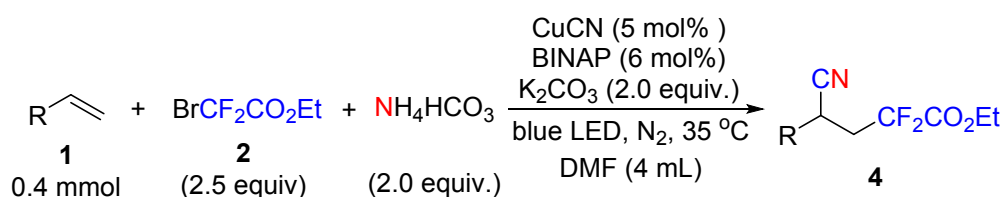

Into a 15 mL Schlenk tube were added CuCN (1.8 mg, 0.02 mmol, 5 mol %), BINAP (14.9 mg, 0.024 mmol, 6 mol %), NH<sub>4</sub>HCO<sub>3</sub> (63.2 mg, 0.8 mmol, 2 equiv.), K<sub>3</sub>PO<sub>4</sub> (169.8 mg, 0.8 mmol, 2 equiv.) and DMF (4 mL) under a N<sub>2</sub> atmosphere. Then substrate **1** (0.4 mmol, 1.0 equiv.), BrCF<sub>2</sub>CO<sub>2</sub>Et (203.0 mg, 1.0 mmol, 2.5 equiv.), DG (134.2 mg, 1.0 mmol, 2.5 equiv.) and H<sub>2</sub>O (21.6 mg, 1.2 mmol, 3 equiv.) were added. The resulting mixture was stirred at 35 °C under the irradiation of 11.5 W blue LEDs for 12 h under a N<sub>2</sub> atmosphere. When the reaction was completed, as monitored by <sup>19</sup>F NMR spectroscopy, the crude reaction mixture was diluted with EA (20 mL). The solution was washed with water (3×20 mL) and brine (20 mL), and then dried over anhydrous Na<sub>2</sub>SO<sub>4</sub> and evaporated under reduced pressure. The residue was subjected to flash column chromatography to give the final product **4**.

#### Ethyl 4-cyano-2,2-difluoro-4-phenylbutanoate (**4a**)

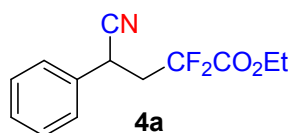

80.3 mg, 79% yield; yellow oil; <sup>1</sup>H NMR (400 MHz, CDCl<sub>3</sub>) δ 7.47 – 7.32 (m, 5H), 4.34 – 4.19 (m, 2H), 4.12 (dd, *J* = 9.3, 5.0 Hz, 1H), 2.84 (ddd, *J* = 30.7, 15.3, 9.4 Hz, 1H), 2.59 (ddd, *J* = 31.0, 15.2, 5.0 Hz, 1H), 1.33 (t, *J* = 7.1 Hz, 3H); <sup>19</sup>F NMR (376 MHz, CDCl<sub>3</sub>) δ -104.89 (dt, *J* = 268.5, 15.5 Hz, 1F), -105.62 (dt, *J* = 268.5, 15.4 Hz, 1F); <sup>13</sup>C NMR (101 MHz, CDCl<sub>3</sub>) δ 163.0 (t, *J* = 31.8 Hz), 134.2 (s), 129.6 (s),

128.9 (s), 127.5 (s), 119.3 (s), 114.0 (t,  $J = 252.9$  Hz), 63.6 (s), 40.3 (t,  $J = 23.9$  Hz), 30.8 (t,  $J = 4.8$  Hz), 13.9 (s); **HRMS (EI)**: Calcd. For  $C_{13}H_{13}F_2NO_2$  ( $[M]^+$ ): 253.0909; Found: 253.0907; **IR (KBr)**: 2954, 2924, 2852, 2360, 2246, 1738, 1456, 1376, 1216, 1092, 748, 697  $cm^{-1}$ .

**Ethyl 4-cyano-2,2-difluoro-4-(o-tolyl)butanoate (4b)**

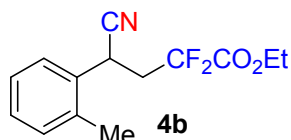

43.3 mg, 40 % yield; yellow oil;  **$^1H$  NMR** (400 MHz,  $CDCl_3$ )  $\delta$  7.45 – 7.39 (m, 1H), 7.28 – 7.22 (s, 2H), 7.22 – 7.17 (m, 1H), 4.31 – 4.21 (m, 3H), 2.80 (ddd,  $J = 30.5, 15.1, 10.0$  Hz, 1H), 2.48 (ddd,  $J = 31.3, 15.0, 4.5$  Hz, 1H), 2.36 (s, 3H), 1.33 (t,  $J = 7.2$  Hz, 3H);  **$^{19}F$  NMR** (376 MHz,  $CDCl_3$ )  $\delta$  -105.19 (dt,  $J = 267.3, 15.5$  Hz, 1F), -105.96 (dt,  $J = 267.7, 15.4$  Hz, 1F);  **$^{13}C$  NMR** (101 MHz,  $CDCl_3$ )  $\delta$  163.0 (t,  $J = 31.8$  Hz), 135.2 (s), 132.6 (s), 131.5 (s), 129.0 (s), 127.7 (s), 127.3 (s), 119.5 (s), 114.0 (t,  $J = 252.7$  Hz), 63.7 (s), 39.1 (t,  $J = 24.0$  Hz), 27.6 (t,  $J = 4.8$  Hz), 19.1 (s), 14.0 (s); **HRMS (EI)**: Calcd. For  $C_{14}H_{15}F_2NO_2$  ( $[M]^+$ ): 267.1065; Found: 267.1056; **IR (KBr)**: 2985, 2916, 2849, 2357, 2242, 1769, 1490, 1375, 1218, 1194, 1086, 913, 747  $cm^{-1}$ .

**Ethyl 4-cyano-2,2-difluoro-4-(p-tolyl)butanoate (4c)**<sup>[1]</sup>

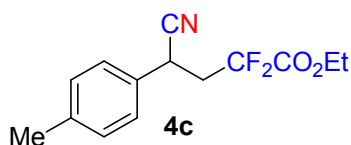

75.1 mg, 70 % yield; yellow oil;  **$^1H$  NMR** (400 MHz,  $CDCl_3$ )  $\delta$  7.23 (d,  $J = 8.2$  Hz, 2H), 7.19 (d,  $J = 8.2$  Hz, 2H), 4.31 – 4.18 (m, 2H), 4.06 (dd,  $J = 9.3, 5.1$  Hz, 1H), 2.80 (ddd,  $J = 30.6, 15.3, 9.4$  Hz, 1H), 2.55 (ddd,  $J = 30.7, 15.3, 5.0$  Hz, 1H), 2.34 (s, 3H), 1.31 (t,  $J = 7.1$  Hz, 3H);  **$^{19}F$  NMR** (376 MHz,  $CDCl_3$ )  $\delta$  -104.92 (dt,  $J = 268.5, 15.8$  Hz, 1F), -105.62 (dt,  $J = 268.1, 15.4$  Hz, 1F);  **$^{13}C$  NMR** (101 MHz,  $CDCl_3$ )  $\delta$  163.0 (t,  $J = 31.9$  Hz), 138.9 (s), 131.2 (s), 130.2 (s), 127.3 (s), 119.4 (s), 114.0 (t,  $J = 252.7$  Hz), 63.6 (s), 40.3 (t,  $J = 23.8$  Hz), 30.5 (t,  $J = 4.8$  Hz), 21.2 (s), 13.9 (s); **HRMS (EI)**: Calcd. For  $C_{14}H_{15}F_2NO_2$  ( $[M]^+$ ): 267.1065; Found: 267.1059; **IR (KBr)**: 2987, 2942, 2360, 2246, 1770, 1514, 1434, 1223, 1197, 1092, 816  $cm^{-1}$ .

### Ethyl 4-cyano-4-(3,4-dimethylphenyl)-2,2-difluorobutanoate (4d)

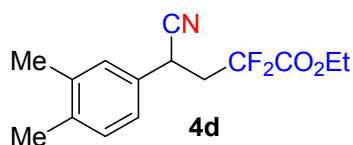

64.4 mg, 57 % yield; yellow oil;  $^1\text{H NMR}$  (400 MHz,  $\text{CDCl}_3$ )  $\delta$  7.24 (s, 1H), 7.09 (d,  $J = 7.8$  Hz, 1H), 7.06 (d,  $J = 7.8$  Hz, 1H), 4.33 – 4.22 (m, 3H), 2.81 (ddd,  $J = 31.2, 14.9, 9.9$  Hz, 1H), 2.47 (dtd,  $J = 17.0, 14.8, 4.3$  Hz, 1H), 2.34 (s, 3H), 2.32 (s, 3H), 1.35 (t,  $J = 7.2$  Hz, 3H);  $^{19}\text{F NMR}$  (376 MHz,  $\text{CDCl}_3$ )  $\delta$  -105.18 (ddd,  $J = 267.0, 16.0, 14.9$  Hz, 1F), -106.00 (ddd,  $J = 260.57, 16.7, 14.7$  Hz, 1F);  $^{13}\text{C NMR}$  (101 MHz,  $\text{CDCl}_3$ )  $\delta$  163.1 (t,  $J = 31.9$  Hz), 137.0 (s), 132.3 (s), 131.9 (s), 131.4 (s), 129.7 (s), 128.3 (s), 119.7 (s), 114.1 (t,  $J = 252.6$  Hz), 63.7 (s), 39.2 (t,  $J = 24.0$  Hz), 27.5 (t,  $J = 4.7$  Hz), 21.0 (s), 18.6 (s), 14.0 (s); **HRMS (EI)**: Calcd. For  $\text{C}_{15}\text{H}_{17}\text{F}_2\text{NO}_2$  ( $[\text{M}]^+$ ): 281.1222; Found: 281.1215; **IR (KBr)**: 2985, 2928, 2874, 2357, 2245, 1770, 1505, 1376, 1222, 1194, 1089, 817  $\text{cm}^{-1}$ .

### Ethyl 4-(4-(tert-butyl)phenyl)-4-cyano-2,2-difluorobutanoate (4e)<sup>[2]</sup>

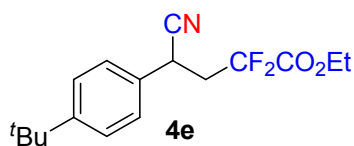

53.8 mg, 43 % yield; yellow oil;  $^1\text{H NMR}$  (400 MHz,  $\text{CDCl}_3$ )  $\delta$  7.42 (d,  $J = 8.4$  Hz, 2H), 7.29 (d,  $J = 8.4$  Hz, 2H), 4.31 – 4.17 (m, 2H), 4.09 (dd,  $J = 9.3, 5.1$  Hz, 1H), 2.91 – 2.75 (m, 1H), 2.60 (dtd,  $J = 19.9, 14.8, 5.1$  Hz, 1H), 1.34 – 1.28 (m, 12H);  $^{19}\text{F NMR}$  (376 MHz,  $\text{CDCl}_3$ )  $\delta$  -104.82 (ddd,  $J = 267.0, 16.5, 14.6$  Hz, 1F), -105.69 (dt,  $J = 270.7, 15.0$  Hz, 1F);  $^{13}\text{C NMR}$  (101 MHz,  $\text{CDCl}_3$ )  $\delta$  163.0 (t,  $J = 31.9$  Hz), 152.1 (s), 131.1 (s), 127.2 (s), 126.4 (s), 119.4 (s), 114.0 (t,  $J = 252.6$  Hz), 63.5 (s), 40.2 (t,  $J = 23.9$  Hz), 34.7 (s), 31.3 (s), 30.3 (t,  $J = 4.9$  Hz), 13.9 (s); **HRMS (EI)**: Calcd. For  $\text{C}_{17}\text{H}_{21}\text{F}_2\text{NO}_2$  ( $[\text{M}]^+$ ): 309.1535; Found: 309.1528; **IR (KBr)**: 2968, 2871, 2246, 1760, 1513, 1310, 1217, 1092, 834  $\text{cm}^{-1}$ .

### Ethyl 4-cyano-2,2-difluoro-4-(4-methoxyphenyl)butanoate (4f)

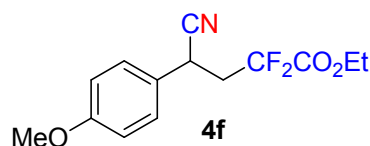

78.7 mg, 69 % yield; yellow oil;  $^1\text{H NMR}$  (400 MHz,  $\text{CDCl}_3$ )  $\delta$  7.24 (d,  $J = 8.7$  Hz, 2H), 6.88 (d,  $J = 8.7$  Hz, 2H), 4.29 – 4.16 (m, 2H), 4.04 (dd,  $J = 9.2, 5.3$  Hz, 1H), 3.77 (s, 3H), 2.78 (ddd,  $J = 30.8, 14.9, 9.3$  Hz, 1H), 2.54 (dtd,  $J = 20.1, 14.9, 5.3$  Hz, 1H), 1.29 (t,  $J = 7.2$  Hz, 3H);  $^{19}\text{F NMR}$  (376 MHz,  $\text{CDCl}_3$ )  $\delta$  -104.86 (dt,  $J = 267.0, 15.7$  Hz, 1F), -105.67 (dt,  $J = 267.0, 15.5$  Hz, 1F);  $^{13}\text{C NMR}$  (101 MHz,  $\text{CDCl}_3$ )  $\delta$  162.9 (t,  $J = 31.9$  Hz), 159.9 (s), 128.6 (s), 126.0 (s), 119.5 (s), 114.8 (s), 114.0 (t,  $J = 252.6$  Hz), 63.5 (s), 55.4 (s), 40.2 (t,  $J = 23.7$  Hz), 30.0 (t,  $J = 4.8$  Hz), 13.8 (s); **HRMS (EI)**: Calcd. For  $\text{C}_{14}\text{H}_{15}\text{F}_2\text{NO}_3$  ( $[\text{M}]^+$ ): 283.1015; Found: 283.1009; **IR (KBr)**: 2969, 2841, 2245, 1748, 1514, 1217, 1091, 832  $\text{cm}^{-1}$ .

#### Ethyl 4-cyano-2,2-difluoro-4-(3-methoxyphenyl)butanoate (4g)

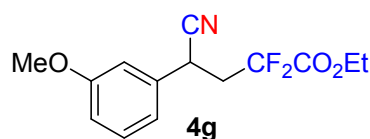

50.2 mg, 44 % yield; yellow oil;  $^1\text{H NMR}$  (400 MHz,  $\text{CDCl}_3$ )  $\delta$  7.31 – 7.25 (m, 1H), 6.91 (d,  $J = 7.8$  Hz, 1H), 6.88 – 6.83 (m, 2H), 4.31 – 4.18 (m, 2H), 4.06 (dd,  $J = 9.4, 4.9$  Hz, 1H), 3.79 (s, 3H), 2.80 (ddd,  $J = 30.9, 15.2, 9.5$  Hz, 1H), 2.56 (ddd,  $J = 31.1, 15.2, 4.9$  Hz, 1H), 1.30 (t,  $J = 7.2$  Hz, 3H);  $^{19}\text{F NMR}$  (376 MHz,  $\text{CDCl}_3$ )  $\delta$  -104.90 (dt,  $J = 267.0, 15.6$  Hz, 1F), -105.64 (dt,  $J = 271.0, 15.5$  Hz, 1F);  $^{13}\text{C NMR}$  (101 MHz,  $\text{CDCl}_3$ )  $\delta$  162.9 (t,  $J = 31.9$  Hz), 160.3 (s), 135.6 (s), 130.6 (s), 119.5 (s), 119.2 (s), 114.2 (s), 113.9 (t,  $J = 252.7$  Hz), 113.2 (s), 63.6 (s), 55.4 (s), 40.1 (t,  $J = 23.7$  Hz), 30.7 (t,  $J = 4.7$  Hz), 13.8 (s); **HRMS (EI)**: Calcd. For  $\text{C}_{14}\text{H}_{15}\text{F}_2\text{NO}_3$  ( $[\text{M}]^+$ ): 283.1015; Found: 283.1010; **IR (KBr)**: 2944, 2841, 2357, 2251, 1770, 1470, 1088, 778, 696  $\text{cm}^{-1}$ .

#### Ethyl 4-cyano-4-(3,5-dimethoxyphenyl)-2,2-difluorobutanoate (4h)

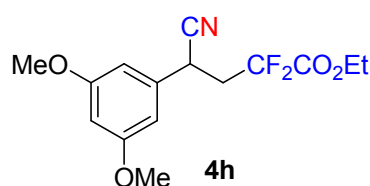

52.7 mg, 42 % yield; yellow oil;  $^1\text{H NMR}$  (400 MHz,  $\text{CDCl}_3$ )  $\delta$  6.48 – 6.46 (m, 1H), 6.43 – 6.40 (m, 2H), 4.28 (q,  $J = 7.1$  Hz, 2H), 4.02 (dd,  $J = 9.4, 4.6$  Hz, 1H), 3.79 (s, 6H), 2.81 (ddd,  $J = 24.5, 15.5, 10.2$  Hz, 1H), 2.57 (ddd,  $J = 19.9, 15.6, 4.7$  Hz, 1H), 1.33 (t,  $J = 7.1$  Hz, 3H);  $^{19}\text{F NMR}$  (376 MHz,  $\text{CDCl}_3$ )  $\delta$  -105.95 (dt,  $J = 268.5, 15.5$  Hz, 1F), -105.68 (dt,  $J = 259.1, 15.5$  Hz, 1F);  $^{13}\text{C NMR}$  (101 MHz,  $\text{CDCl}_3$ )  $\delta$  163.0 (t,  $J = 31.9$  Hz), 161.6 (s), 136.3 (s), 119.1 (s), 113.9 (t,  $J = 252.8$  Hz), 105.5 (s), 100.5 (s), 63.6 (s), 55.6 (s), 40.2 (t,  $J = 24.0$  Hz), 30.9 (t,  $J = 4.8$  Hz), 13.9 (s); **HRMS (EI)**: Calcd. For  $\text{C}_{15}\text{H}_{17}\text{F}_2\text{NO}_4$  ( $[\text{M}]^+$ ): 313.1120; Found: 313.1111; **IR (KBr)**: 2943, 2846, 2359, 2247, 1770, 1092, 789, 850  $\text{cm}^{-1}$ .

**Ethyl 4-cyano-2,2-difluoro-4-(4-fluorophenyl)butanoate (4i)**

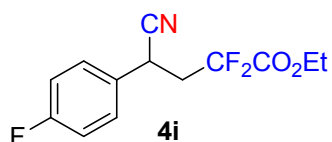

69.1 mg, 64 % yield; colorless oil;  $^1\text{H NMR}$  (400 MHz,  $\text{CDCl}_3$ )  $\delta$  7.39 – 7.32 (m, 2H), 7.10 (t,  $J = 8.5$  Hz, 2H), 4.29 (q,  $J = 7.1$  Hz, 2H), 4.12 (dd,  $J = 8.9, 5.3$  Hz, 1H), 2.83 (ddd,  $J = 30.7, 15.3, 9.2$  Hz, 1H), 2.57 (ddd,  $J = 30.7, 15.3, 5.2$  Hz, 1H), 1.34 (t,  $J = 7.1$  Hz, 3H);  $^{19}\text{F NMR}$  (376 MHz,  $\text{CDCl}_3$ )  $\delta$  -105.30 (t,  $J = 15.4$  Hz, 2F), -112.34 – -112.47 (m, 1F);  $^{13}\text{C NMR}$  (101 MHz,  $\text{CDCl}_3$ )  $\delta$  162.9 (t,  $J = 31.8$  Hz), 162.9 (d,  $J = 248.9$  Hz), 130.1 (d,  $J = 3.3$  Hz), 129.4 (d,  $J = 8.5$  Hz), 119.1 (s), 116.6 (d,  $J = 22.0$  Hz), 113.9 (t,  $J = 253.1$  Hz), 63.7 (s), 40.3 (t,  $J = 23.6$  Hz), 30.2 (t,  $J = 4.7$  Hz), 14.0 (s); **HRMS (EI)**: Calcd. For  $\text{C}_{13}\text{H}_{12}\text{F}_3\text{NO}_2$  ( $[\text{M}]^+$ ): 271.0815; Found: 271.0824; **IR (KBr)**: 2991, 2970, 2944, 2370, 2247, 1754, 1511, 1375, 1217, 1091, 837  $\text{cm}^{-1}$ .

**Ethyl 4-cyano-2,2-difluoro-4-(3-fluorophenyl)butanoate (4j)**

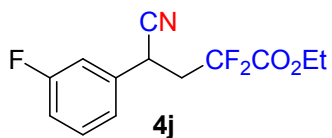

63.7 mg, 59 % yield; yellow oil;  $^1\text{H NMR}$  (400 MHz,  $\text{CDCl}_3$ )  $\delta$  7.39 (td,  $J = 7.9, 6.0$  Hz, 1H), 7.17 (d,  $J = 7.7$  Hz, 1H), 7.13 – 7.04 (m, 2H), 4.30 (q,  $J = 7.1$  Hz, 2H), 4.13 (dd,  $J = 9.3, 5.1$  Hz, 1H), 2.84 (qd,  $J = 15.4, 9.3$  Hz, 1H), 2.59 (qd,  $J = 15.3, 5.0$  Hz, 1H), 1.35 (t,  $J = 7.1$  Hz, 3H);  $^{19}\text{F NMR}$  (376 MHz,  $\text{CDCl}_3$ )  $\delta$  -105.26 (t,  $J = 15.6$

Hz, 2F), -110.69 (td,  $J = 8.8, 5.8$  Hz, 1F);  $^{13}\text{C}$  NMR (101 MHz,  $\text{CDCl}_3$ )  $\delta$  163.2 (d,  $J = 248.7$  Hz), 162.9 (t,  $J = 31.8$  Hz), 136.5 (d,  $J = 7.5$  Hz), 131.3 (d,  $J = 8.3$  Hz), 123.2 (d,  $J = 3.1$  Hz), 118.8 (s), 116.1 (d,  $J = 21.0$  Hz), 114.8 (d,  $J = 23.0$  Hz), 113.8 (t,  $J = 276.0$  Hz), 63.8 (s), 40.1 (t,  $J = 23.9$  Hz), 30.6 (td,  $J = 4.7, 1.9$  Hz), 14.0 (s); **HRMS (EI)**: Calcd. For  $\text{C}_{13}\text{H}_{12}\text{F}_3\text{NO}_2$  ( $[\text{M}]^+$ ): 271.0815; Found: 271.0817; **IR (KBr)**: 3002, 2970, 2944, 2370, 2247, 1738, 1435, 1365, 1228, 1092, 744  $\text{cm}^{-1}$ .

#### Ethyl 4-cyano-2,2-difluoro-4-(2-fluorophenyl)butanoate (4k)

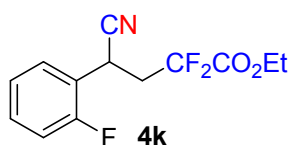

33.5 mg, 31 % yield; yellow oil;  $^1\text{H}$  NMR (400 MHz,  $\text{CDCl}_3$ )  $\delta$  7.47 (t,  $J = 7.6$  Hz, 1H), 7.38 (dd,  $J = 14.1, 6.9$  Hz, 1H), 7.21 (t,  $J = 7.6$  Hz, 1H), 7.16 – 7.09 (m, 1H), 4.40 (dd,  $J = 9.0, 5.1$  Hz, 1H), 4.29 (q,  $J = 7.1$  Hz, 2H), 2.85 (ddd,  $J = 30.7, 15.3, 9.2$  Hz, 1H), 2.62 (ddd,  $J = 30.8, 15.5, 5.0$  Hz, 1H), 1.34 (t,  $J = 7.2$  Hz, 3H);  $^{19}\text{F}$  NMR (376 MHz,  $\text{CDCl}_3$ )  $\delta$  -105.55 (td,  $J = 15.5, 3.2$  Hz, 2F), -117.25 – -117.33 (m, 1F);  $^{13}\text{C}$  NMR (101 MHz,  $\text{CDCl}_3$ )  $\delta$  162.9 (t,  $J = 31.8$  Hz), 159.8 (d,  $J = 248.8$  Hz), 131.1 (d,  $J = 8.3$  Hz), 129.3 (d,  $J = 2.7$  Hz), 125.2 (d,  $J = 3.7$  Hz), 121.4 (d,  $J = 13.7$  Hz), 118.3 (s), 116.3 (d,  $J = 20.9$  Hz), 113.9 (t,  $J = 253.1$  Hz), 63.7 (s), 38.4 (t,  $J = 24.0$  Hz), 25.2 (dd,  $J = 8.7, 4.9$  Hz), 13.9 (s); **HRMS (EI)**: Calcd. For  $\text{C}_{13}\text{H}_{12}\text{F}_3\text{NO}_2$  ( $[\text{M}]^+$ ): 271.0815; Found: 271.0811; **IR (KBr)**: 2987, 2970, 2361, 2248, 1769, 1590, 1494, 1231, 1088, 760  $\text{cm}^{-1}$ .

#### Ethyl 4-(2-chlorophenyl)-4-cyano-2,2-difluorobutanoate (4l)

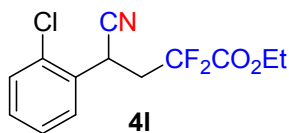

51.9 mg, 45 % yield; yellow oil;  $^1\text{H}$  NMR (400 MHz,  $\text{CDCl}_3$ )  $\delta$  7.62 – 7.56 (m, 1H), 7.44 (dd,  $J = 7.3, 1.9$  Hz, 1H), 7.40 – 7.29 (m, 2H), 4.61 (dd,  $J = 10.0, 4.0$  Hz, 1H), 4.32 (q,  $J = 7.2$  Hz, 2H), 2.87 – 2.70 (m, 1H), 2.68 – 2.53 (m, 1H), 1.36 (t,  $J = 7.2$  Hz, 3H);  $^{19}\text{F}$  NMR (376 MHz,  $\text{CDCl}_3$ )  $\delta$  -104.94 (ddd,  $J = 267.0, 17.0, 13.3$  Hz, 1F), -105.92 (ddd,  $J = 267.0, 17.6, 13.8$  Hz, 1F);  $^{13}\text{C}$  NMR (101 MHz,  $\text{CDCl}_3$ )  $\delta$



163.0 (t,  $J = 31.8$  Hz), 132.8 (s), 131.9 (s), 130.51 (s), 130.47 (s), 129.3 (s), 128.1 (s), 118.6 (s), 113.9 (t,  $J = 253.5$  Hz), 63.7 (s), 38.3 (t,  $J = 24.0$  Hz), 28.5 (t,  $J = 4.7$  Hz), 14.0 (s); **HRMS (EI)**: Calcd. For  $C_{13}H_{12}^{35}ClF_2NO_2$  ( $[M]^+$ ): 287.0519; Found: 287.0529; **IR (KBr)**: 2987, 2941, 2874, 2360, 2248, 1760, 1376, 1217, 1092, 756  $cm^{-1}$ .

**Ethyl 4-(4-chlorophenyl)-4-cyano-2,2-difluorobutanoate (4m)**

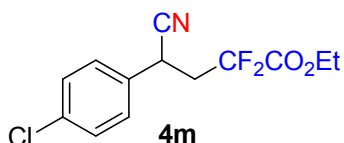

94.8 mg, 82 % yield; yellow oil;  **$^1H$  NMR** (400 MHz,  $CDCl_3$ )  $\delta$  7.39 (d,  $J = 8.6$  Hz, 2H), 7.31 (d,  $J = 8.5$  Hz, 2H), 4.35 – 4.23 (m, 2H), 4.11 (dd,  $J = 9.1, 5.2$  Hz, 1H), 2.82 (qd,  $J = 15.3, 9.2$  Hz, 1H), 2.56 (qd,  $J = 15.4, 5.2$  Hz, 1H), 1.34 (t,  $J = 7.2$  Hz, 3H);  **$^{19}F$  NMR** (376 MHz,  $CDCl_3$ )  $\delta$  -105.22 (t,  $J = 15.4$  Hz, 2F);  **$^{13}C$  NMR** (101 MHz,  $CDCl_3$ )  $\delta$  162.9 (t,  $J = 31.8$  Hz), 135.1 (s), 132.7 (s), 129.8 (s), 128.9 (s), 118.9 (s), 113.8 (t,  $J = 253.0$  Hz), 63.8 (s), 40.1 (t,  $J = 23.9$  Hz), 30.3 (t,  $J = 4.7$  Hz), 13.9 (s); **HRMS (EI)**: Calcd. For  $C_{13}H_{12}^{35}ClF_2NO_2$  ( $[M]^+$ ): 287.0519; Found: 287.0516; **IR (KBr)**: 2988, 2942, 2248, 1770, 1494, 1223, 1197, 1095, 829  $cm^{-1}$ .

**Ethyl 4-(4-bromophenyl)-4-cyano-2,2-difluorobutanoate (4n)**

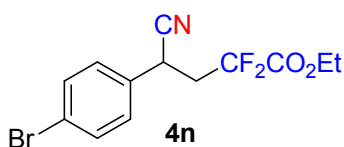

82.9 mg, 62 % yield; yellow oil;  **$^1H$  NMR** (400 MHz,  $CDCl_3$ )  $\delta$  7.53 (d,  $J = 8.0$  Hz, 2H), 7.24 (d,  $J = 6.4$  Hz, 2H), 4.27 (q,  $J = 7.1$  Hz, 2H), 4.08 (dd,  $J = 8.9, 5.3$  Hz, 1H), 2.81 (qd,  $J = 15.4, 9.3$  Hz, 1H), 2.54 (ddd,  $J = 30.7, 15.2, 5.1$  Hz, 1H), 1.33 (t,  $J = 7.1$  Hz, 3H);  **$^{19}F$  NMR** (376 MHz,  $CDCl_3$ )  $\delta$  -105.22 (t,  $J = 15.4$  Hz, 2F);  **$^{13}C$  NMR** (101 MHz,  $CDCl_3$ )  $\delta$  162.9 (t,  $J = 31.8$  Hz), 133.3 (s), 132.8 (s), 129.2 (s), 123.2 (s), 118.8 (s), 113.8 (t,  $J = 253.1$  Hz), 63.8 (s), 40.1 (t,  $J = 23.8$  Hz), 30.4 (t,  $J = 4.7$  Hz), 14.0 (s); **HRMS (EI)**: Calcd. For  $C_{13}H_{12}^{79}BrF_2NO_2$  ( $[M]^+$ ): 331.0014; Found: 331.0006; **IR (KBr)**: 2928, 2355, 2255, 1766, 1489, 1195, 1086, 822  $cm^{-1}$ .

**Ethyl 4-(3-bromophenyl)-4-cyano-2,2-difluorobutanoate (4o)**

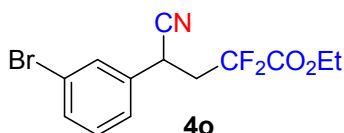

86.6 mg, 65 % yield; yellow oil;  $^1\text{H NMR}$  (400 MHz,  $\text{CDCl}_3$ )  $\delta$  7.55 – 7.47 (m, 2H), 7.35 – 7.27 (m, 2H), 4.30 (q,  $J = 7.1$  Hz, 2H), 4.10 (dd,  $J = 9.2, 5.2$  Hz, 1H), 2.84 (qd,  $J = 15.2, 9.3$  Hz, 1H), 2.58 (qd,  $J = 15.4, 5.1$  Hz, 1H), 1.36 (t,  $J = 7.2$  Hz, 3H);  $^{19}\text{F NMR}$  (376 MHz,  $\text{CDCl}_3$ )  $\delta$  -105.23 (t,  $J = 15.4$  Hz, 2F);  $^{13}\text{C NMR}$  (101 MHz,  $\text{CDCl}_3$ )  $\delta$  162.9 (t,  $J = 31.8$  Hz), 136.3 (s), 132.3 (s), 131.1 (s), 130.6 (s), 126.2 (s), 123.5 (s), 118.7 (s), 113.8 (t,  $J = 253.2$  Hz), 63.8 (s), 40.1 (t,  $J = 24.0$  Hz), 30.5 (t,  $J = 4.8$  Hz), 14.0 (s); **HRMS (EI)**: Calcd. For  $\text{C}_{13}\text{H}_{12}^{79}\text{BrF}_2\text{NO}_2$  ( $[\text{M}]^+$ ): 331.0014; Found: 331.0024; **IR (KBr)**: 2987, 2925, 2850, 2326, 2247, 1766, 1475, 1195, 1088, 785, 693  $\text{cm}^{-1}$ .

#### Ethyl 4-cyano-2,2-difluoro-4-(4-(trifluoromethyl)phenyl)butanoate (4p)

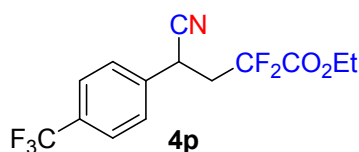

87.4 mg, 68 % yield; yellow oil;  $^1\text{H NMR}$  (400 MHz,  $\text{CDCl}_3$ )  $\delta$  7.69 (d,  $J = 8.1$  Hz, 2H), 7.53 (d,  $J = 8.1$  Hz, 2H), 4.29 (q,  $J = 7.2$  Hz, 2H), 4.21 (dd,  $J = 9.1, 5.1$  Hz, 1H), 2.86 (ddd,  $J = 30.9, 15.0, 9.2$  Hz, 1H), 2.60 (ddd,  $J = 31.1, 15.0, 5.2$  Hz, 1H), 1.34 (t,  $J = 7.2$  Hz, 3H);  $^{19}\text{F NMR}$  (376 MHz,  $\text{CDCl}_3$ )  $\delta$  -62.92 (s, 3F), -105.20 (td,  $J = 15.4, 5.7$  Hz, 2F);  $^{13}\text{C NMR}$  (101 MHz,  $\text{CDCl}_3$ )  $\delta$  162.8 (t,  $J = 31.7$  Hz), 138.2 (s), 131.4 (q,  $J = 32.9$  Hz), 128.1 (s), 126.6 (q,  $J = 3.7$  Hz), 123.7 (q,  $J = 272.3$  Hz), 118.6 (s), 113.8 (t,  $J = 253.4$  Hz), 63.8 (s), 40.0 (t,  $J = 23.9$  Hz), 30.7 (t,  $J = 4.6$  Hz), 13.9 (s); **HRMS (EI)**: Calcd. For  $\text{C}_{14}\text{H}_{12}\text{F}_5\text{NO}_2$  ( $[\text{M}]^+$ ): 321.0783; Found: 321.0781; **IR (KBr)**: 2991, 2970, 2945, 2361, 2249, 1766, 1620, 1328, 1092, 842  $\text{cm}^{-1}$ .

#### Ethyl 4-cyano-2,2-difluoro-4-(3-(trifluoromethyl)phenyl)butanoate (4q)

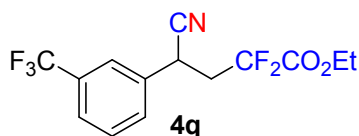

63.1 mg, 49 % yield; yellow oil;  $^1\text{H NMR}$  (400 MHz,  $\text{CDCl}_3$ )  $\delta$  7.68 – 7.54 (m, 4H), 4.30 (q,  $J = 7.1$  Hz, 2H), 4.22 (dd,  $J = 9.1, 5.2$  Hz, 1H), 2.88 (qd,  $J = 15.3, 9.3$

Hz, 1H), 2.61 (qd,  $J = 15.3, 5.1$  Hz, 1H), 1.35 (t,  $J = 7.1$  Hz, 3H);  $^{19}\text{F}$  NMR (376 MHz,  $\text{CDCl}_3$ )  $\delta$  -62.83 (s, 3F), -105.17 (td,  $J = 15.6, 2.1$  Hz, 2F);  $^{13}\text{C}$  NMR (101 MHz,  $\text{CDCl}_3$ )  $\delta$  162.8 (t,  $J = 31.7$  Hz), 135.3 (s), 132.1 (q,  $J = 32.8$  Hz), 131.0 (s), 130.3 (s), 126.0 (q,  $J = 3.6$  Hz), 124.4 (q,  $J = 3.8$  Hz), 123.6 (q,  $J = 272.5$  Hz), 118.6 (s), 113.8 (t,  $J = 253.3$  Hz), 63.8 (s), 40.0 (t,  $J = 23.9$  Hz), 30.7 (t,  $J = 4.7$  Hz), 13.9 (s); **HRMS (EI)**: Calcd. For  $\text{C}_{14}\text{H}_{12}\text{F}_5\text{NO}_2$  ( $[\text{M}]^+$ ): 321.0783; Found: 321.0795; **IR (KBr)**: 2990, 2945, 2249, 1770, 1599, 1494, 1330, 1170, 779, 702  $\text{cm}^{-1}$ .

**Ethyl 4-(4-acetoxyphenyl)-4-cyano-2,2-difluorobutanoate (4r)**

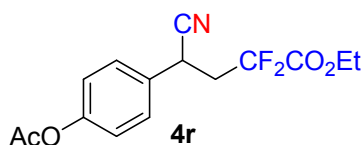

68.0 mg, 55% yield; orange oil;  $^1\text{H}$  NMR (400 MHz,  $\text{CDCl}_3$ )  $\delta$  7.39 (d,  $J = 8.6$  Hz, 2H), 7.14 (d,  $J = 8.6$  Hz, 2H), 4.34 – 4.21 (m, 2H), 4.13 (dd,  $J = 9.3, 5.1$  Hz, 1H), 2.83 (ddd,  $J = 30.8, 14.8, 9.3$  Hz, 1H), 2.59 (dtd,  $J = 19.9, 14.8, 5.1$  Hz, 1H), 2.31 (s, 3H), 1.34 (t,  $J = 7.2$  Hz, 3H);  $^{19}\text{F}$  NMR (376 MHz,  $\text{CDCl}_3$ )  $\delta$  -104.87 (dt,  $J = 267.0, 15.3$  Hz, 1F), -105.68 (dt,  $J = 270.7, 15.3$  Hz, 1F);  $^{13}\text{C}$  NMR (101 MHz,  $\text{CDCl}_3$ )  $\delta$  169.3 (s), 162.9 (t,  $J = 31.8$  Hz), 151.1 (s), 131.7 (s), 128.7 (s), 122.8 (s), 119.1 (s), 113.9 (t,  $J = 253.0$  Hz), 63.7 (s), 40.3 (t,  $J = 23.9$  Hz), 30.4 (t,  $J = 4.9$  Hz), 21.2 (s), 14.0 (s); **HRMS (EI)**: Calcd. For  $\text{C}_{15}\text{H}_{15}\text{F}_2\text{NO}_4$  ( $[\text{M}]^+$ ): 311.0964; Found: 311.0956; **IR (KBr)**: 3001, 2970, 2943, 2366, 2247, 1739, 1366, 1217, 1092, 910  $\text{cm}^{-1}$ .

**Ethyl 4-cyano-4-(4-(cyanomethyl)phenyl)-2,2-difluorobutanoate (4s)**

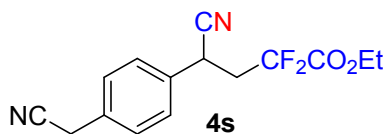

69.2 mg, 59 % yield; white solid; m.p.: 76.6  $^{\circ}\text{C}$ ;  $^1\text{H}$  NMR (400 MHz,  $\text{CDCl}_3$ )  $\delta$  7.43 – 7.36 (m, 4H), 4.29 (q,  $J = 7.1$  Hz, 2H), 4.14 (dd,  $J = 9.2, 5.1$  Hz, 1H), 3.77 (s, 2H), 2.83 (ddd,  $J = 30.7, 15.3, 9.3$  Hz, 1H), 2.57 (ddd,  $J = 30.9, 15.3, 5.1$  Hz, 1H), 1.34 (t,  $J = 7.1$  Hz, 3H);  $^{19}\text{F}$  NMR (376 MHz,  $\text{CDCl}_3$ )  $\delta$  -104.86 (dt,  $J = 274.5, 15.3$  Hz, 1F), -105.59 (dt,  $J = 270.1, 15.5$  Hz, 1F);  $^{13}\text{C}$  NMR (101 MHz,  $\text{CDCl}_3$ )  $\delta$  162.9 (t,  $J = 31.8$  Hz), 134.4 (s), 131.0 (s), 129.2 (s), 128.3 (s), 118.9 (s), 117.4 (s), 113.9 (t,  $J = 253.0$  Hz), 63.7 (s), 40.3 (t,  $J = 23.9$  Hz), 30.4 (t,  $J = 4.9$  Hz), 21.2 (s), 14.0 (s).

= 253.2 Hz), 63.7 (s), 40.1 (t,  $J = 23.8$  Hz), 30.5 (t,  $J = 4.7$  Hz), 23.4 (s), 13.9 (s); **HRMS (EI)**: Calcd. For  $C_{15}H_{14}F_2N_2O_2$  ( $[M]^+$ ): 292.1018; Found: 292.1025; **IR (KBr)**: 2995, 2970, 2944, 2366, 2249, 1739, 1365, 1217, 1092, 850  $cm^{-1}$ .

#### Ethyl 4-cyano-2,2-difluoro-4-(6-methoxynaphthalen-2-yl)butanoate (**4t**)

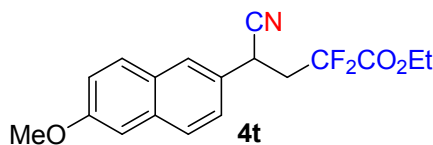

56.5 mg, 42 % yield; red solid; m.p.: 58.5 °C;  **$^1H$  NMR** (400 MHz,  $CDCl_3$ )  $\delta$  7.81 – 7.70 (m, 3H), 7.38 (d,  $J = 8.5$  Hz, 1H), 7.20 (d,  $J = 8.9$  Hz, 1H), 7.13 (s, 1H), 4.29 – 4.13 (m, 3H), 3.93 (s, 3H), 2.90 (ddd,  $J = 30.5, 15.2, 9.3$  Hz, 1H), 2.68 (ddd,  $J = 30.5, 15.2, 5.1$  Hz, 1H), 1.29 (t,  $J = 7.1$  Hz, 3H);  **$^{19}F$  NMR** (376 MHz,  $CDCl_3$ )  $\delta$ -104.76 (dt,  $J = 270.7, 15.0$  Hz, 1F), -105.60 (dt,  $J = 267.0, 15.4$  Hz, 1F);  **$^{13}C$  NMR** (101 MHz,  $CDCl_3$ )  $\delta$  163.0 (t,  $J = 31.8$  Hz), 158.6 (s), 134.5 (s), 129.5 (s), 128.9 (s), 128.8 (s), 128.4 (s), 126.6 (s), 125.1 (s), 120.0 (s), 119.4 (s), 114.0 (t,  $J = 252.7$  Hz), 105.8 (s), 63.6 (s), 55.5 (s), 40.3 (t,  $J = 23.9$  Hz), 30.9 (t,  $J = 4.8$  Hz), 13.9 (s); **HRMS (EI)**: Calcd. For  $C_{18}H_{17}F_2NO_3$  ( $[M]^+$ ): 333.1171; Found: 333.1173; **IR (KBr)**: 2986, 2941, 2845, 2246, 1770, 1608, 1485, 1093, 854  $cm^{-1}$ .

#### Ethyl 4-cyano-2,2-difluoro-6-phenylhexanoate (**4u**)

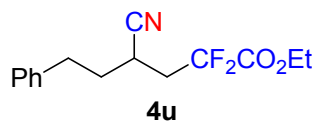

44.7 mg, 40 % yield; yellow oil;  **$^1H$  NMR** (400 MHz,  $CDCl_3$ )  $\delta$  7.31 (t,  $J = 7.3$  Hz, 2H), 7.23 (d,  $J = 7.6$  Hz, 1H), 7.19 (d,  $J = 7.3$  Hz, 2H), 4.32 (q,  $J = 7.1$  Hz, 2H), 2.91 (ddd,  $J = 13.3, 9.4, 4.9$  Hz, 1H), 2.86 – 2.71 (m, 2H), 2.63 – 2.44 (m, 1H), 2.36 – 2.20 (m, 1H), 2.08 – 1.89 (m, 2H), 1.33 (t,  $J = 7.2$  Hz, 3H);  **$^{19}F$  NMR** (376 MHz,  $CDCl_3$ )  $\delta$  -104.18 (ddd,  $J = 267.0, 18.9, 12.1$  Hz, 1F), -105.91 (dddd,  $J = 267.0, 16.9, 13.9, 2.5$  Hz, 1F);  **$^{13}C$  NMR** (101 MHz,  $CDCl_3$ )  $\delta$  163.1 (t,  $J = 32.0$  Hz), 139.4 (s), 128.8 (s), 128.5 (s), 126.7 (s), 120.1 (s), 114.3 (t,  $J = 252.5$  Hz), 63.6 (s), 36.8 (t,  $J = 23.9$  Hz), 34.3 (s), 32.9 (s), 24.5 (t,  $J = 4.1$  Hz), 13.9 (s); **HRMS (EI)**: Calcd. For  $C_{15}H_{17}F_2NO_2$  ( $[M]^+$ ): 281.1222; Found: 281.1228; **IR (KBr)**: 2940, 2867, 2366, 2366,

2243, 1767, 1603, 1374, 1098, 913, 744, 700 cm<sup>-1</sup>.

**Ethyl 4-cyano-2,2-difluoro-5-phenoxy pentanoate (4v)**

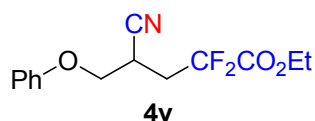

48.8 mg, 43 % yield; yellow oil; **<sup>1</sup>H NMR** (400 MHz, CDCl<sub>3</sub>) δ 7.32 (t, *J* = 7.7 Hz, 2H), 7.03 (t, *J* = 7.4 Hz, 1H), 6.91 (d, *J* = 8.6 Hz, 2H), 4.36 (q, *J* = 7.1 Hz, 2H), 4.22 – 4.12 (m, 2H), 3.36 (td, *J* = 10.8, 5.4 Hz, 1H), 2.78 – 2.54 (m, 2H), 1.38 (t, *J* = 7.2 Hz, 3H); **<sup>19</sup>F NMR** (376 MHz, CDCl<sub>3</sub>) δ -104.65 (ddd, *J* = 267.0, 18.7, 13.1 Hz, 1F), -105.74 (ddd, *J* = 267.0, 18.9, 14.1 Hz, 1F); **<sup>13</sup>C NMR** (101 MHz, CDCl<sub>3</sub>) δ 163.1 (t, *J* = 31.9 Hz), 157.6 (s), 129.8 (s), 122.3 (s), 118.4 (s), 114.8 (s), 114.3 (t, *J* = 252.5 Hz), 66.8 (s), 63.8 (s), 34.0 (t, *J* = 24.1 Hz), 25.9 (t, *J* = 4.1 Hz), 14.0 (s); **HRMS (EI)**: Calcd. For C<sub>14</sub>H<sub>15</sub>F<sub>2</sub>NO<sub>3</sub> ([M]<sup>+</sup>): 283.1015; Found: 283.1011; **IR (KBr)**: 2969, 2928, 2850, 2362, 2250, 1752, 1599, 1375, 1217, 1053, 913, 748, 691 cm<sup>-1</sup>.

**Ethyl 4-cyano-2,2-difluorotetradecanoate (4w)**

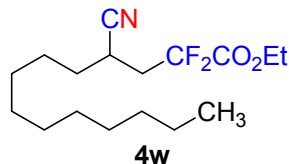

77.9 mg, 61 % yield; yellow oil; **<sup>1</sup>H NMR** (400 MHz, CDCl<sub>3</sub>) δ 4.35 (q, *J* = 7.1 Hz, 2H), 2.91 – 2.78 (m, 1H), 2.60 – 2.42 (m, 1H), 2.33 – 2.17 (m, 1H), 1.74 – 1.60 (m, 2H), 1.60 – 1.50 (m, 1H), 1.50 – 1.40 (m, 1H), 1.36 (t, *J* = 7.2 Hz, 3H), 1.33 – 1.17 (m, 14H), 0.87 (t, *J* = 6.7 Hz, 3H); **<sup>19</sup>F NMR** (376 MHz, CDCl<sub>3</sub>) δ -104.38 (ddd, *J* = 263.2, 18.9, 12.0 Hz, 1F), -106.30 (ddd, *J* = 267.0, 19.4, 14.1 Hz, 1F); **<sup>13</sup>C NMR** (101 MHz, CDCl<sub>3</sub>) δ 163.2 (t, *J* = 31.9 Hz), 120.5 (s), 114.4 (t, *J* = 252.5 Hz), 63.6 (s), 37.0 (t, *J* = 23.8 Hz), 32.8 (s), 32.0 (s), 29.62 (s), 29.56 (s), 29.4 (s), 29.0 (s), 26.8 (s), 25.0 (t, *J* = 5.0 Hz), 22.8 (s), 14.2 (s), 14.0 (s); **HRMS (EI)**: Calcd. For C<sub>17</sub>H<sub>29</sub>F<sub>2</sub>NO<sub>2</sub> ([M-H]<sup>+</sup>): 316.2083; Found: 316.2078; **IR (KBr)**: 2927, 2856, 2361, 2244, 1770, 1467, 1377, 1198, 1098 cm<sup>-1</sup>.

**Ethyl 5-(4-acetoxy-3-methoxyphenyl)-4-cyano-2,2-difluoropentanoate (4x)**

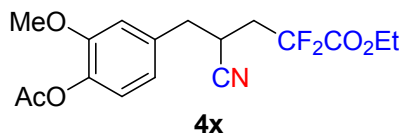

69.5 mg, 50 % yield; yellow oil;  $^1\text{H NMR}$  (400 MHz,  $\text{CDCl}_3$ )  $\delta$  7.00 (d,  $J = 8.0$  Hz, 1H), 6.87 (s, 1H), 6.82 (d,  $J = 8.0$  Hz, 1H), 4.34 (q,  $J = 7.1$  Hz, 2H), 3.83 (s, 3H), 3.19 – 3.08 (m, 1H), 2.97 (d,  $J = 7.0$  Hz, 2H), 2.58 – 2.41 (m, 1H), 2.40 – 2.25 (m, 1H), 2.30 (s, 3H), 1.35 (t,  $J = 7.2$  Hz, 3H);  $^{19}\text{F NMR}$  (376 MHz,  $\text{CDCl}_3$ )  $\delta$  -104.13 (ddd,  $J = 266.6, 18.9, 12.0$  Hz, 1F), -105.32 -106.22 (m, 1F);  $^{13}\text{C NMR}$  (101 MHz,  $\text{CDCl}_3$ )  $\delta$  169.1 (s), 163.1 (t,  $J = 31.8$  Hz), 151.4 (s), 139.4 (s), 134.4 (s), 123.2 (s), 121.4 (s), 120.0 (s), 114.4 (t,  $J = 203.0$  Hz), 113.3 (s), 63.7 (s), 56.0 (s), 38.3 (s), 36.1 (t,  $J = 23.8$  Hz), 26.8 (t,  $J = 3.7$  Hz), 20.7 (s), 13.9 (s); **HRMS (EI)**: Calcd. For  $\text{C}_{17}\text{H}_{19}\text{F}_2\text{NO}_5$  ( $[\text{M}]^+$ ): 355.1226; Found: 355.1218; **IR (KBr)**: 2985, 2941, 2245, 1606, 1512, 1467, 1371, 1124, 1095, 852  $\text{cm}^{-1}$ .

**Ethyl-4-cyano-2,2-difluoro-4-((8R,9S,13S,14R)-13-methyl-17-oxo-7,8,9,11,12,13,14,15,16,17-decahydro-6H-cyclopenta[a]phenanthren-3-yl)butanoate (4y)**

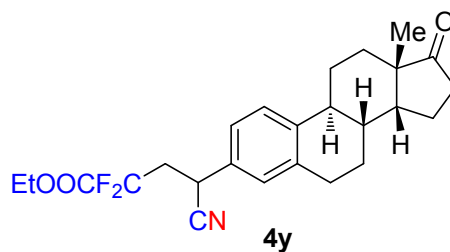

83.7 mg, 49 % yield; colorless oil;  $^1\text{H NMR}$  (400 MHz,  $\text{CDCl}_3$ )  $\delta$  7.31 (d,  $J = 8.0$  Hz, 1H), 7.11 (d,  $J = 8.4$  Hz, 1H), 7.09 (s, 1H), 4.27 (q,  $J = 7.1$  Hz, 2H), 4.04 (dd,  $J = 9.6, 4.7$  Hz, 1H), 2.95 – 2.88 (m, 2H), 2.87 – 2.71 (m, 1H), 2.62 – 2.46 (m, 2H), 2.45 – 2.37 (m, 1H), 2.28 (t,  $J = 8.3$  Hz, 1H), 2.15 (dd,  $J = 18.4, 9.3$  Hz, 1H), 2.11 – 1.99 (m, 2H), 1.95 (dd,  $J = 11.1, 8.9$  Hz, 1H), 1.68 – 1.39 (m, 6H), 1.33 (t,  $J = 7.1$  Hz, 3H), 0.90 (s, 3H);  $^{19}\text{F NMR}$  (376 MHz,  $\text{CDCl}_3$ )  $\delta$  -105.30 (t,  $J = 15.5$  Hz, 2F);  $^{13}\text{C NMR}$  (101 MHz,  $\text{CDCl}_3$ )  $\delta$  220.7 (s), 162.9 (t,  $J = 32.0$  Hz), 140.6 (s), 137.9 (s), 131.6 (s), 127.9 (s), 126.5 (s), 124.7 (s), 119.4 (s), 113.9 (t,  $J = 252.5$  Hz), 63.5 (s), 50.4 (s), 47.9 (s), 44.3 (s), 40.2 (t,  $J = 23.8$  Hz), 38.0 (s), 35.8 (s), 31.5 (s), 30.34 – 30.10 (m),

29.35 (s), 29.32 (s), 26.3 (s), 25.7 (s), 21.6 (s), 13.9 (s), 13.8 (s); **HRMS (EI)**: Calcd. For C<sub>25</sub>H<sub>29</sub>F<sub>2</sub>NO<sub>3</sub> ([M]<sup>+</sup>): 429.2110; Found: 429.2106; **IR (KBr)**: 2933, 2865, 2358, 2345, 2244, 1770, 1738, 1500, 1375, 1192, 1088, 851, 732 cm<sup>-1</sup>.

## 4. Preliminary Mechanistic Studies

### 4.1 Cyanide Detection Test with Picric Acid Paper

The cyanide detection tests with picric acid paper were performed according to previous procedures.<sup>[3]</sup> Picrate paper was prepared by wetting filter paper with a solution of sodium bicarbonate (5.0 g) and picric acid (0.5 g) in water (100 mL). After being dried, the paper was cut into strips and the strips were separately inserted into 2 mL vials.

The reaction mixture indicated in Table 2 in the main text was stirred at room temperature for 12 h in a 15 mL Schlenk tube under a N<sub>2</sub> atmosphere. The Schlenk tube was opened, tartrate acid (0.5 g) was added into the reaction mixture, and the vial containing the picric acid paper obtained above was inserted into the Schlenk tube. The vial was kept opened, and the Schlenk tube was sealed. The reaction mixture was stirred at 60 °C for 30 minutes. If CN<sup>-</sup> anion was generated from the reaction mixture, the color of the test paper would turn to rose-red. If not, no change in the color would be observed. The Schlenk tubes containing the vials were shown as follows.

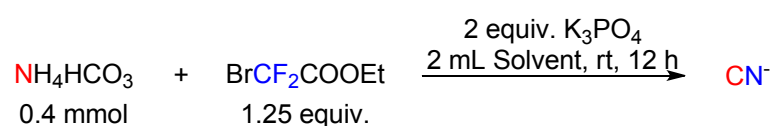

| Entry | NH <sub>4</sub> HCO <sub>3</sub> | BrCF <sub>2</sub> COOEt | Solvent | CN <sup>-</sup> produce |
|-------|----------------------------------|-------------------------|---------|-------------------------|
| 1     | √                                | ×                       | DMF     | -                       |
| 2     | ×                                | √                       | DMF     | -                       |
| 3     | √                                | √                       | DMF     | +                       |
| 4     | √                                | √                       | DMAc    | +                       |
| 5     | √                                | √                       | MeCN    | +                       |
| 6     | √                                | √                       | DG      | +                       |

[a] “√” means the reagent was used; “×” means the reagent was not used; “+” means positive result; “-” means negative result.

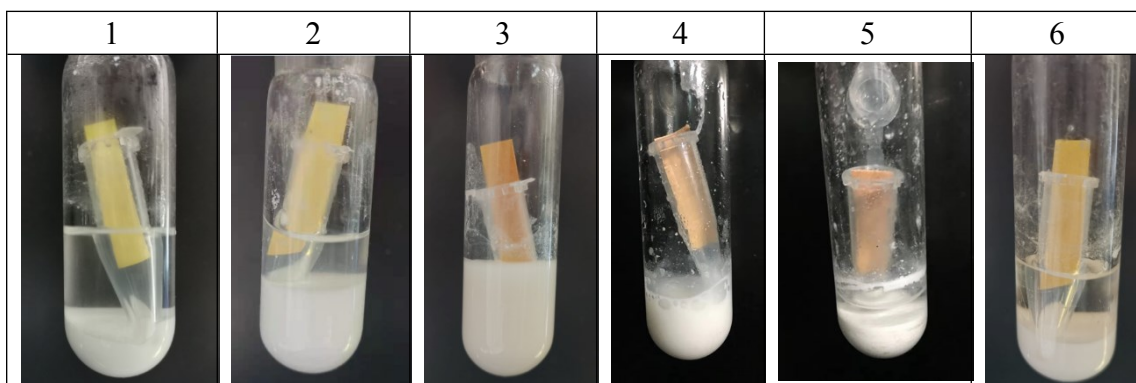

Rose-red color indicating  $\text{CN}^-$  generation, no change in color indicating no  $\text{CN}^-$ .

## 4.2 The Exclusion of the Path Involving

### 4.2.1 The Preparation of **3a**

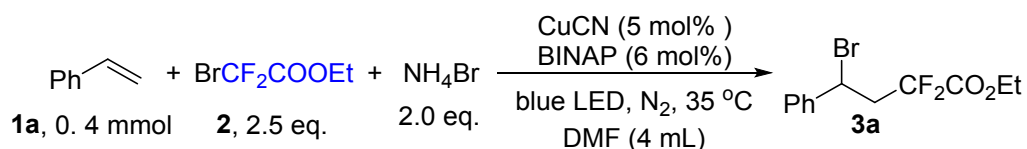

Into a 15 mL Schlenk tube were added CuCN (1.8 mg, 0.02 mmol, 5 mol %), binap (14.9 mg, 0.024 mmol, 6 mol %),  $\text{NH}_4\text{Br}$  (78.3 mg, 0.8 mmol, 2 equiv.) and DMF (4 mL) under a  $\text{N}_2$  atmosphere. Then the alkene substrate **1a** (41.6 mg, 0.4 mmol, 1.0 equiv.) and  $\text{BrCF}_2\text{CO}_2\text{Et}$  (203.0 mg, 1.0 mmol, 2.5 equiv.) were added. The resulting mixture was stirred at 35 °C and irradiated with blue LEDs for 12 h under a  $\text{N}_2$  atmosphere. When the reaction was completed, as monitored by  $^{19}\text{F}$  NMR spectroscopy, the crude reaction mixture was diluted with EA (20 mL). The solution was washed with water (3×20 mL) and brine (20 mL), and then dried over anhydrous  $\text{Na}_2\text{SO}_4$  and evaporated under reduced pressure. The residue was subjected to flash column chromatography (1%→2% ethyl acetate/petroleum ether) to give the final product **3a**.

104.1 mg, 85 % yield; colorless oil;  $^1\text{H}$  NMR (400 MHz,  $\text{CDCl}_3$ )  $\delta$  7.41 (dd,  $J$  = 8.1, 1.4 Hz, 2H), 7.39 – 7.28 (m, 3H), 5.18 (t,  $J$  = 7.3 Hz, 1H), 4.10 (q,  $J$  = 7.1 Hz, 2H), 3.27 – 3.04 (m, 2H), 1.28 (t,  $J$  = 7.2 Hz, 3H);  $^{19}\text{F}$  NMR (376 MHz,  $\text{CDCl}_3$ )  $\delta$  -103.93 (dt,  $J$  = 265.8, 14.7 Hz, 1F), -104.67 (dt,  $J$  = 265.8, 14.7 Hz, 1F);  $^{13}\text{C}$  NMR (101 MHz,  $\text{CDCl}_3$ )  $\delta$  163.2 (t,  $J$  = 32.1 Hz), 140.4 (s), 129.1 (s), 128.9 (s), 127.4 (s),



114.3 (t,  $J = 252.3$  Hz), 63.2 (s), 44.57 (t,  $J = 24.0$  Hz), 44.55 (t,  $J = 5.6$  Hz), 13.8 (s);  
**HRMS (FI)**: Calcd. For  $C_{12}H_{13}^{79}BrF_2O_2$  ( $[M]^+$ ): 306.0062; Found: 306.0064; **IR**  
**(KBr)**: 2964, 1766, 1455, 1433, 1375, 1094, 1024, 798, 696  $cm^{-1}$ .

#### 4.2.2 The Conversion of **3a**

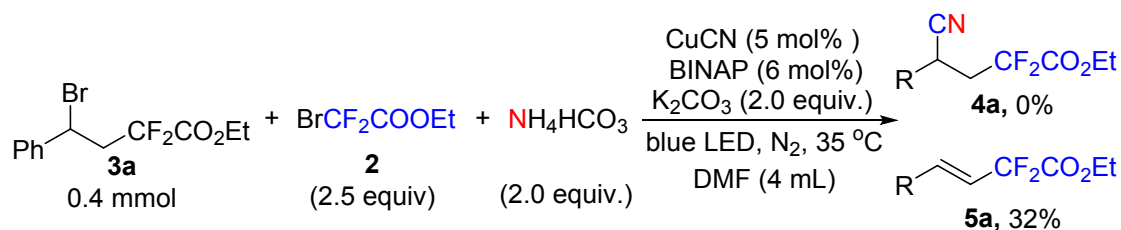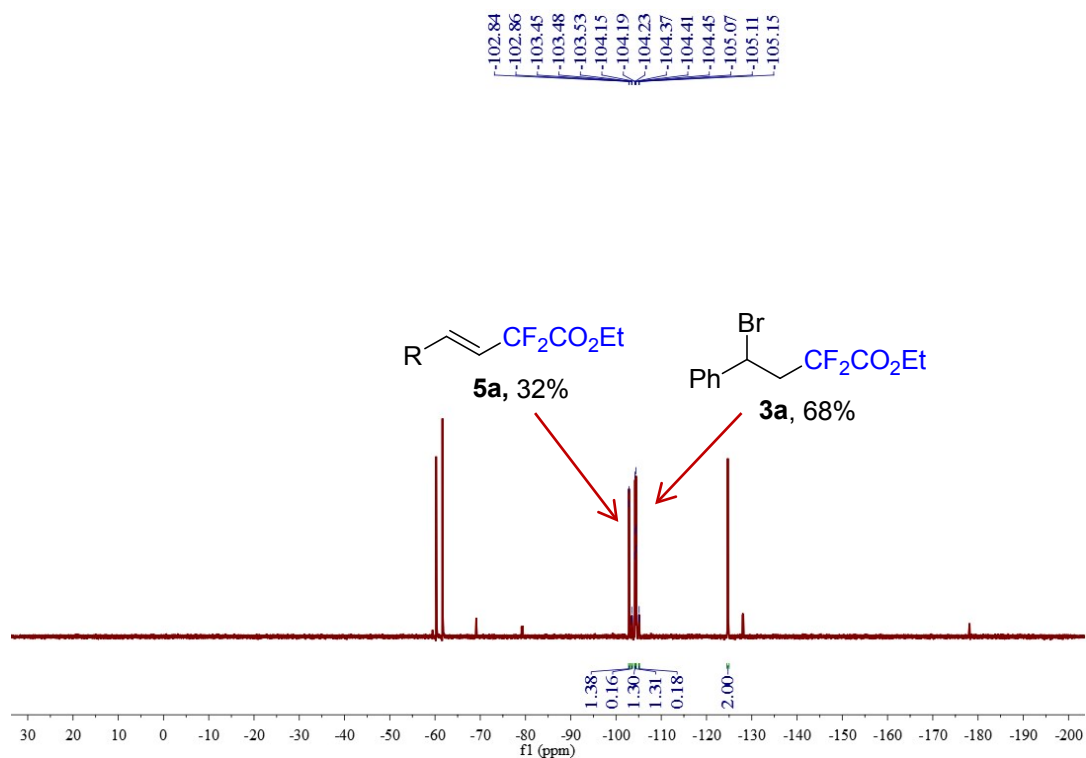

Into a 15 mL Schlenk tube were added  $CuCN$  (1.8 mg, 0.02 mmol, 5 mol %),  $BINAP$  (14.9 mg, 0.024 mmol, 6 mol %),  $NH_4HCO_3$  (63.2 mg, 0.8 mmol, 2 equiv.),  $K_3PO_4$  (169.8 mg, 0.8 mmol, 2 equiv.) and DMF (4 mL) under a  $N_2$  atmosphere. Then substrate **3a** (0.4 mmol, 1.0 equiv.),  $BrCF_2CO_2Et$  (203.0 mg, 1.0 mmol, 2.5 equiv.), DG (134.2 mg, 1.0 mmol, 2.5 equiv.) and  $H_2O$  (21.6 mg, 1.2 mmol, 3 equiv.) were added. The resulting mixture was stirred at 35 °C under the irradiation of 11.5 W blue LEDs for 12 h under a  $N_2$  atmosphere. When the reaction was completed, as monitored by  $^{19}F$  NMR spectroscopy, while 32 % of **3a** was converted to **5a**. The  $^{19}F$

NMR spectrum is shown as follows. Characterization data of 5a<sup>[4]</sup>: <sup>19</sup>F NMR (376 MHz, DMF) δ -102.85 (dd, *J* = 11.2, 2.4 Hz, 2F); MS (EI, *m/z*, %): 226 (M<sup>+</sup>, 13.0), 153 (100.0), 133 (82.0).

### 4.3 Radical Trapping Experiments

Into a 15 mL Schlenk tube were added CuCN (1.8 mg, 0.02 mmol, 5 mol %), BINAP (14.9 mg, 0.024 mmol, 6 mol %), NH<sub>4</sub>HCO<sub>3</sub> (63.2 mg, 0.8 mmol, 2 equiv.), K<sub>3</sub>PO<sub>4</sub> (169.8 mg, 0.8 mmol, 2 equiv.), a radical scavenger (0.4 mmol, 1.0 equiv.) and DMF (4 mL) under a N<sub>2</sub> atmosphere. Then alkene substrate **1a** (41.6 mg, 0.4 mmol, 1.0 equiv.), BrCF<sub>2</sub>CO<sub>2</sub>Et (203.0 mg, 1.0 mmol, 2.5 equiv.), DG (134.2 mg, 1.0 mmol, 2.5 equiv.) and H<sub>2</sub>O (21.6 mg, 1.2 mmol, 3 equiv.) were added. The resulting mixture was stirred at 35 °C and irradiated with blue LEDs for 12 h under a N<sub>2</sub> atmosphere. 1-Fluoronaphthalene (0.2 mmol), an internal standard, was added into the reaction mixture for the calculation of the yield of product **4a**.

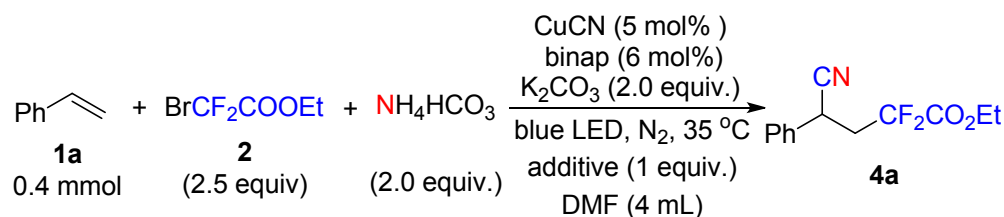

| Entry | additive     | Yield(%) <sup>a</sup> |
|-------|--------------|-----------------------|
| 1     | -            | 85                    |
| 2     | TEMPO        | 0                     |
| 3     | BHT          | 44                    |
| 4     | hydroquinone | trace                 |
| 5     | HOBT         | 22                    |

In the case of TEMPO, <sup>19</sup>F NMR and GC-MS analysis of the reaction mixture revealed that TEMPO-CF<sub>2</sub>CO<sub>2</sub>Et was produced (16% yield determined by <sup>19</sup>F NMR spectroscopy). The <sup>19</sup>F NMR spectrum is shown as follows. Characterization data of TEMPO-CF<sub>2</sub>CO<sub>2</sub>Et<sup>[5]</sup>: <sup>19</sup>F NMR (376 MHz, CDCl<sub>3</sub>) δ -72.0 (s, 2F); MS (EI, *m/z*, %): 279 (M<sup>+</sup>, 1.0), 264 (85.0), 109 (38.0), 69 (50.0), 58 (73.0), 56 (100.0).

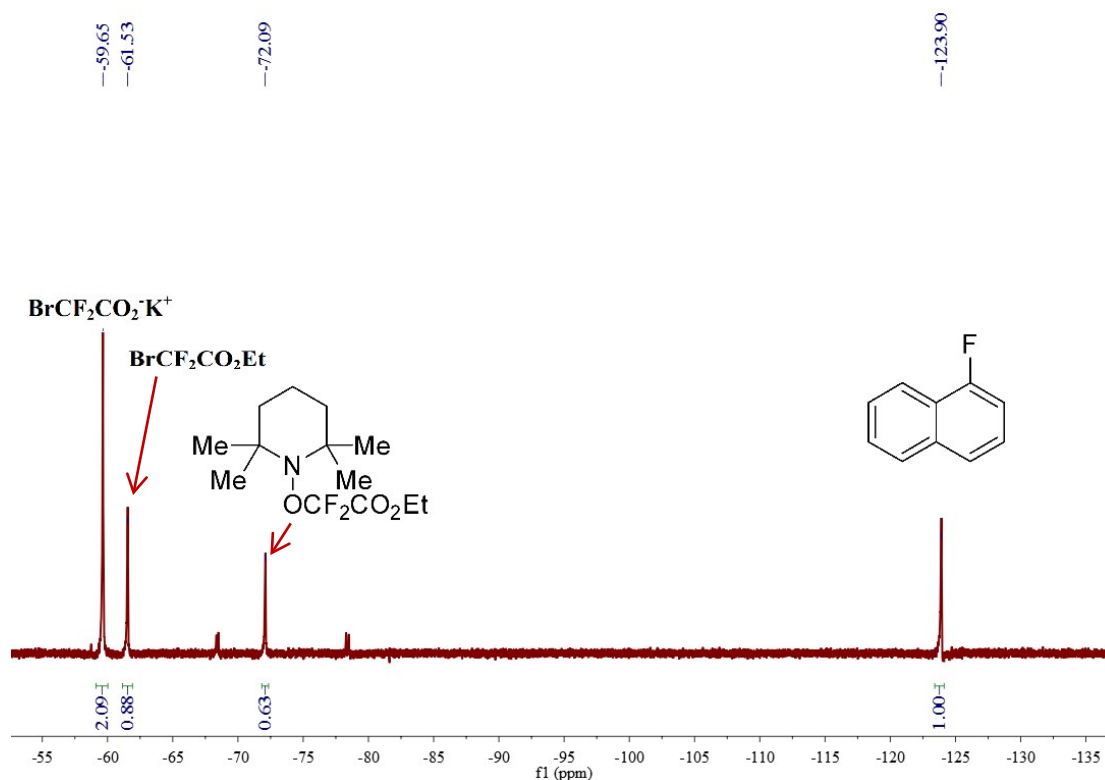

The  $^{19}\text{F}$  NMR of TEMPO- $\text{CF}_2\text{CO}_2\text{Et}$

#### 4.4 UV-Vis absorption experiment

UV-Vis absorption were recorded using UV-3600 UV-VIS-NIR spectrophotometer for all experiments.

Solutions of CuCN in DMF ( $5 \times 10^{-5}$  M), BINAP in DMF ( $5 \times 10^{-5}$  M),  $\text{BrCF}_2\text{CO}_2\text{Et}$  in DMF ( $5 \times 10^{-5}$  M), [CuCN and BINAP] in DMF ( $5 \times 10^{-5}$  and  $5 \times 10^{-4}$  M, respectively) were prepared. Each above solution (3 mL) was added into a screw top 1.0 cm quartz cuvette for UV-Vis absorption experiment. For CuCN, BINAP and  $\text{BrCF}_2\text{CO}_2\text{Et}$ , the absorption was less than 300 nm wavelength. Only the in situ generated (BINAP)-CuCN complex has absorptions in the visible-light range.

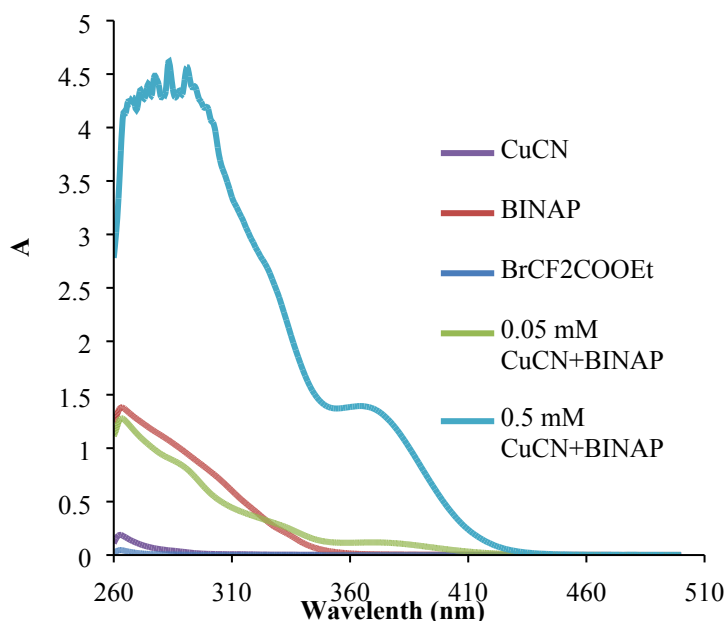

**Scheme S1.** UV-vis absorption spectra of CuCN (0.05 mM), BrCF<sub>2</sub>CO<sub>2</sub>Et (0.05 mM), BINAP (0.05 mM), the in-situ-generated (BINAP)-CuCN (0.5 and 0.05 mM, CuCN: BINAP = 1:1) in DMF.

#### 4.5 Stern–Volmer Measurements

Emission intensities were recorded using HITACHI F-2700 fluorescence spectrometer for all experiments. All [CuCN and BINAP] solutions were excited at 370 nm and emission intensity at 516 nm was collected.

Typical procedure for the preparation of a sample: Into a solution of [CuCN and BINAP] in DMF ( $5 \times 10^{-5}$  M, 5 mL) was added BrCF<sub>2</sub>CO<sub>2</sub>Et (2.0 mg, 0.01 mmol) under a N<sub>2</sub> atmosphere. 3 mL of the resulting solution (the concentration of BrCF<sub>2</sub>CO<sub>2</sub>Et was 2.0 mM) was added into a screw top 1.0 cm quartz cuvette under a N<sub>2</sub> atmosphere.

The emission spectra of five samples containing varied concentration of BrCF<sub>2</sub>CO<sub>2</sub>Et (0, 2.0 mM, 4.0 mM, 6.0 mM and 8.0 mM) were collected.  $I_0$  is the luminescence intensity without the quencher and  $I$  is the intensity with the quencher. The emission quenching of [CuCN and BINAP] indicated that the photoexcited complex (BINAP)-CuCN could be easily quenched by BrCF<sub>2</sub>CO<sub>2</sub>Et.

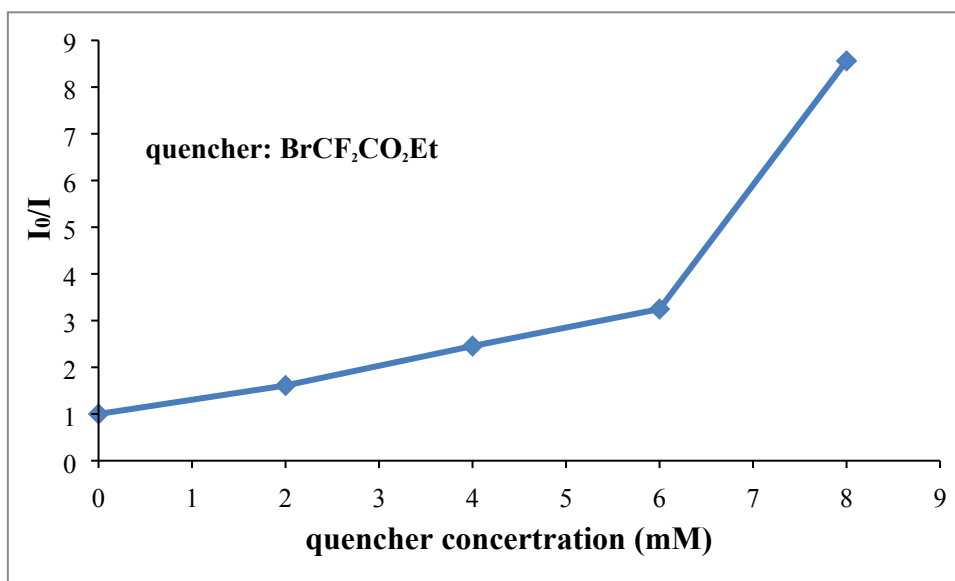

Scheme S2. [CuCN and BINAP] emission quenching with BrCF<sub>2</sub>COOEt

## 5. The Transformations of 4a

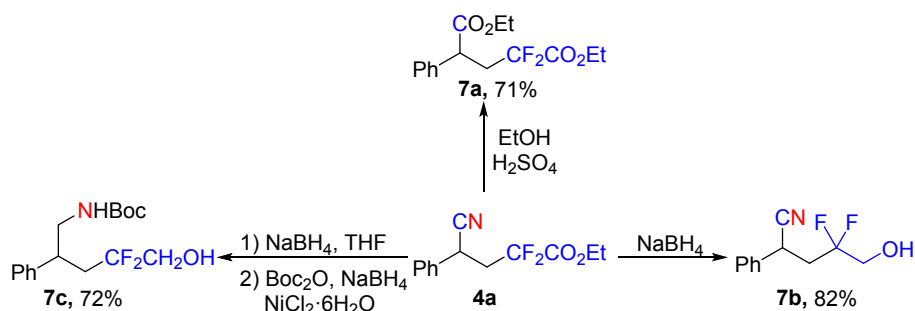

**The Procedure for the preparation of 7a:** To a stirring solution of **4a** (101.3 mg, 0.4 mmol) in EtOH (0.90 mL) was added sulfuric acid (0.36 mL) at room temperature. The resulting mixture was stirred at 110 °C for 24 h. After being cooled to roomtemperature, the reaction mixture was quenched with saturated aqueous NaHCO<sub>3</sub> (3 mL) and extracted with CH<sub>2</sub>Cl<sub>2</sub>. The organic solution was washed with brine, dried over Na<sub>2</sub>SO<sub>4</sub>, and filtered. After the solvent was removed under reduced pressure, the residue was subjected to flash column chromatography (ethyl acetate/hexanes = 1/100) to afford the desired product as a yellow oil (85.3 mg, 71% yield). <sup>1</sup>H NMR (400 MHz, CDCl<sub>3</sub>) δ 7.34 – 7.22 (m, 5H), 4.21–4.10 (m, 3H), 4.10 – 4.00 (m, 1H), 3.89 (dd, *J* = 8.4, 5.2 Hz, 1H), 3.13 – 2.95 (m, 1H), 2.56 – 2.39 (m, 1H), 1.27 (t, *J* = 7.2 Hz, 3H), 1.17 (t, *J* = 7.1 Hz, 3H); <sup>19</sup>F NMR (376 MHz, CDCl<sub>3</sub>) δ -104.61 (ddd, *J* = 261.7,

17.9, 13.5 Hz), -106.05 (ddd,  $J = 262.1, 18.0, 16.4$  Hz);  $^{13}\text{C NMR}$  (101 MHz,  $\text{CDCl}_3$ )  $\delta$  172.4 (s), 163.6 (t,  $J = 33.8$  Hz), 137.6 (s), 128.9 (s), 127.81 (s), 127.80 (s), 115.0 (t,  $J = 251.0$  Hz), 63.0 (s), 61.4 (s), 44.9 (t,  $J = 4.2$  Hz), 37.9 (t,  $J = 23.5$  Hz), 14.0 (s), 13.8 (s); **HRMS (FI)**: Calcd. For  $\text{C}_{15}\text{H}_{18}\text{F}_2\text{O}_4$  ( $[\text{M}]^+$ ): 300.1168; Found: 300.1169; **IR (KBr)**: 3032, 2985, 1759, 1738, 1603, 1497, 1456, 1203, 1099, 1018, 731, 699  $\text{cm}^{-1}$ .

**The Procedure for the preparation of 7b<sup>[6]</sup>**: To a solution of **4a** (101.3 mg, 0.4 mmol) in dry THF (6 mL) was added  $\text{NaBH}_4$  (155.3 mg, 4 mmol, 10 equiv) gradually at 0 °C. Then the mixture was stirred under room temperature. After **4a** was consumed completely (detected by TLC), the crude production was diluted with saturated NaCl solution and then extracted with DCM (3 times). The organic layers were combined and concentrated under vacuo. The residue was purified by flash column chromatography (ethyl acetate/hexanes = 1/3) to afford the desired product as a colorless oil (69.3 mg, 82% yield);  $^1\text{H NMR}$  (400 MHz,  $\text{CDCl}_3$ )  $\delta$  7.45 – 7.31 (m, 5H), 4.15 (dd,  $J = 10.0, 4.2$  Hz, 1H), 3.86 – 3.67 (m, 2H), 2.81 – 2.59 (m, 2H), 2.41 (ddd,  $J = 33.7, 15.3, 4.3$  Hz, 1H);  $^{19}\text{F NMR}$  (376 MHz,  $\text{CDCl}_3$ )  $\delta$  -107.44 – -107.73 (m, 2F);  $^{13}\text{C NMR}$  (101 MHz,  $\text{CDCl}_3$ )  $\delta$  135.0 (s), 129.5 (s), 128.7 (s), 127.3 (s), 121.4 (t,  $J = 244.2$  Hz), 120.3 (s), 63.9 (t,  $J = 32.0$  Hz), 39.4 (t,  $J = 24.1$  Hz), 30.7 (t,  $J = 4.4$  Hz); **HRMS (EI)**: Calcd. For  $\text{C}_{15}\text{H}_{20}\text{F}_2\text{O}_2$  ( $[\text{M}]^+$ ): 211.0803; Found: 211.0796; **IR (KBr)**: 3453, 2936, 2248, 1738, 1601, 1497, 1455, 1071, 754, 700  $\text{cm}^{-1}$ .

**The Procedure for the preparation of 7c<sup>[7]</sup>**: To a solution of **4a** (101.3 mg, 0.4 mmol) in dry THF (6 mL) was added  $\text{NaBH}_4$  (151.3 mg, 4 mmol, 10 equiv) gradually at 0 °C. Then the mixture was stirred under room temperature. After **4a** was consumed completely (detected by TLC), the crude production was diluted with saturated NaCl solution and then extracted with DCM (3 times). The organic layers were combined and concentrated under vacuo. The residue was used for the next step without purification. The residue was dissolved in MeOH (8 mL).  $\text{NiCl}_2 \cdot 6\text{H}_2\text{O}$  (2 equiv.) and  $\text{Boc}_2\text{O}$  (6 equiv.) were then added. Into the resulting mixture was added  $\text{NaBH}_4$  (16 equiv) gradually at 0 °C. Then the mixture was stirred at room temperature for 24 h.

The solvent was then removed under reduced pressure, leaving a black precipitate. The precipitate was then dissolved in EtOAc (20 mL) and then washed with brine. The organic phases were dried (Na<sub>2</sub>SO<sub>4</sub>) and concentrated in vacuo. The residue was purified by flash column chromatography (ethyl acetate/hexanes = 1/5) to afford the desired product as colorless oil (113.7 mg, 72% yield). **<sup>1</sup>H NMR** (400 MHz, CDCl<sub>3</sub>) δ 7.33 (t, *J* = 7.3 Hz, 2H), 7.24 (d, *J* = 7.3 Hz, 1H), 7.20 (d, *J* = 7.3 Hz, 2H), 4.51 (br, 1H), 3.69 – 3.57 (m, 1H), 3.58 – 3.46 (m, 2H), 3.23 – 3.08 (m, 2H), 2.91 (br, 1H), 2.40 – 2.21 (m, 2H), 1.39 (s, 9H); **<sup>19</sup>F NMR** (376 MHz, CDCl<sub>3</sub>) δ -103.58 – -106.24 (m, 2F); **<sup>13</sup>C NMR** (101 MHz, CDCl<sub>3</sub>) δ 156.2 (s), 142.1 (s), 128.9 (s), 127.8 (s), 127.2 (s), 123.1 (t, *J* = 195.5 Hz), 79.7 (s), 64.0 (t, *J* = 26.0 Hz), 46.3 (s), 40.0 (s), 36.8 (t, *J* = 20.4 Hz), 28.4 (s); **HRMS (FI)**: Calcd. For C<sub>16</sub>H<sub>23</sub>F<sub>2</sub>NO<sub>3</sub> ([M]<sup>+</sup>): 315.1641; Found: 315.1638; **IR (KBr)**: 3435, 3367, 2977, 2934, 1694, 1603, 1515, 1367, 1172, 1076, 758, 701 cm<sup>-1</sup>.

## 6. References

- [1] Q. Guo, M. Wang, Y. Wang, Z. Xu and R. Wang, *Chem. Commun.*, 2017, **53**, 12317-12320.
- [2] Q. Guo, M. Wang, Q. Peng, Y. Huo, Q. Liu, R. Wang and Z. Xu, *ACS Catal.*, 2019, **9**, 4470 - 4476.
- [3] a) G. Zhang, X. Ren, J. Chen, M. Hu, and J. Cheng, *Org. Lett.* 2011, **13**, 5004-5007; b) J. Kim, J. Choi, K. Shin, S. Chang, *J. Am. Chem. Soc.* 2012, **134**, 2528-2531; c) Y. Zhu, M. Zhao, W. Lu, L. Li, and Z. Shen, *Org. Lett.* 2015, **17**, 2602-2605. d) M. Zhang, J.-H. Lin, J.-C. Xiao, *Angew. Chem. Int. Ed.* 2019, **58**, 6079-6083.
- [4] F. Zhang, Q.-Q. Min, H.-Y. Zhao, J.-W. Gu, and X.-G. Zhang, *Angew. Chem. Int. Ed.* 2015, **54**, 4, 1270-1274.
- [5] A. Prieto, R. Melot, D. Bouyssi and N. Monteiro, *Angew. Chem. Int. Ed.* 2016, **55**, 1885-1889.
- [6] W. Kong, C. Yu, H. An and Q. Song, *Org. Lett.* 2018, **20**, 4975-4978.
- [7] S. Caddick, A. K. Haynes, D. B. Judd, M. R. V. Williams, *Tetrahedron Lett.* 2000,

41, 3513-3516.



## 7. Copies of $^1\text{H}$ NMR, $^{19}\text{F}$ NMR and $^{13}\text{C}$ NMR Spectra of Products

### $^1\text{H}$ NMR Spectrum of **4a**

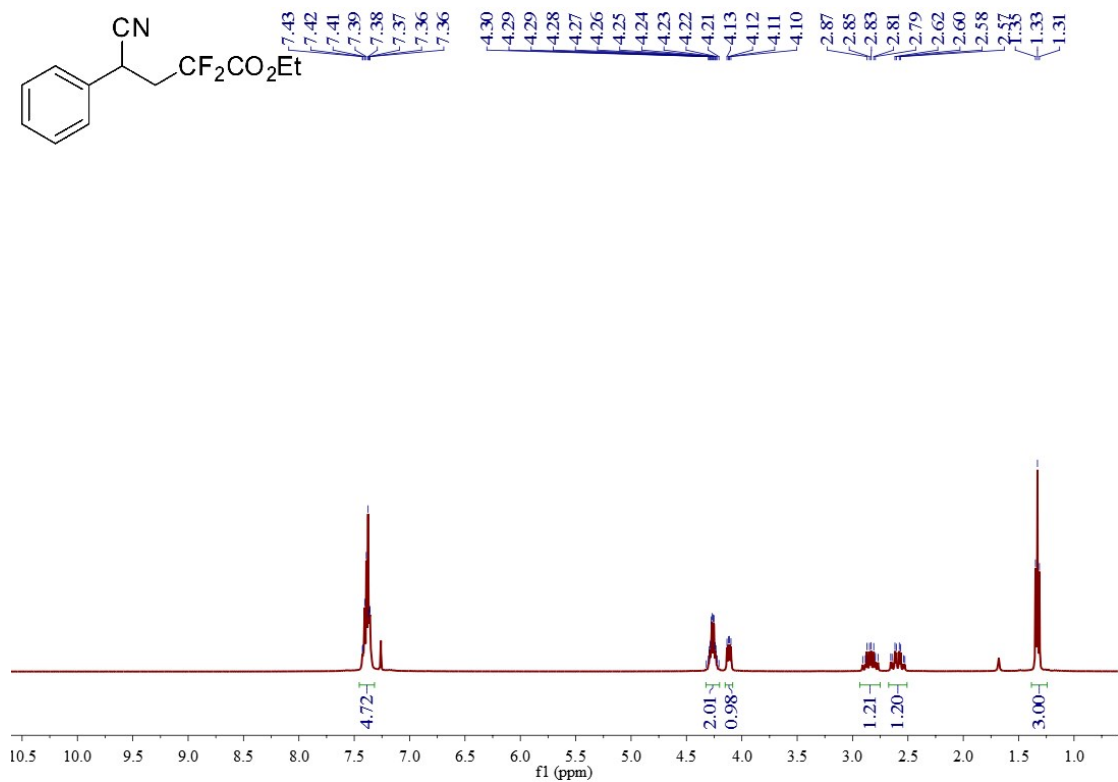

### $^{19}\text{F}$ NMR Spectrum of **4a**

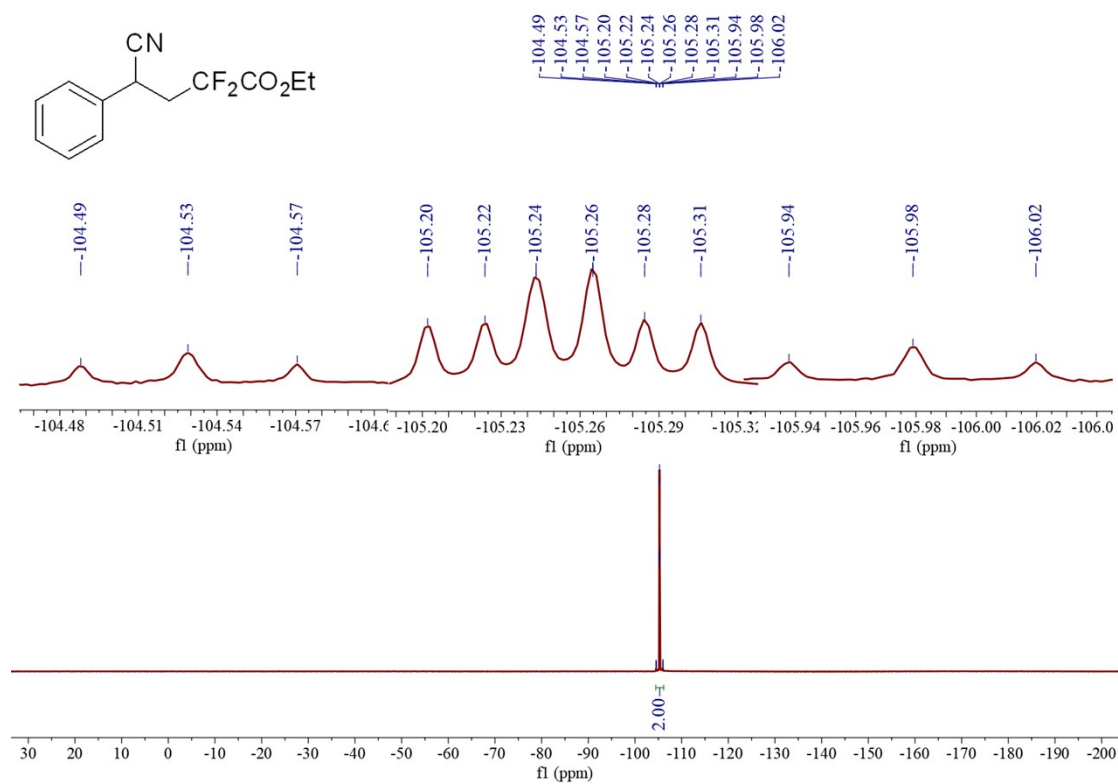

### <sup>13</sup>C NMR Spectrum of 4a

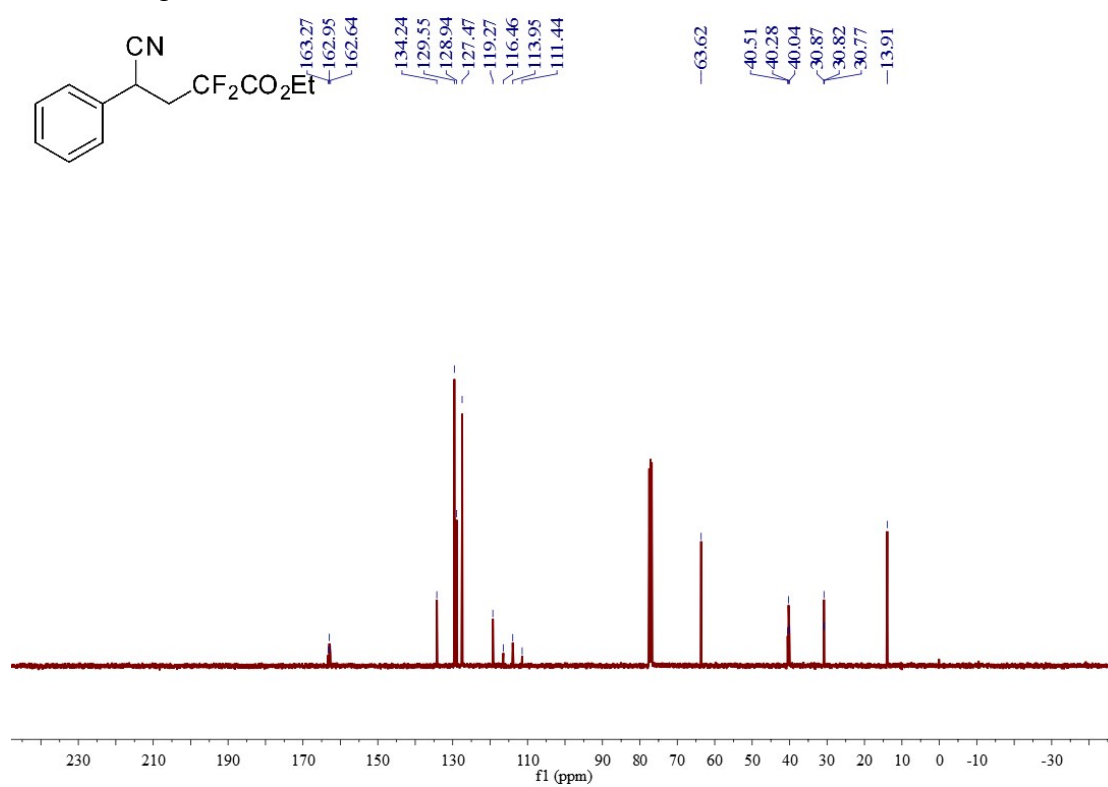

### <sup>1</sup>H NMR Spectrum of 4b

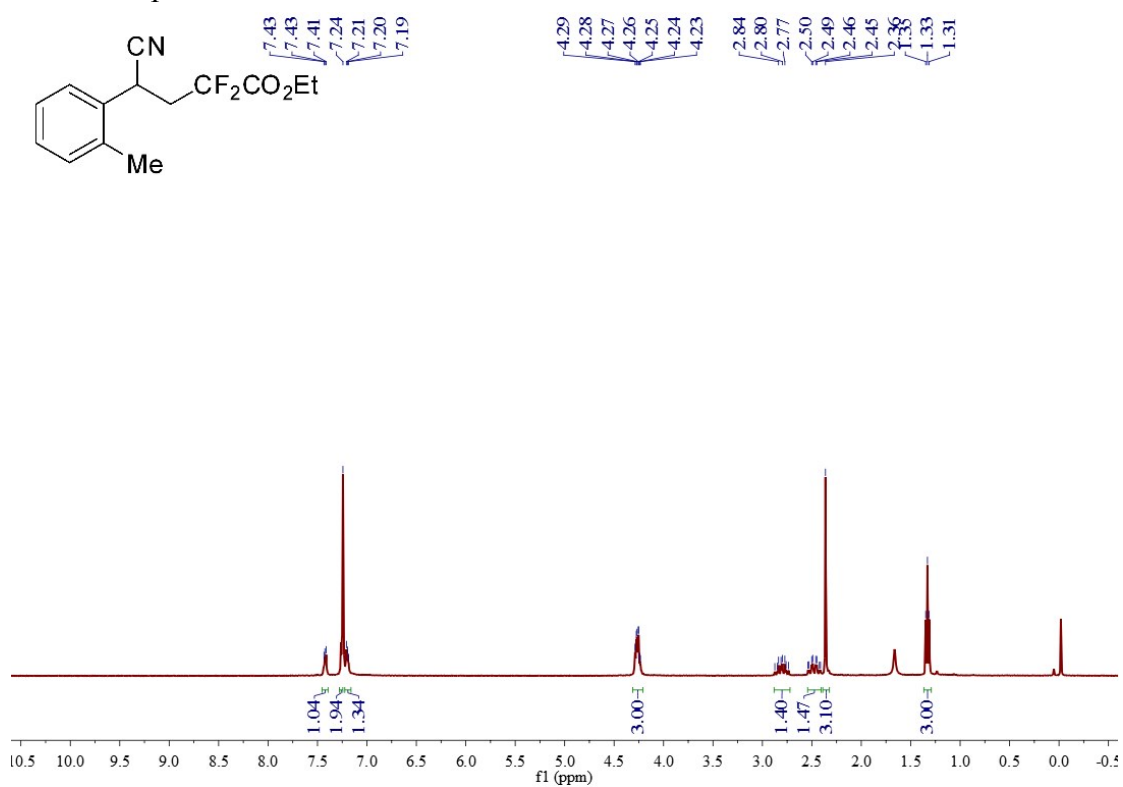

### <sup>19</sup>F NMR Spectrum of **4b**

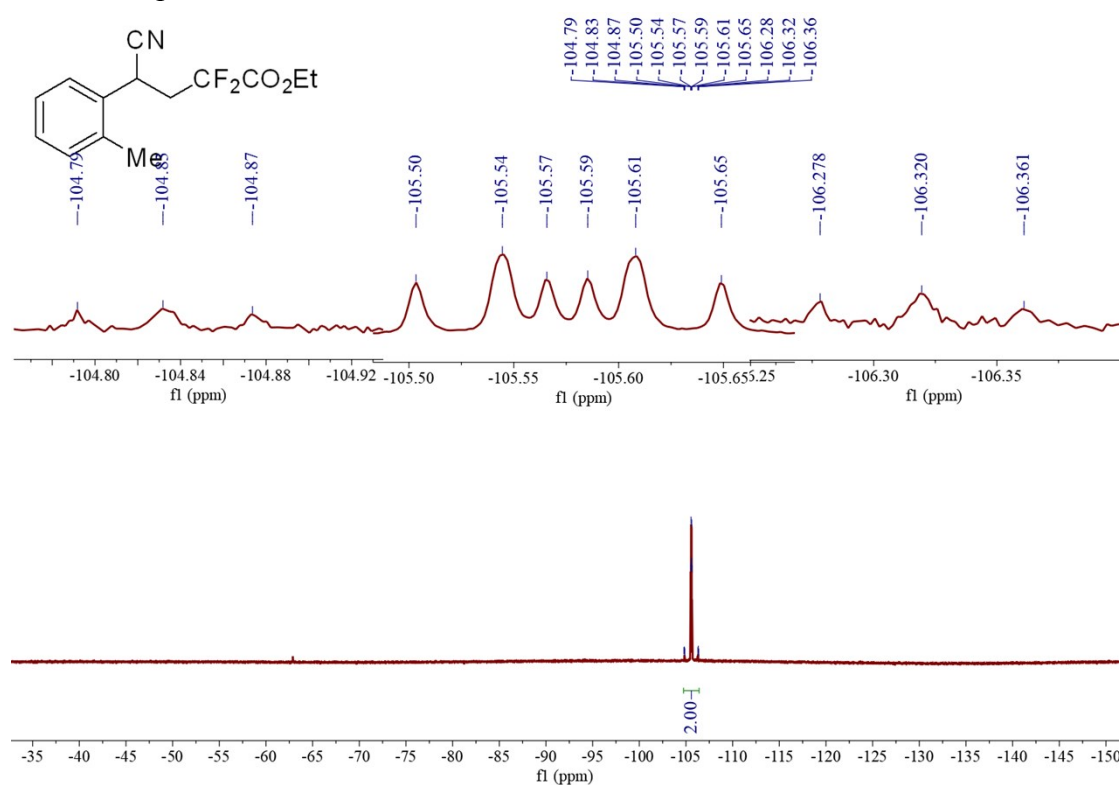

### <sup>13</sup>C NMR Spectrum of **4b**

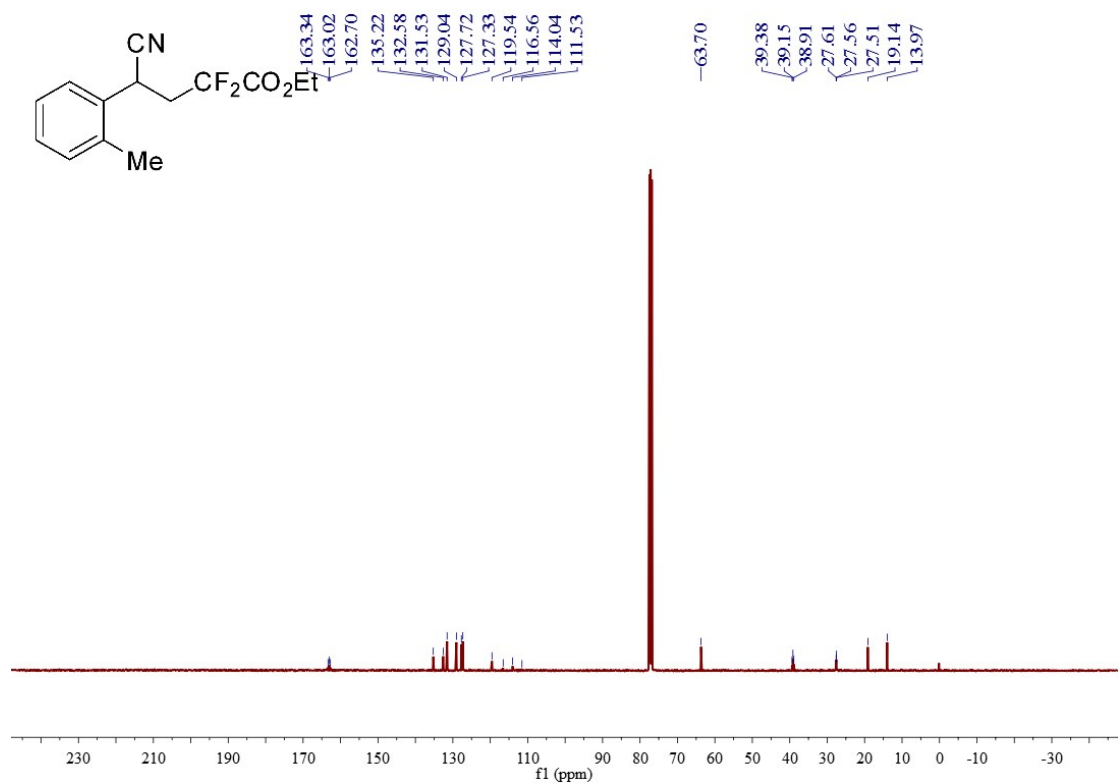

### <sup>1</sup>H NMR Spectrum of **4c**

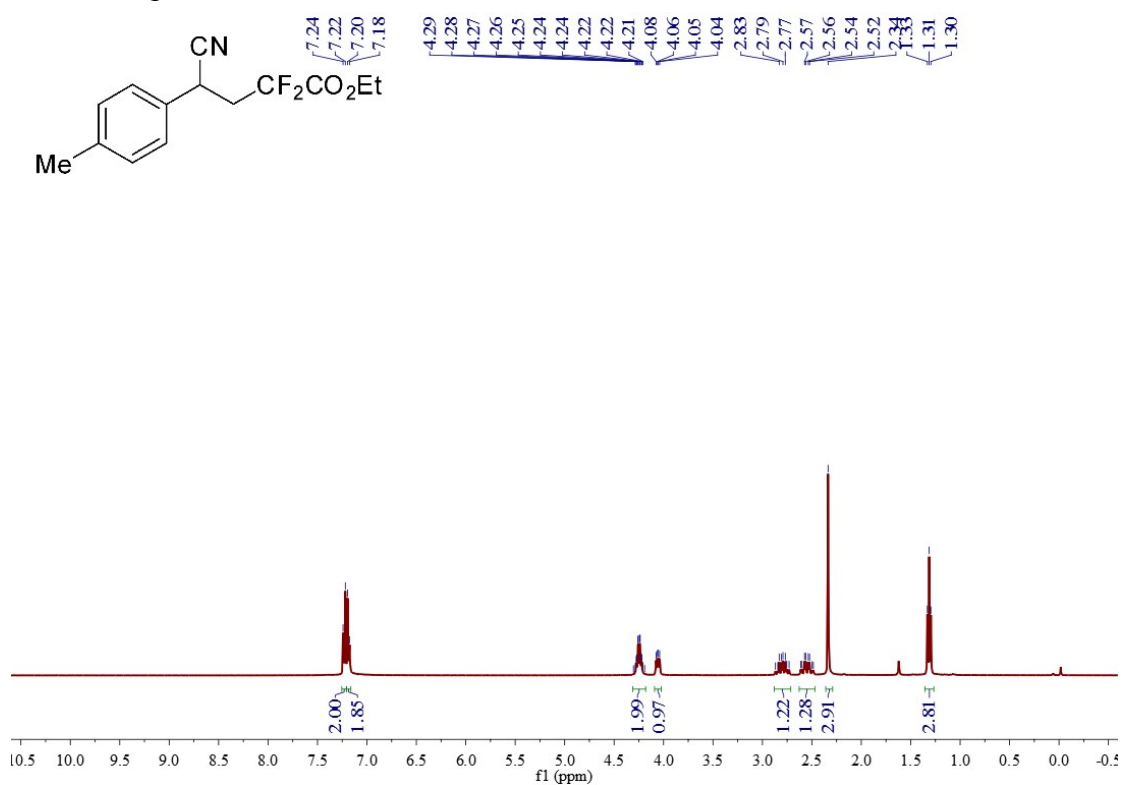

### <sup>19</sup>F NMR Spectrum of **4c**

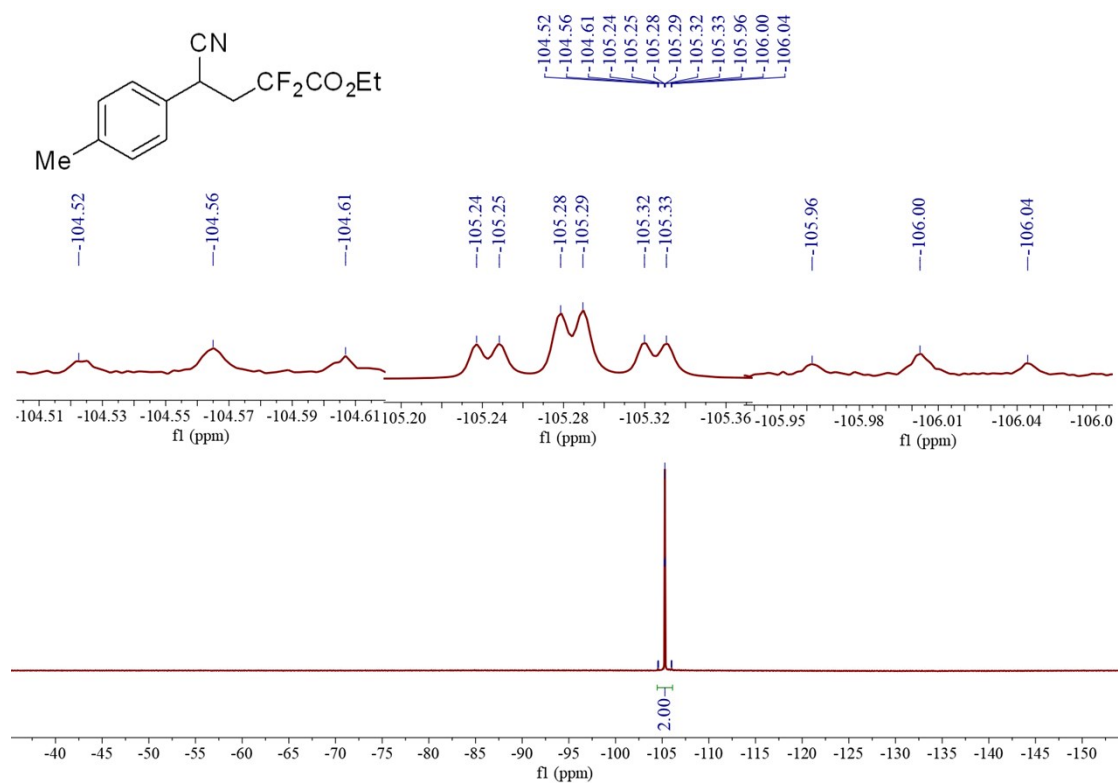

### <sup>13</sup>C NMR Spectrum of 4c

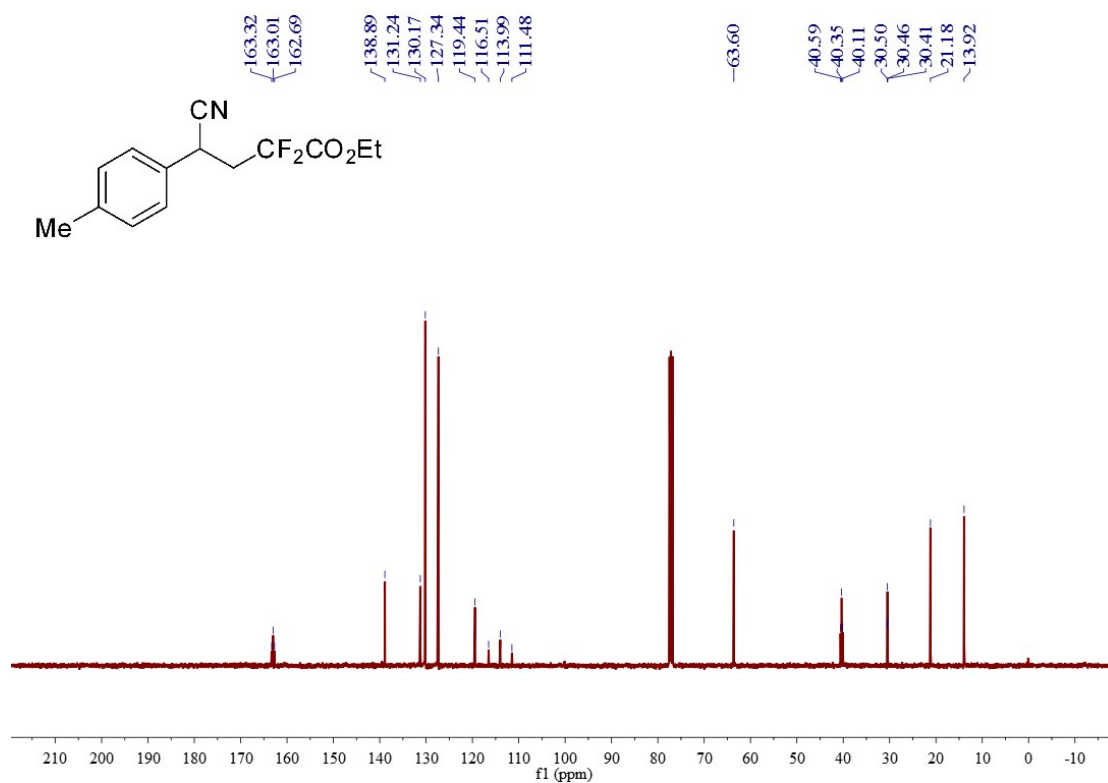

### <sup>1</sup>H NMR Spectrum of 4d

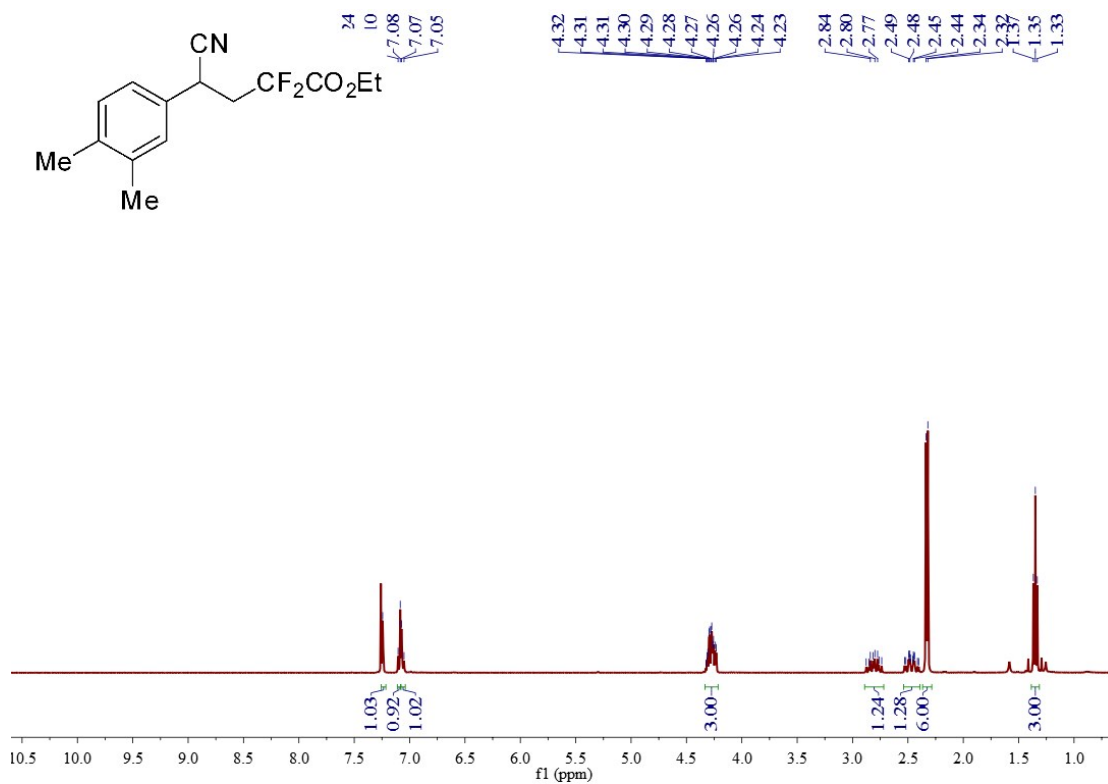

### <sup>19</sup>F NMR Spectrum of **4d**

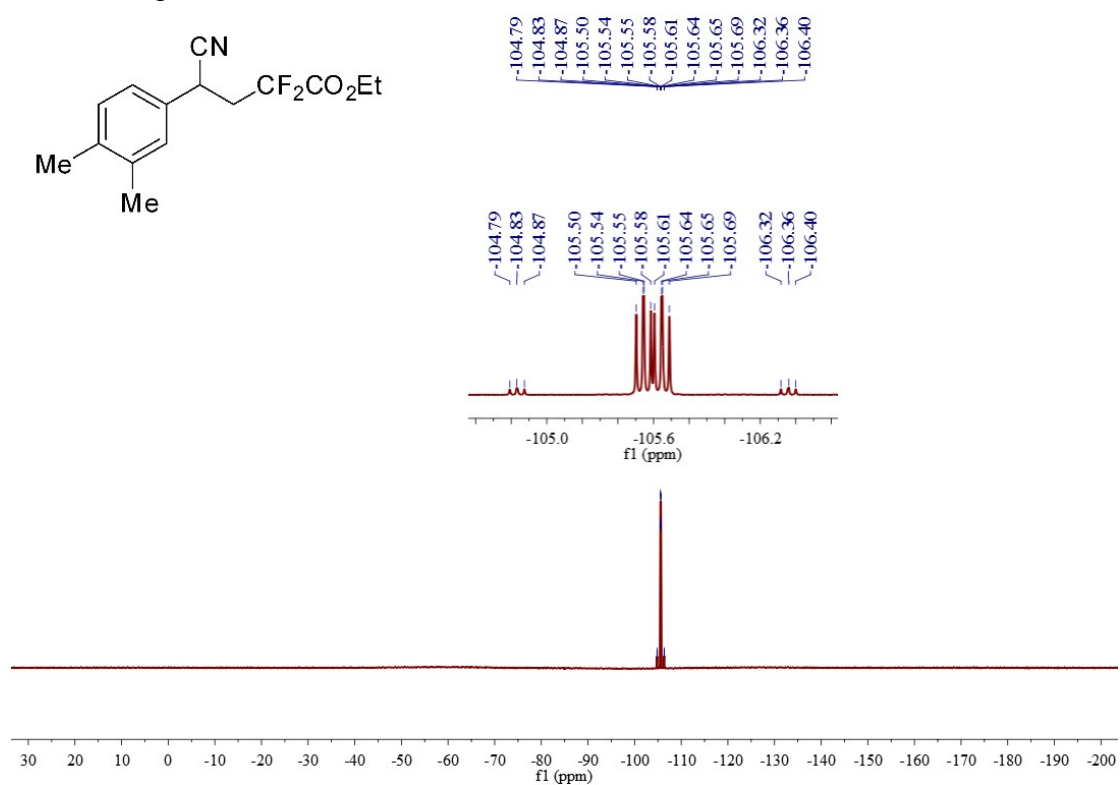

### <sup>13</sup>C NMR Spectrum of **4d**

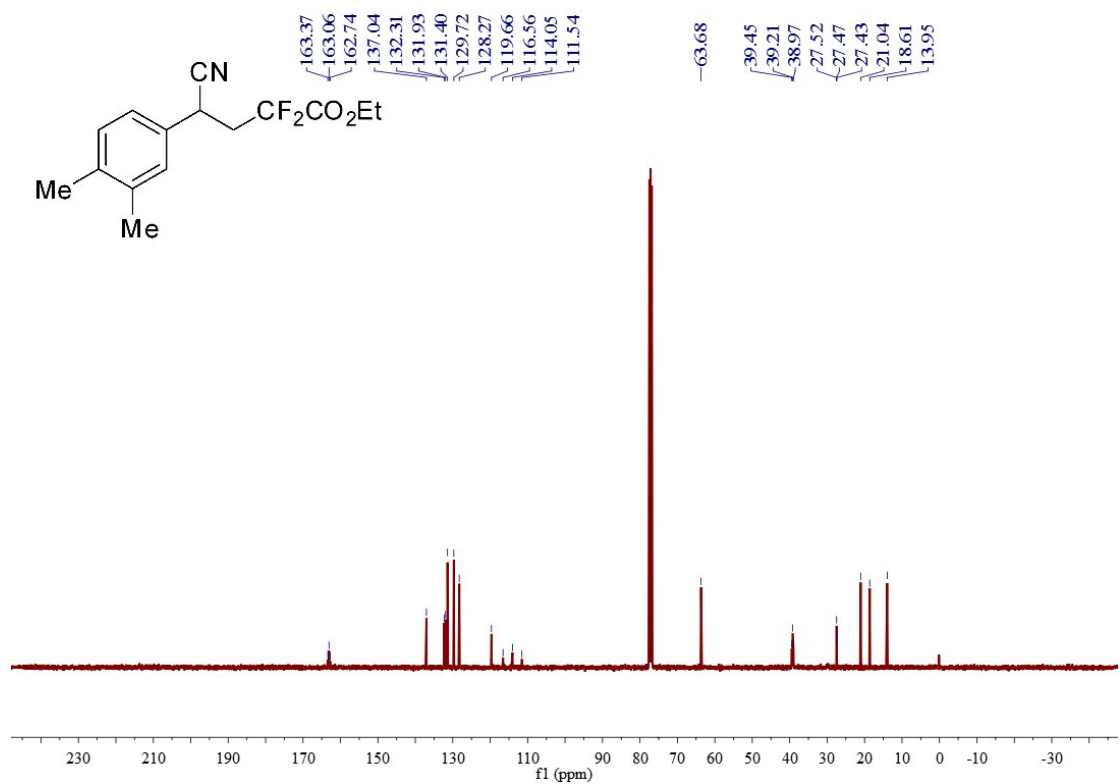

### <sup>1</sup>H NMR Spectrum of 4e

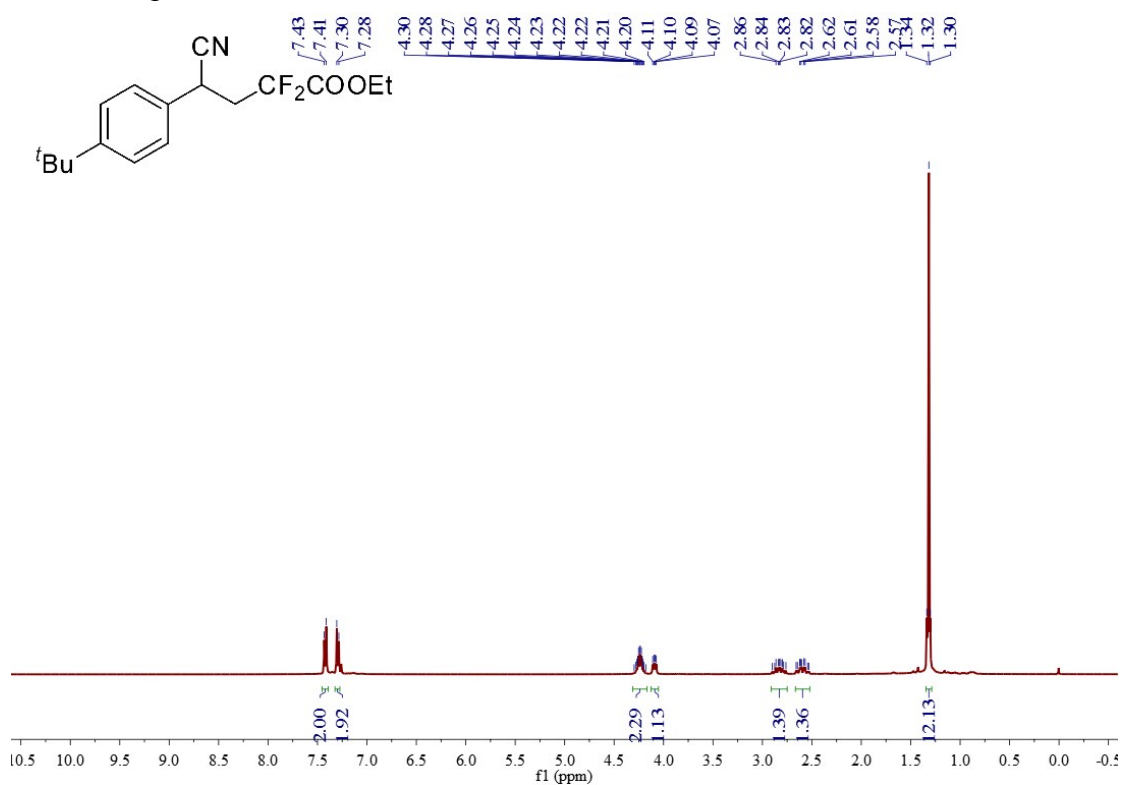

### <sup>19</sup>F NMR Spectrum of 4e

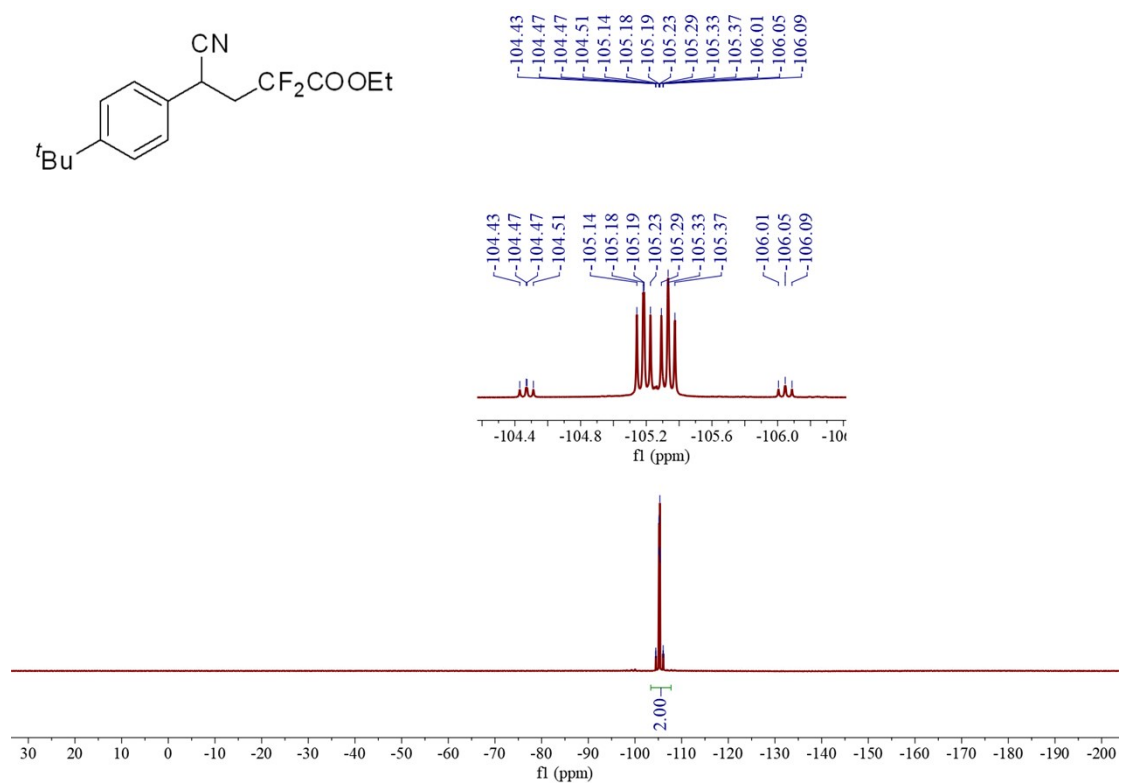

### $^{13}\text{C}$ NMR Spectrum of **4e**

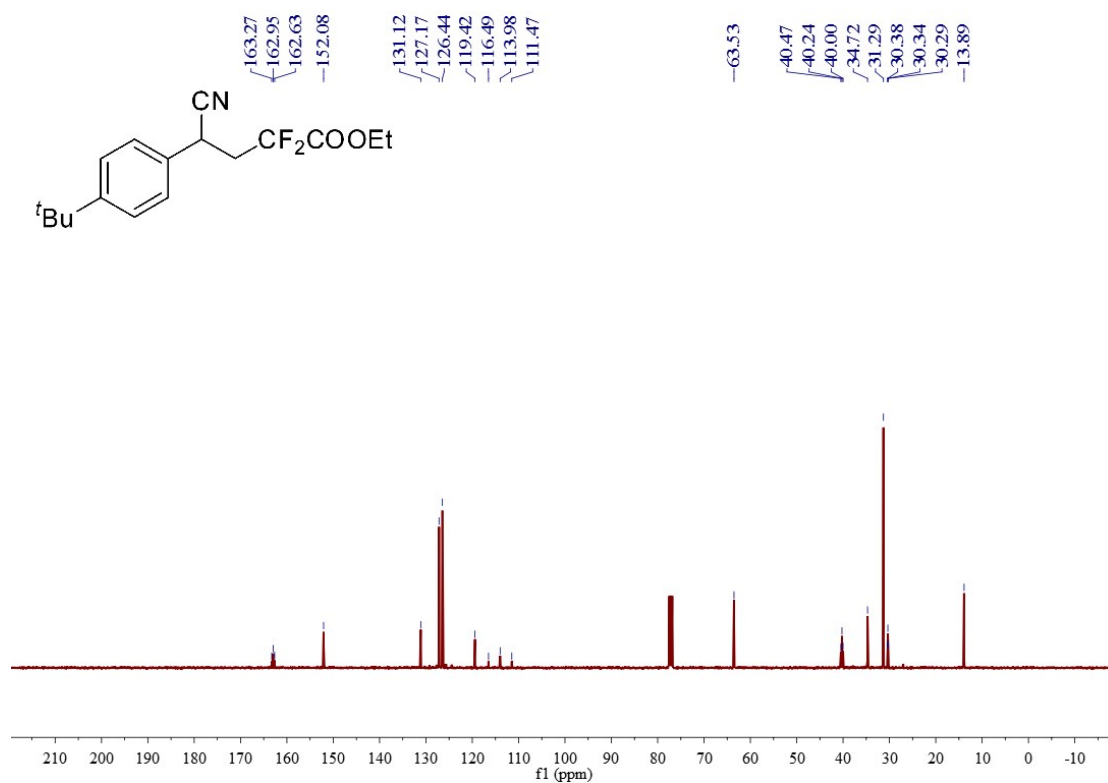

### $^1\text{H}$ NMR Spectrum of **4f**

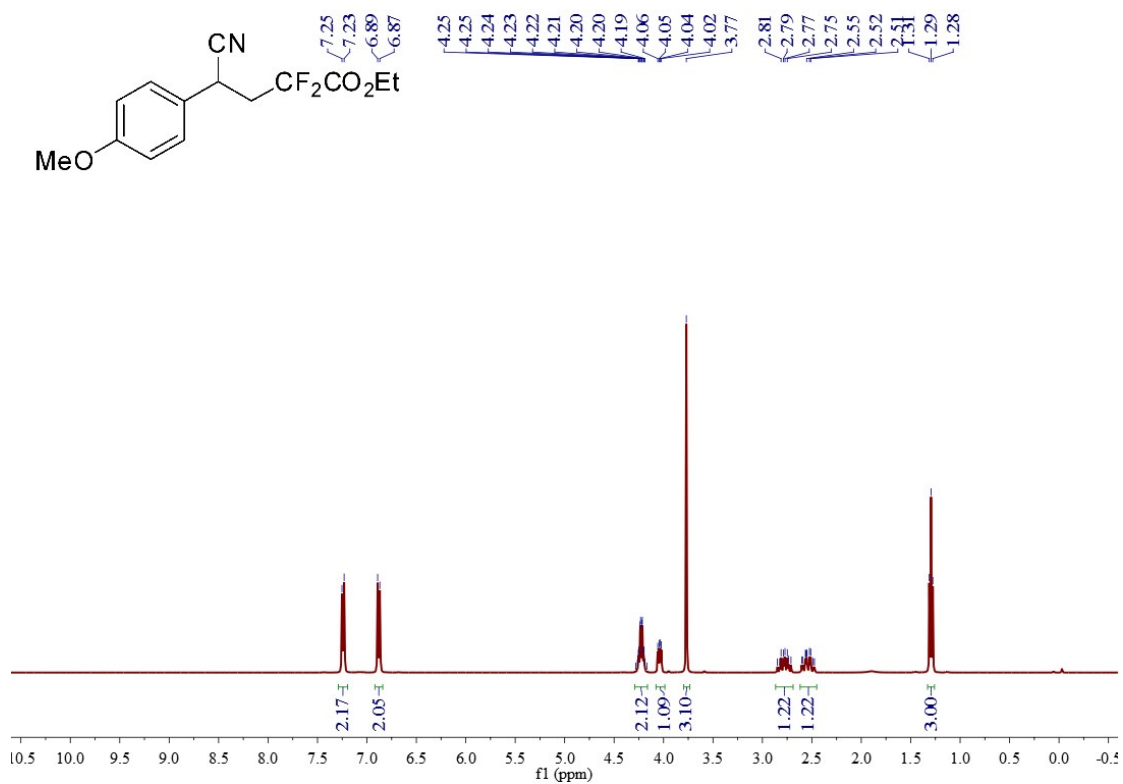



### <sup>19</sup>F NMR Spectrum of 4f

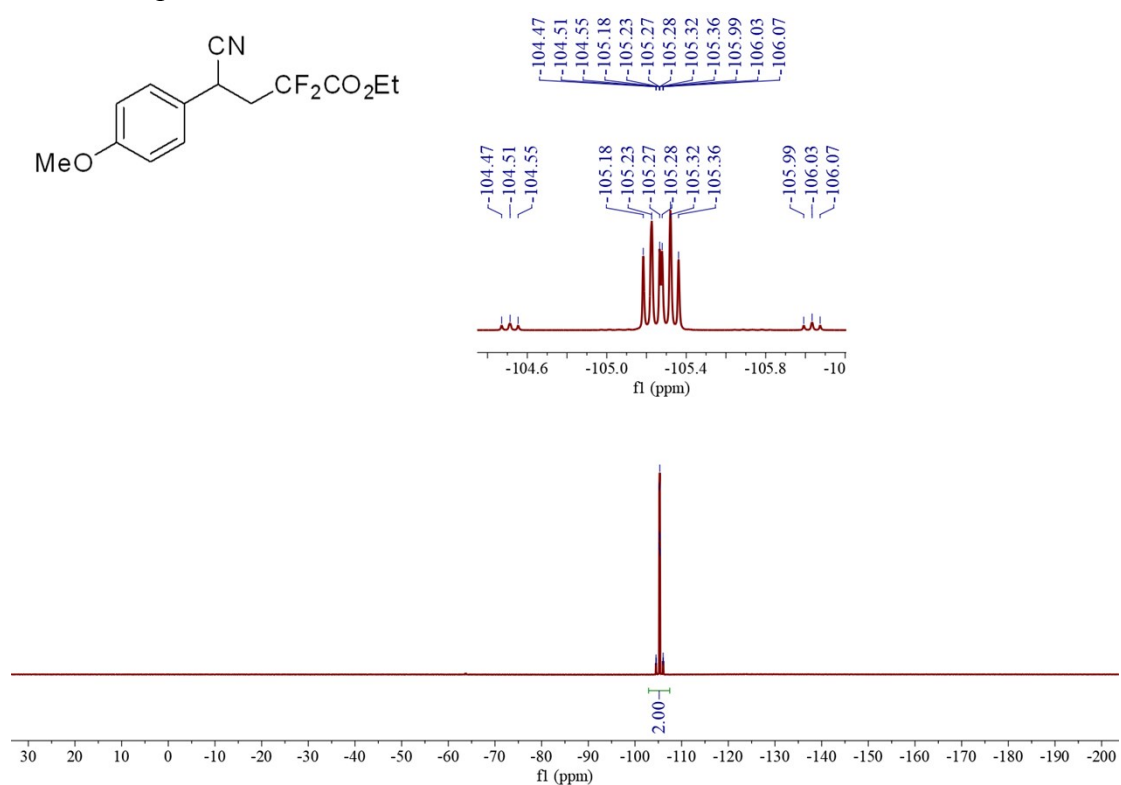

### <sup>13</sup>C NMR Spectrum of 4f

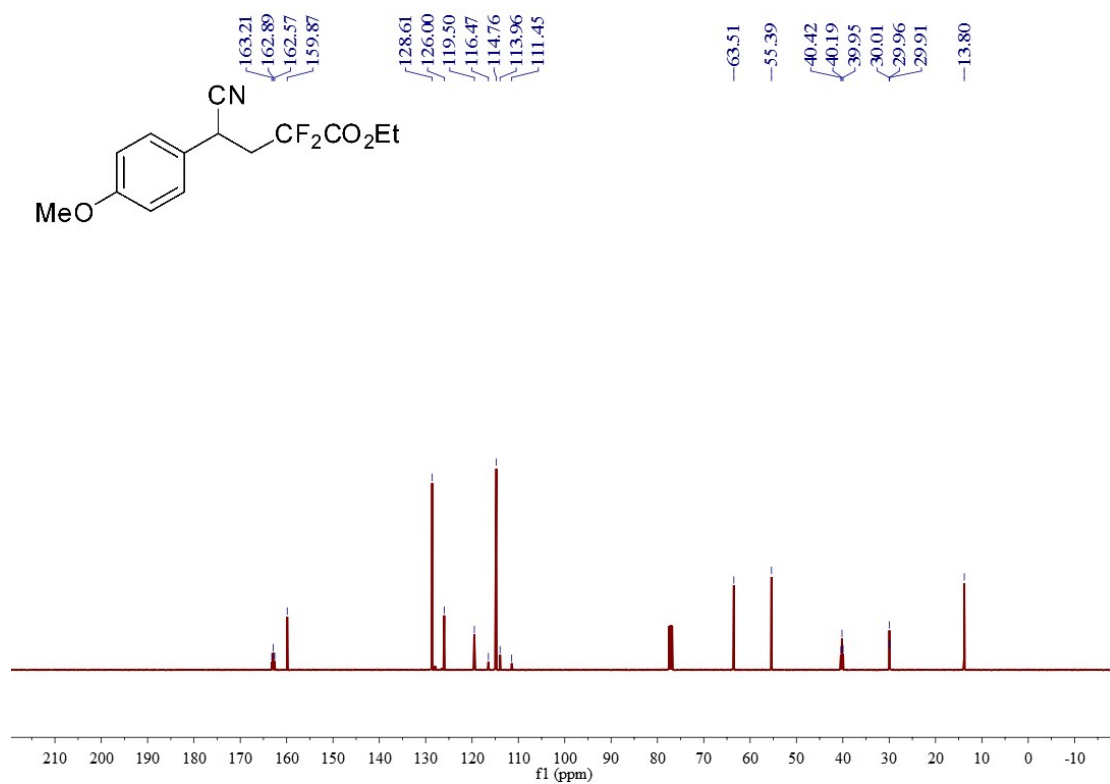

<sup>1</sup>H NMR Spectrum of **4g**

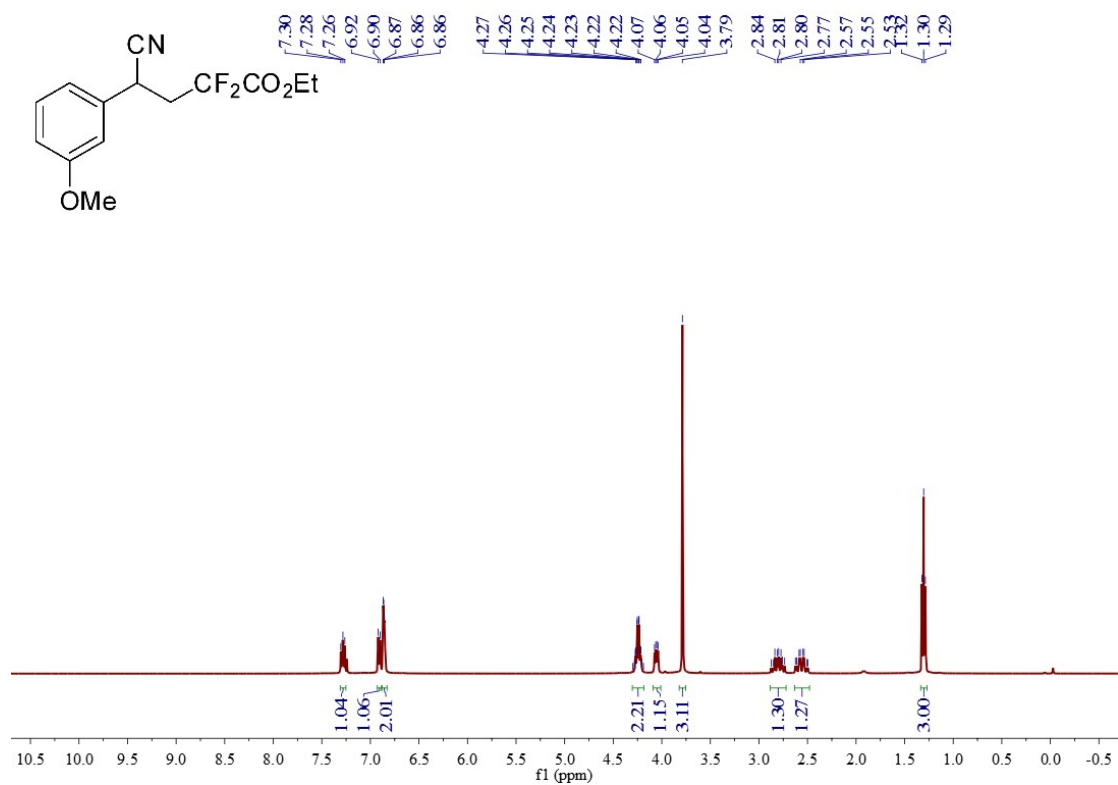

<sup>19</sup>F NMR Spectrum of **4g**

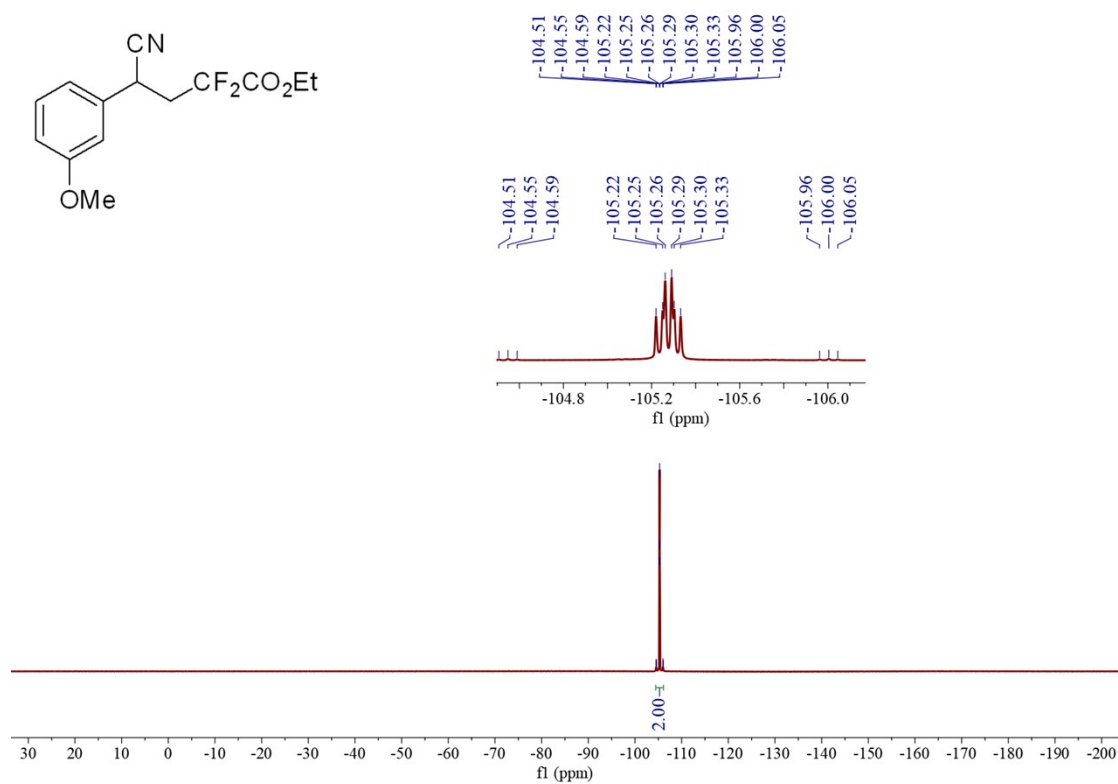

### <sup>13</sup>C NMR Spectrum of **4g**

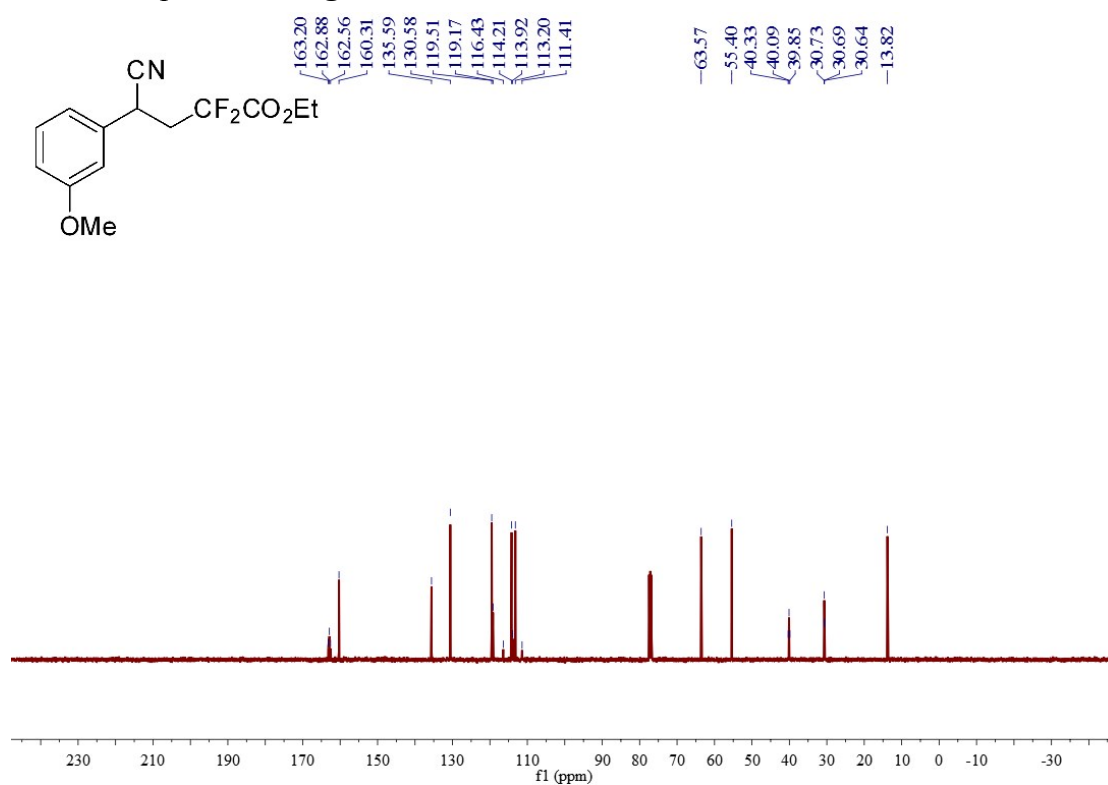

### <sup>1</sup>H NMR Spectrum of **4h**

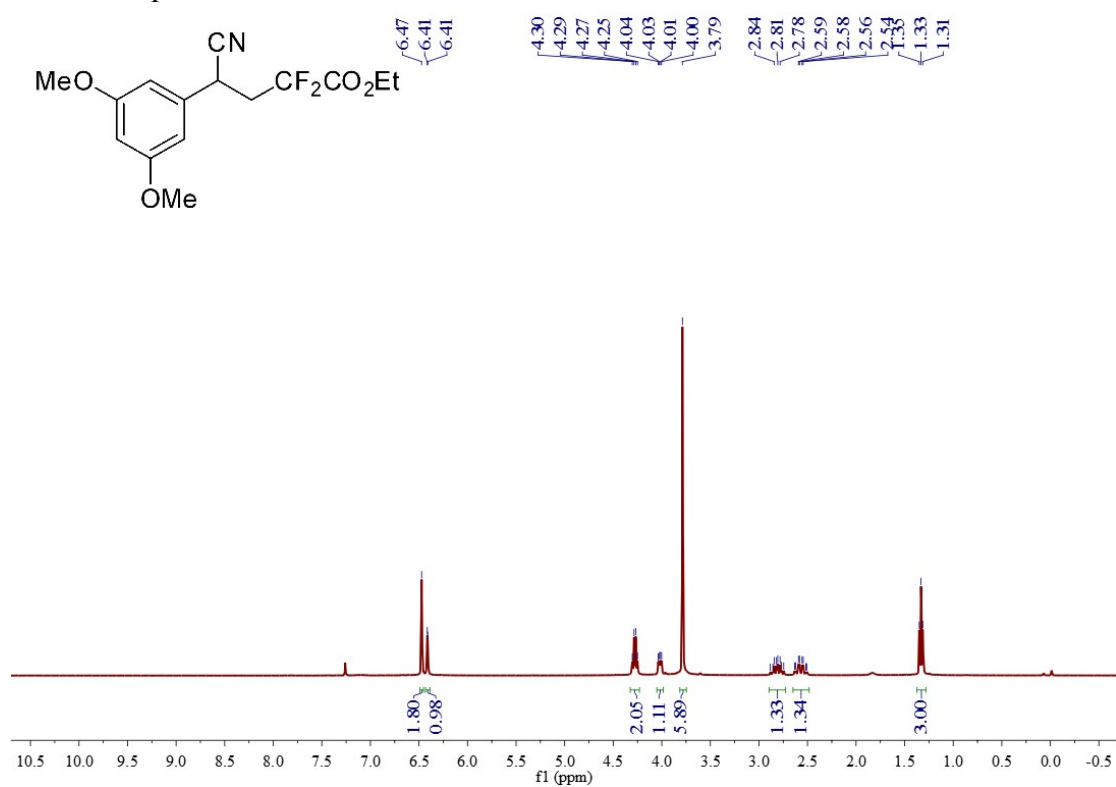

### <sup>19</sup>F NMR Spectrum of **4h**

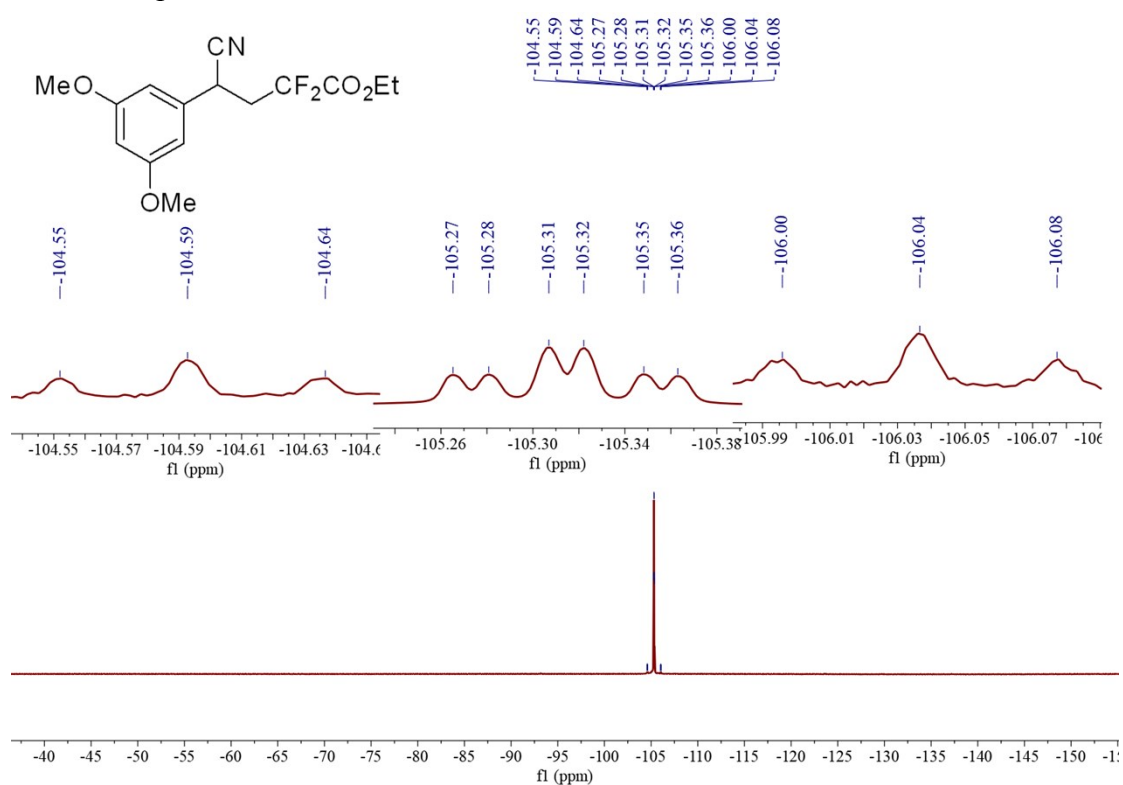

### <sup>13</sup>C NMR Spectrum of **4h**

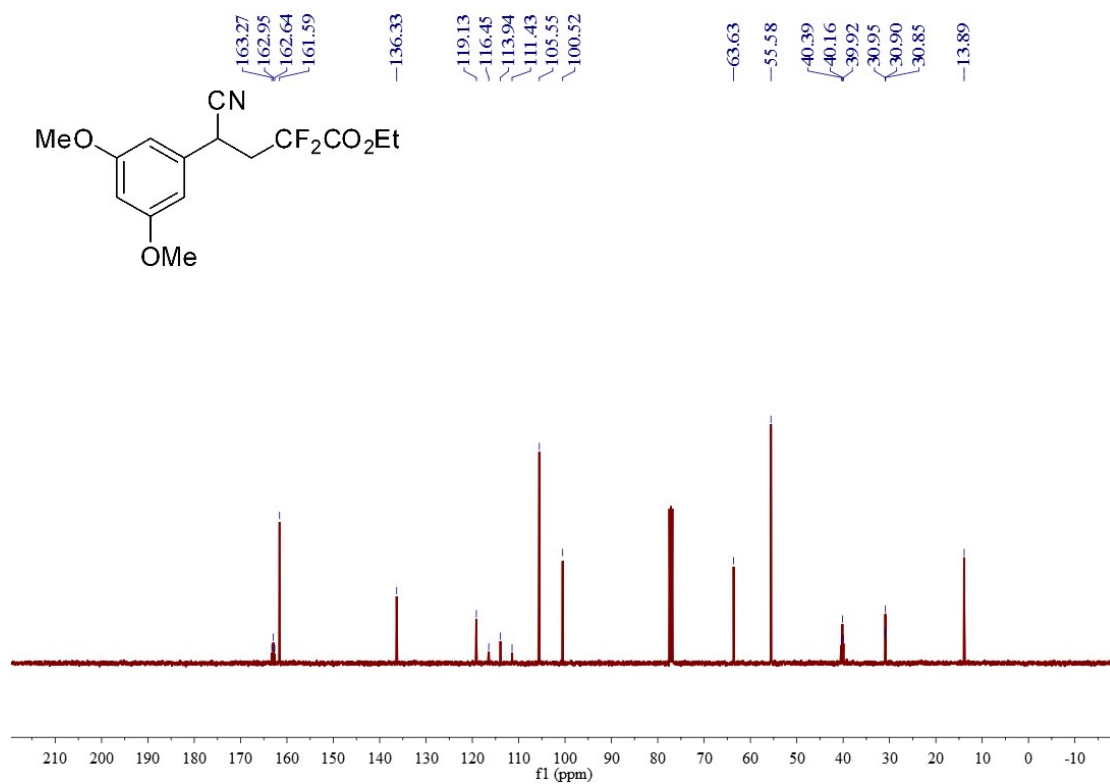

### <sup>1</sup>H NMR Spectrum of **4i**

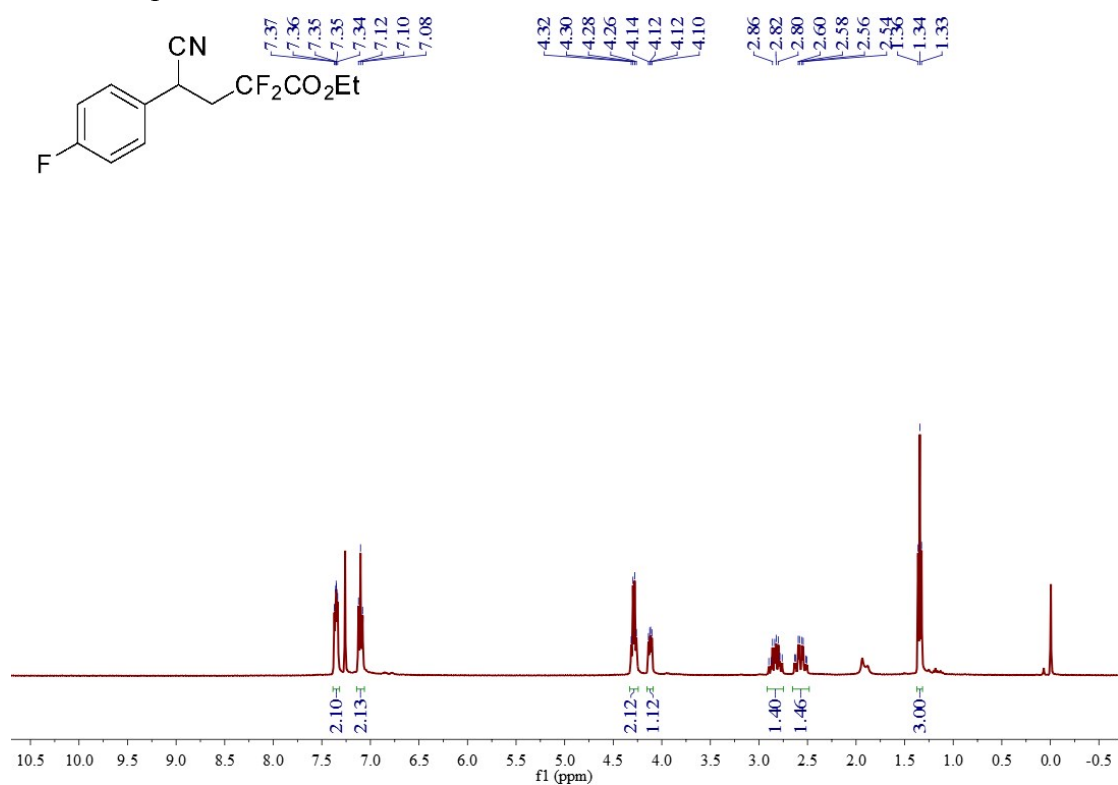

### <sup>19</sup>F NMR Spectrum of **4i**

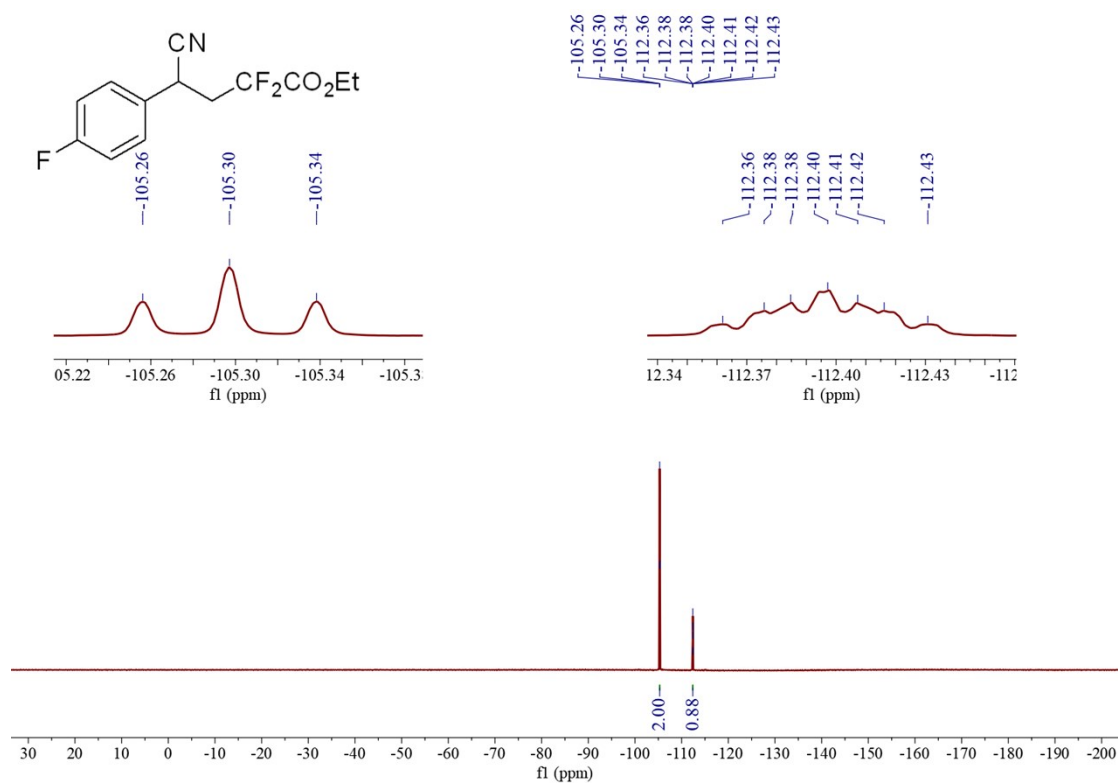

### <sup>13</sup>C NMR Spectrum of **4i**

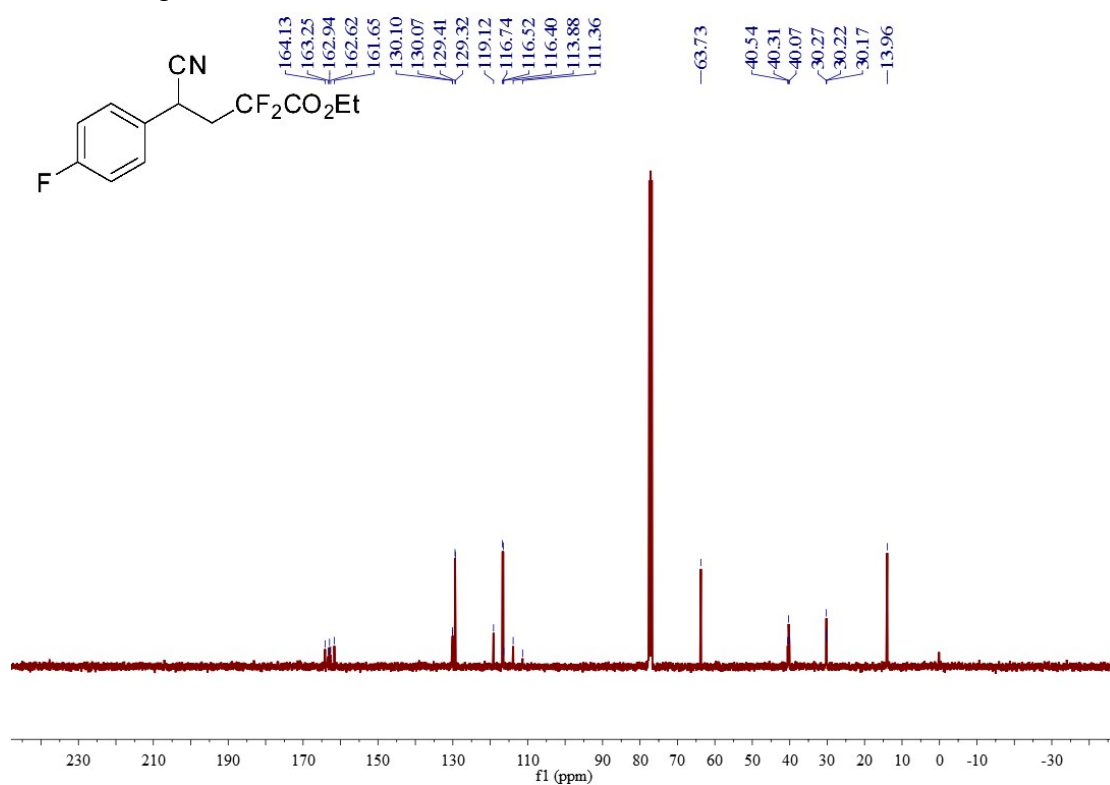

### <sup>1</sup>H NMR Spectrum of **4j**

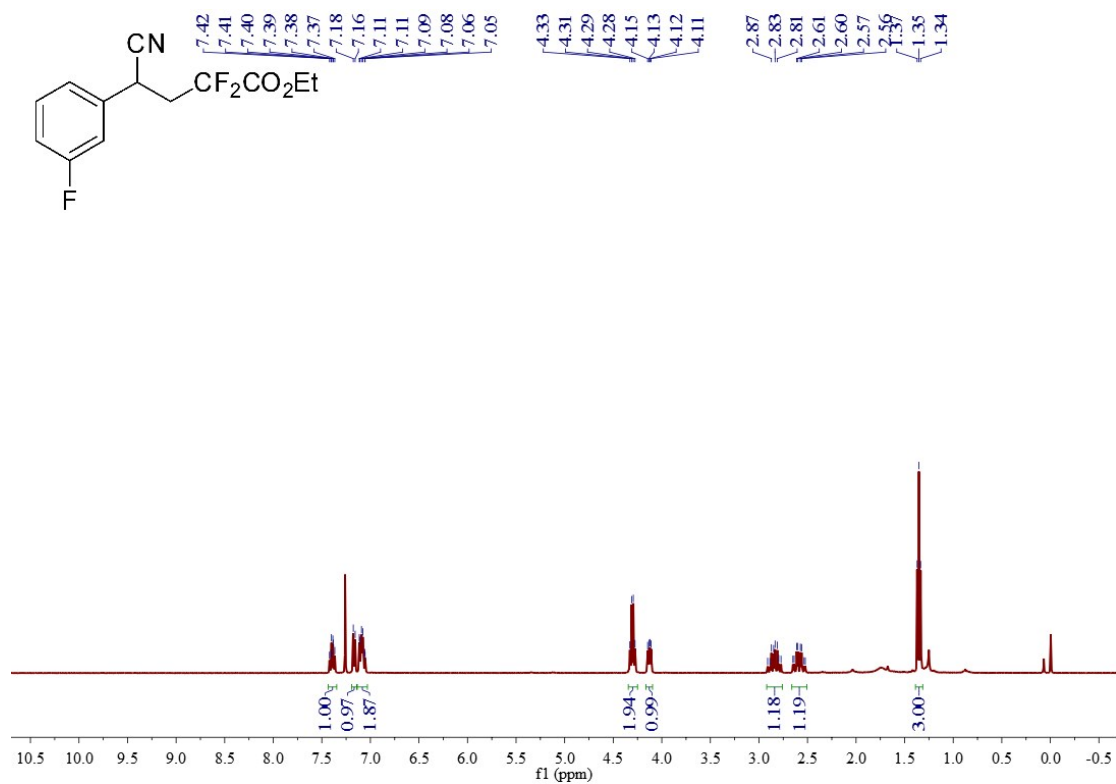

### <sup>19</sup>F NMR Spectrum of **4j**

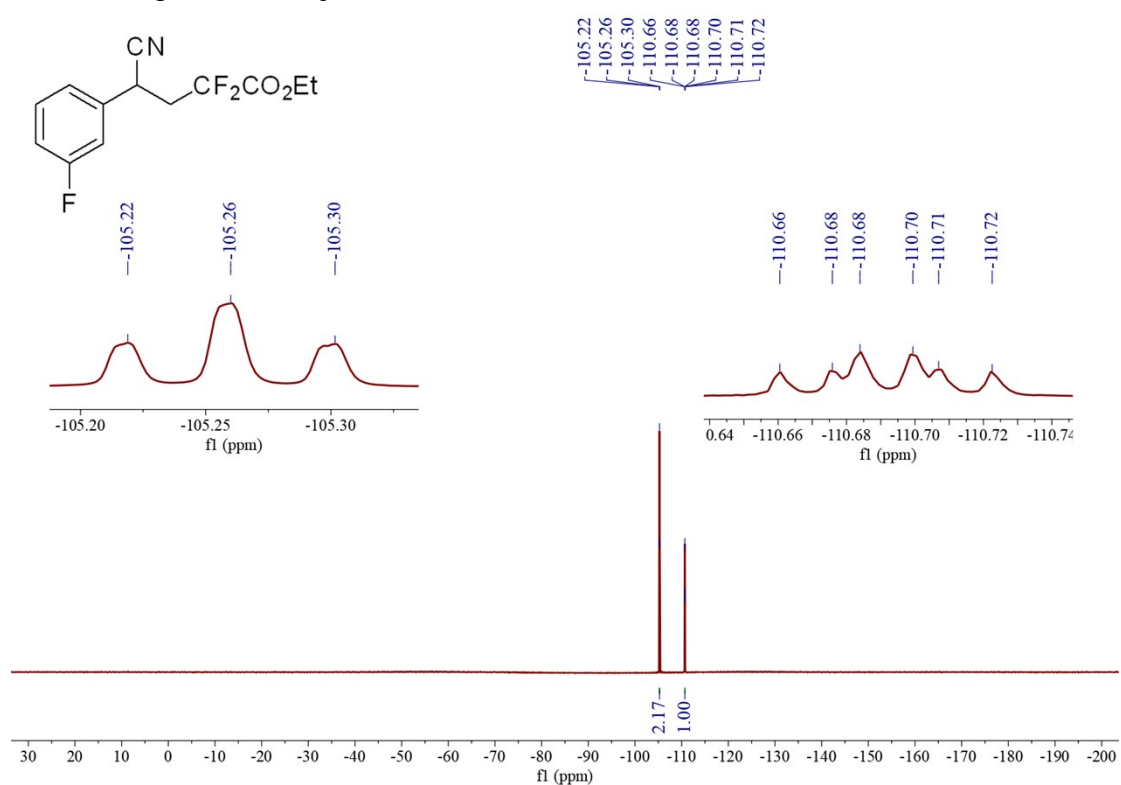

### <sup>13</sup>C NMR Spectrum of **4j**

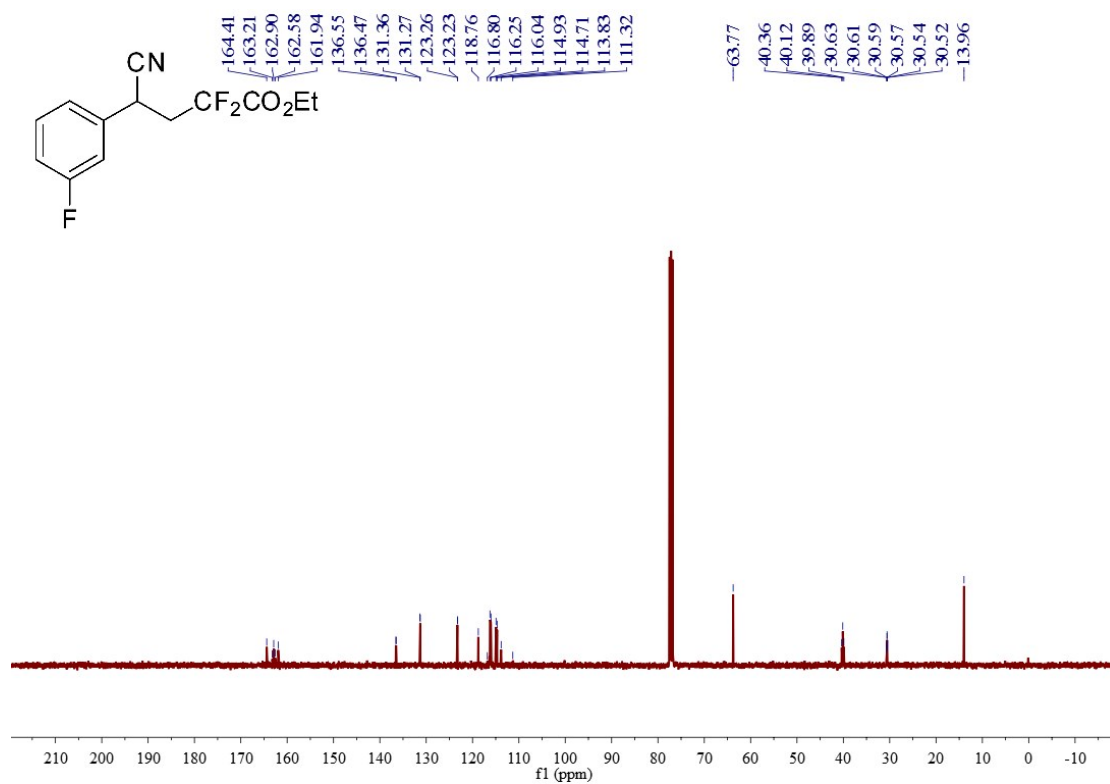

### <sup>1</sup>H NMR Spectrum of 4k

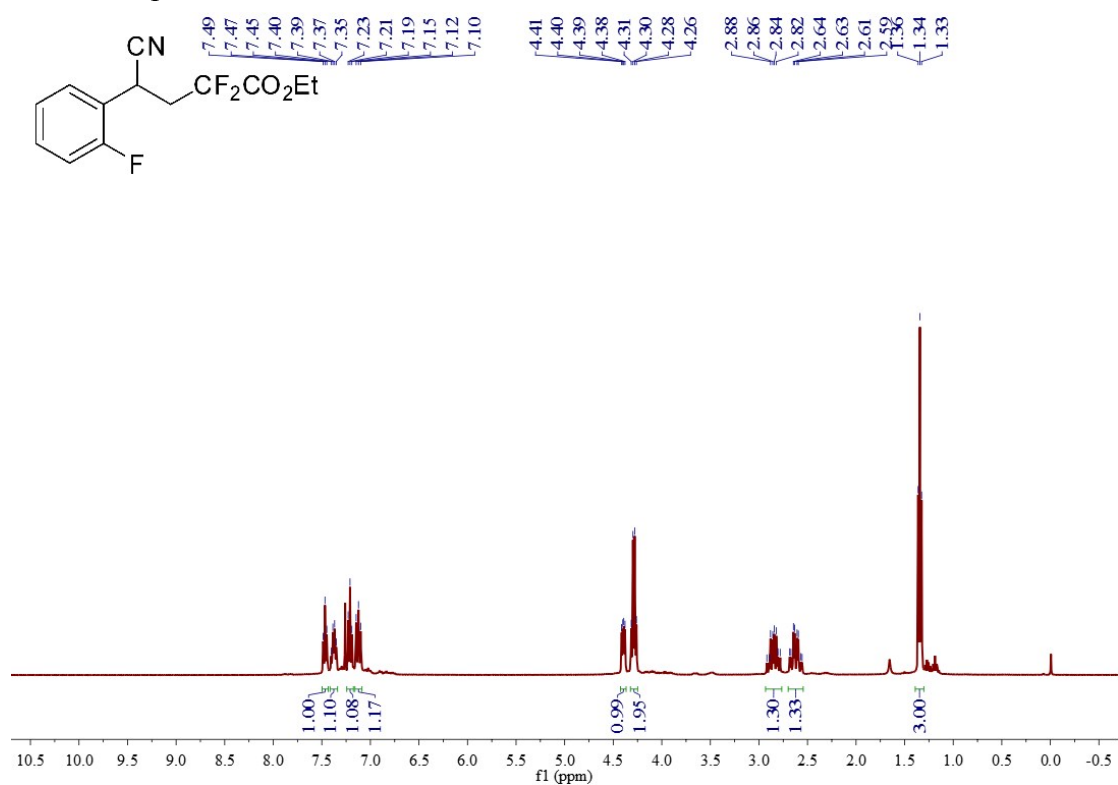

### <sup>19</sup>F NMR Spectrum of 4k

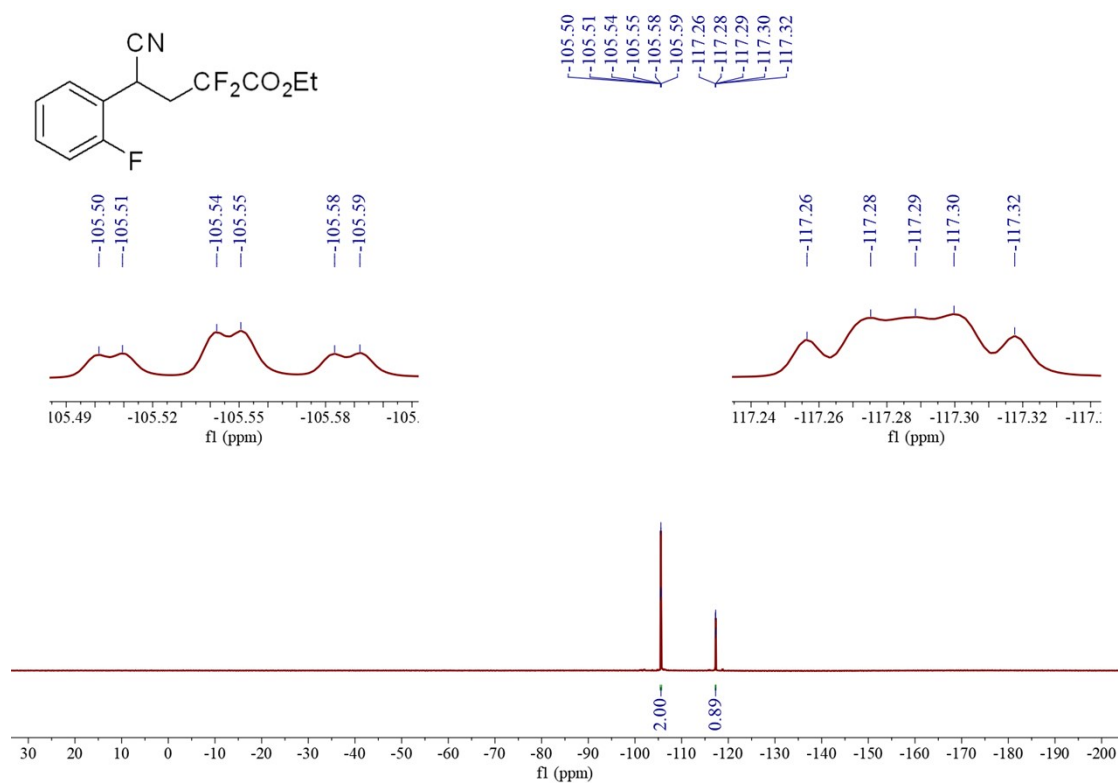



### <sup>13</sup>C NMR Spectrum of **4k**

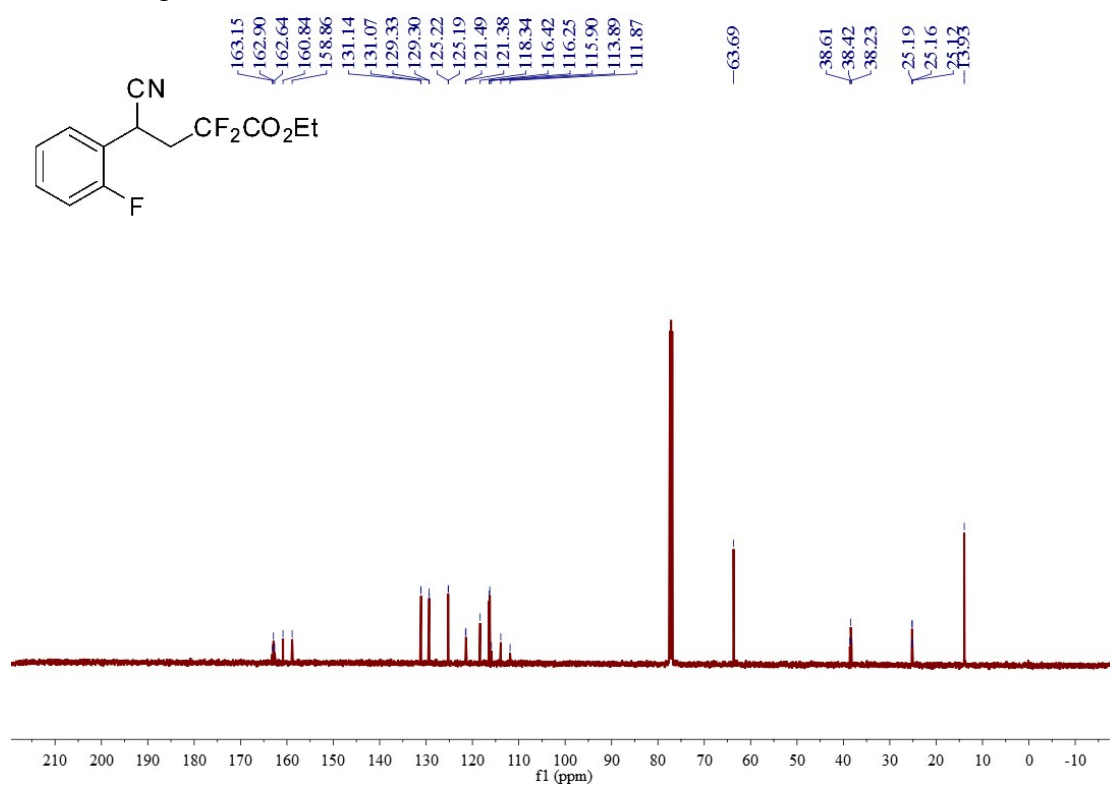

### <sup>1</sup>H NMR Spectrum of **4l**

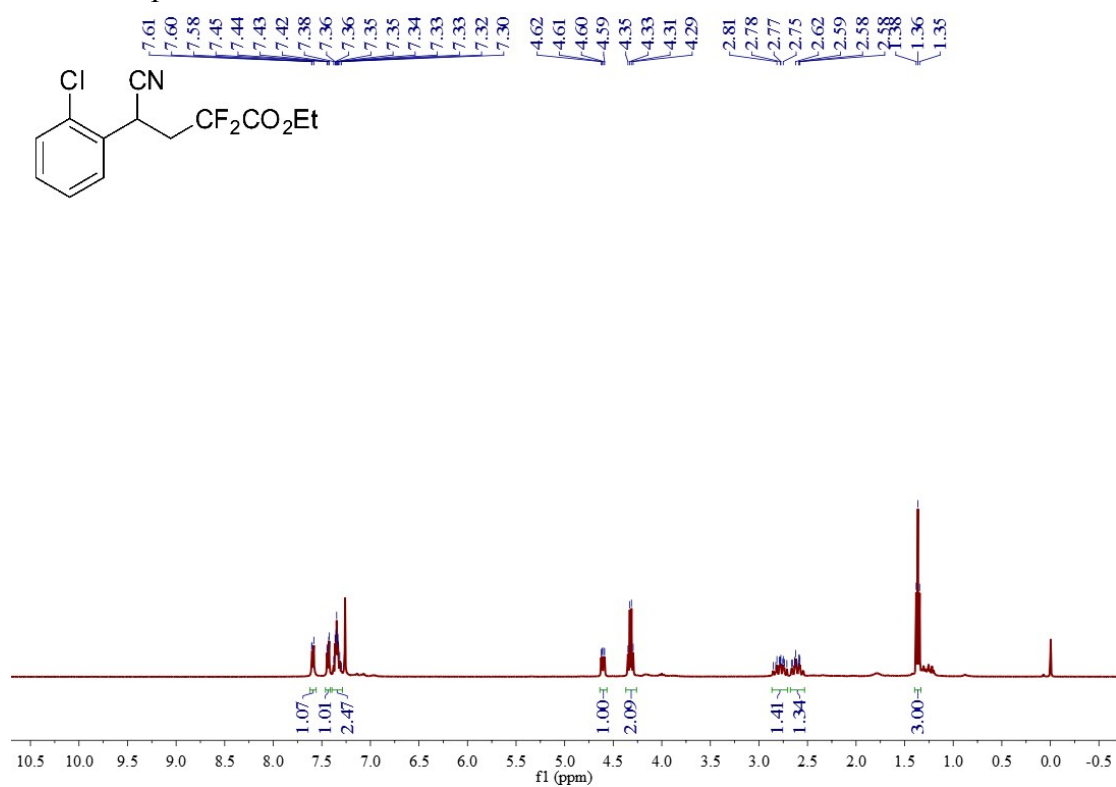

### <sup>19</sup>F NMR Spectrum of **41**

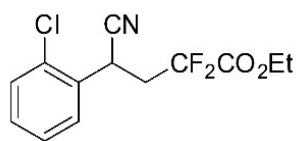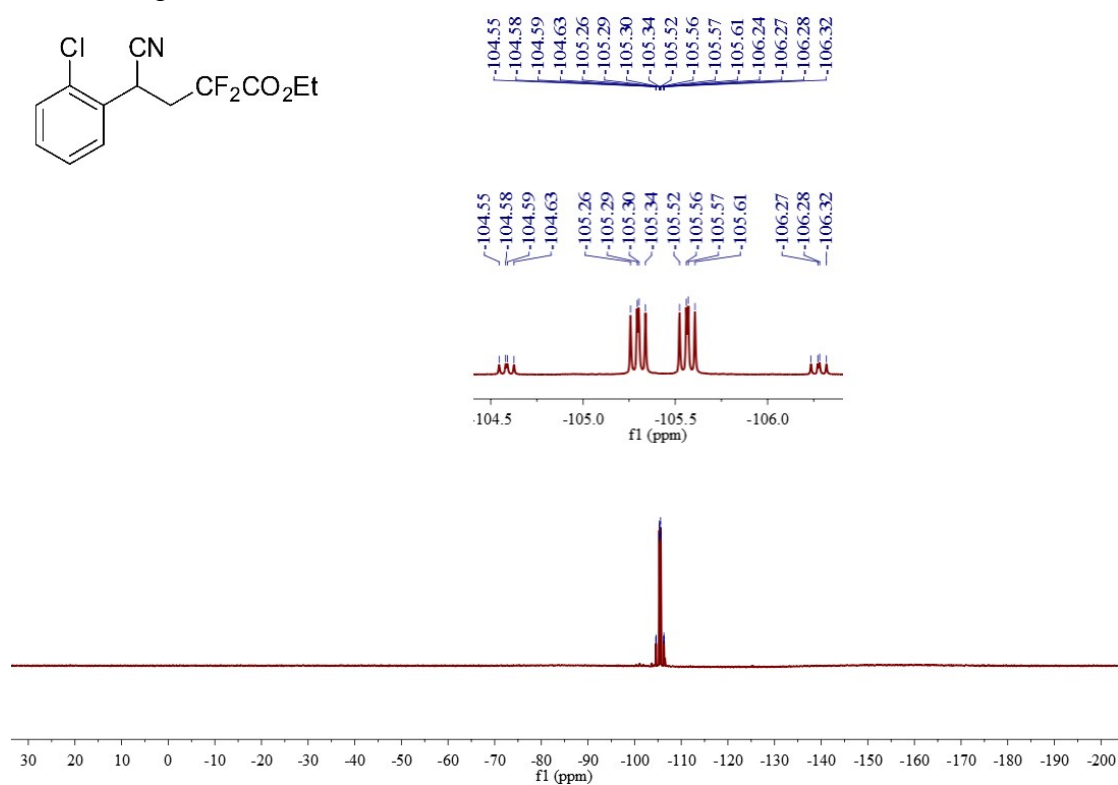

### <sup>13</sup>C NMR Spectrum of **41**

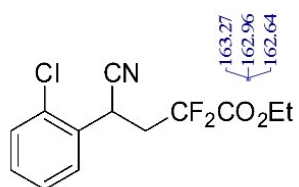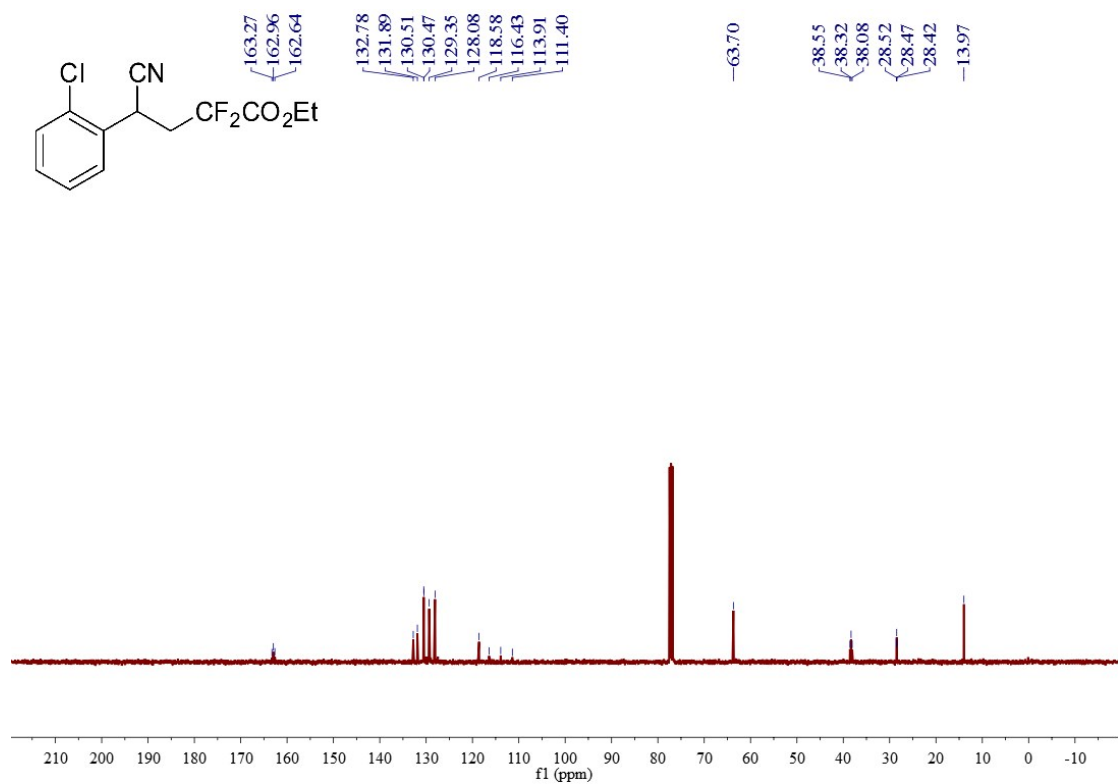

### <sup>1</sup>H NMR Spectrum of 4m

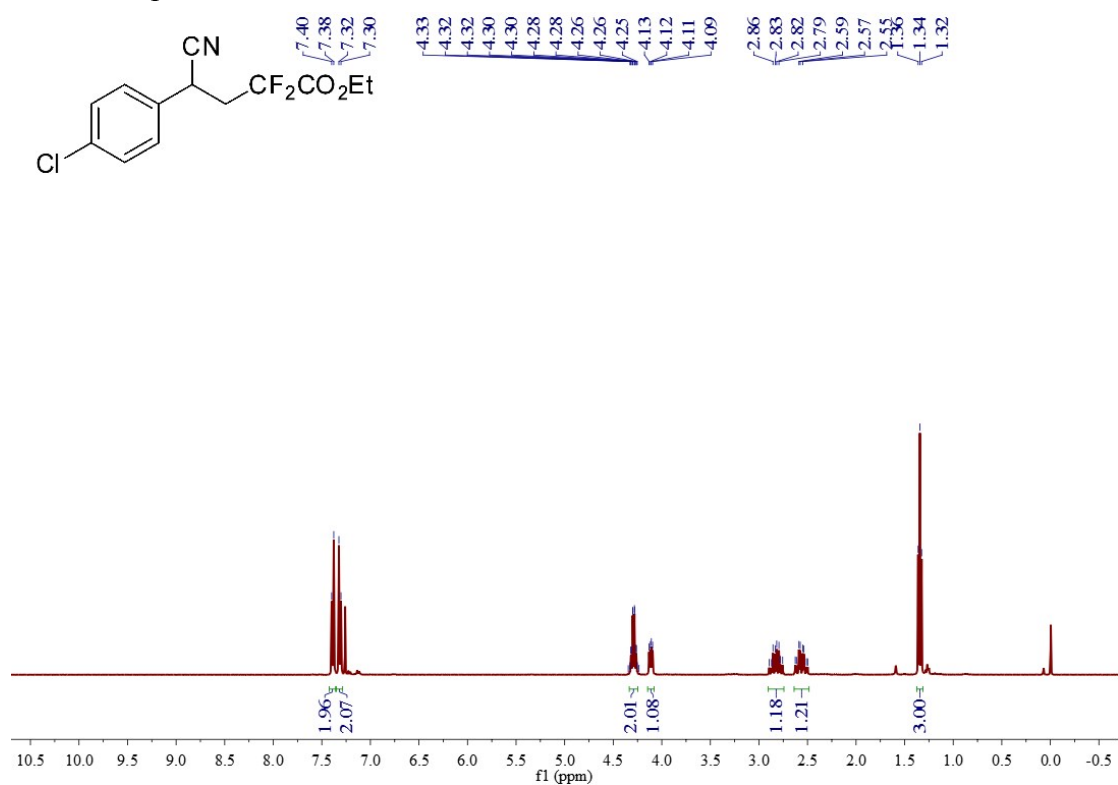

### <sup>19</sup>F NMR Spectrum of 4m

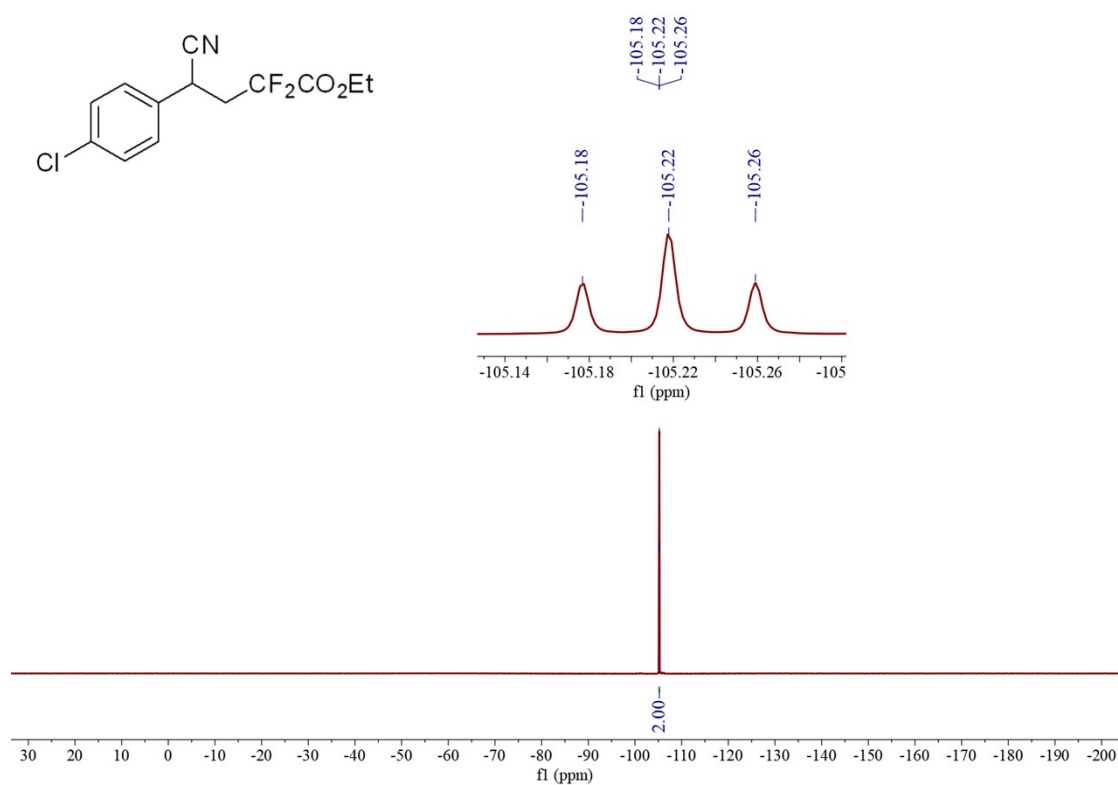

### <sup>13</sup>C NMR Spectrum of **4m**

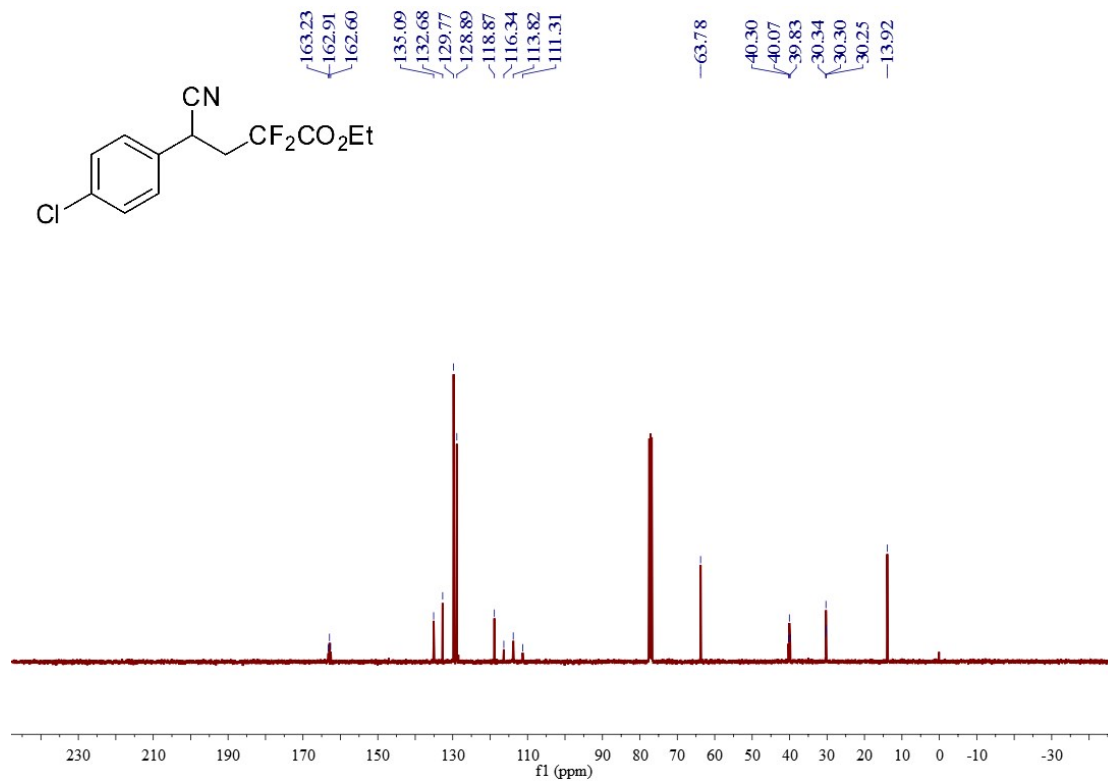

### <sup>1</sup>H NMR Spectrum of **4n**

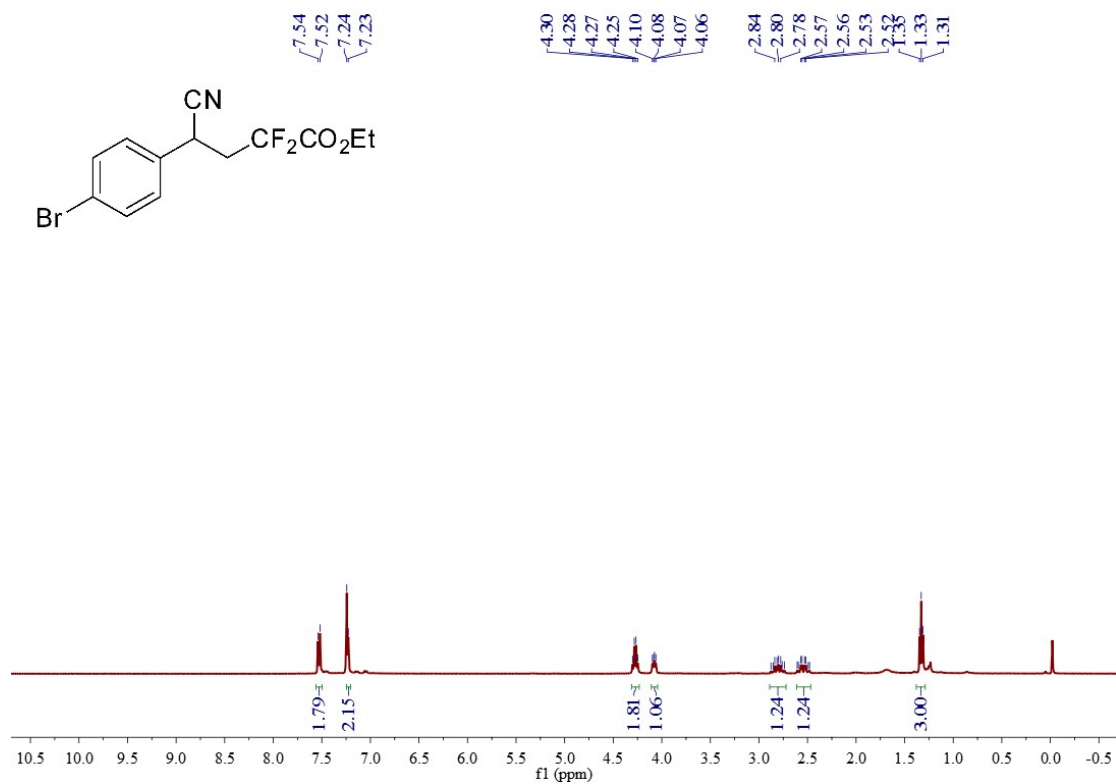

### <sup>19</sup>F NMR Spectrum of **4n**

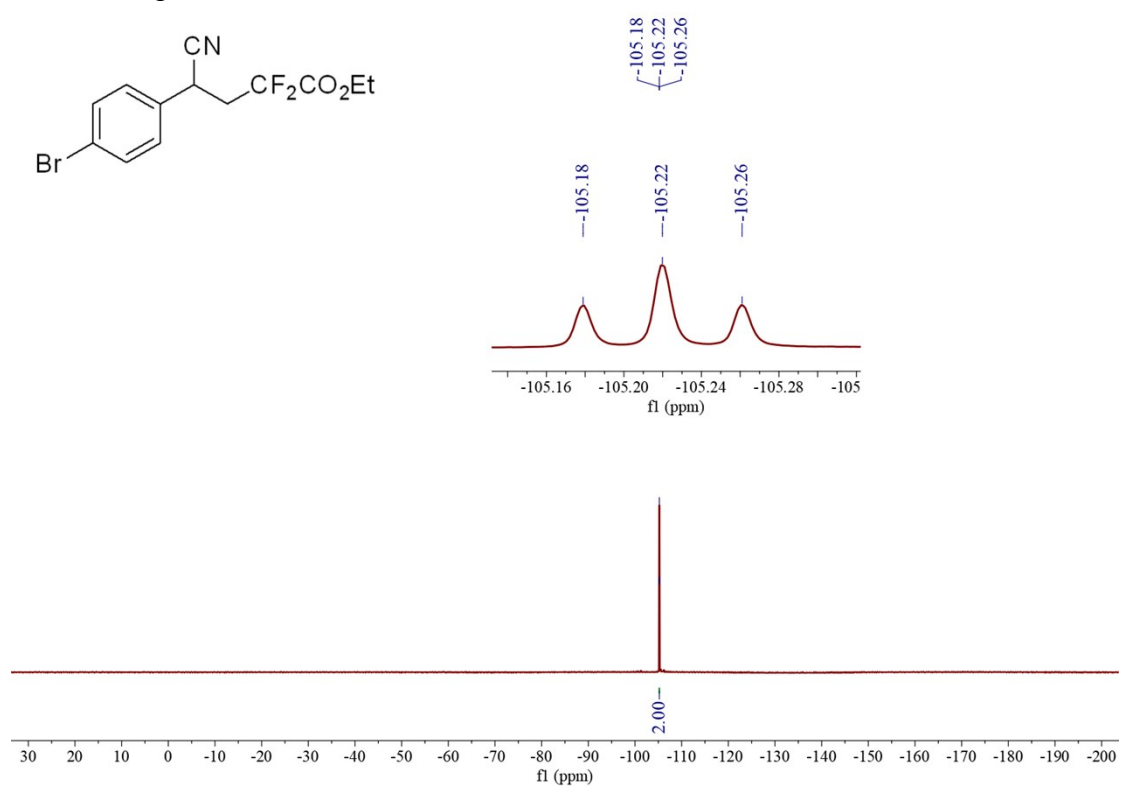

### <sup>13</sup>C NMR Spectrum of **4n**

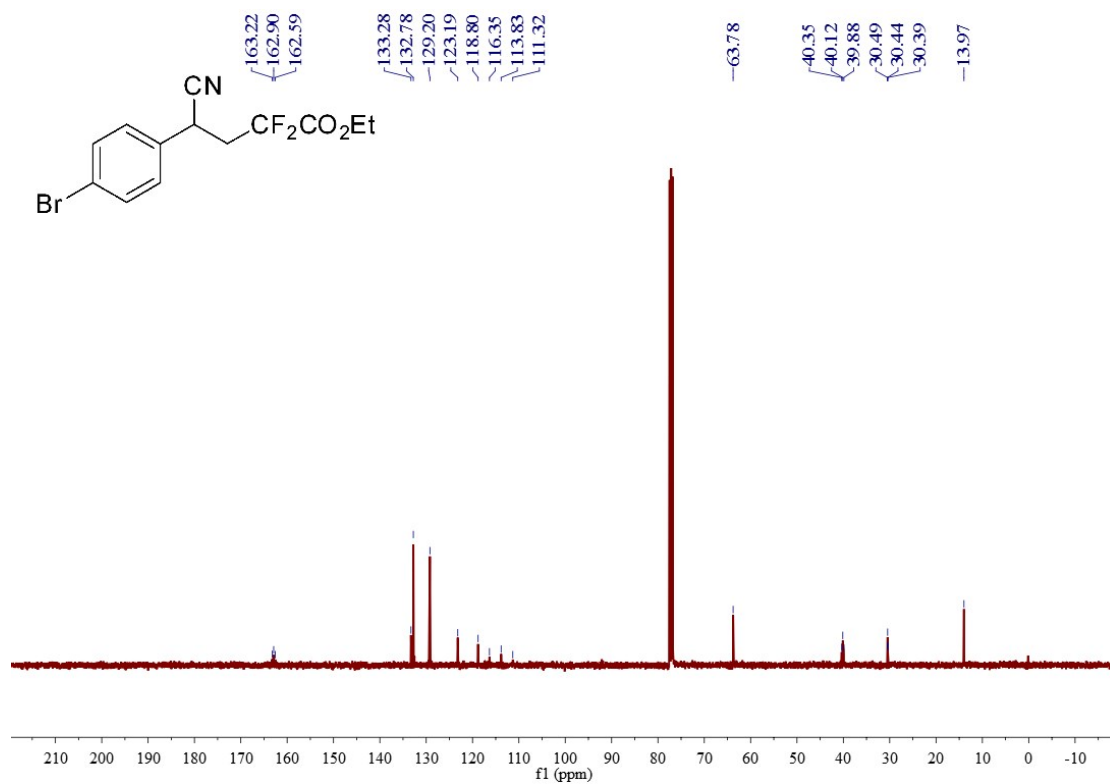

### <sup>1</sup>H NMR Spectrum of **4o**

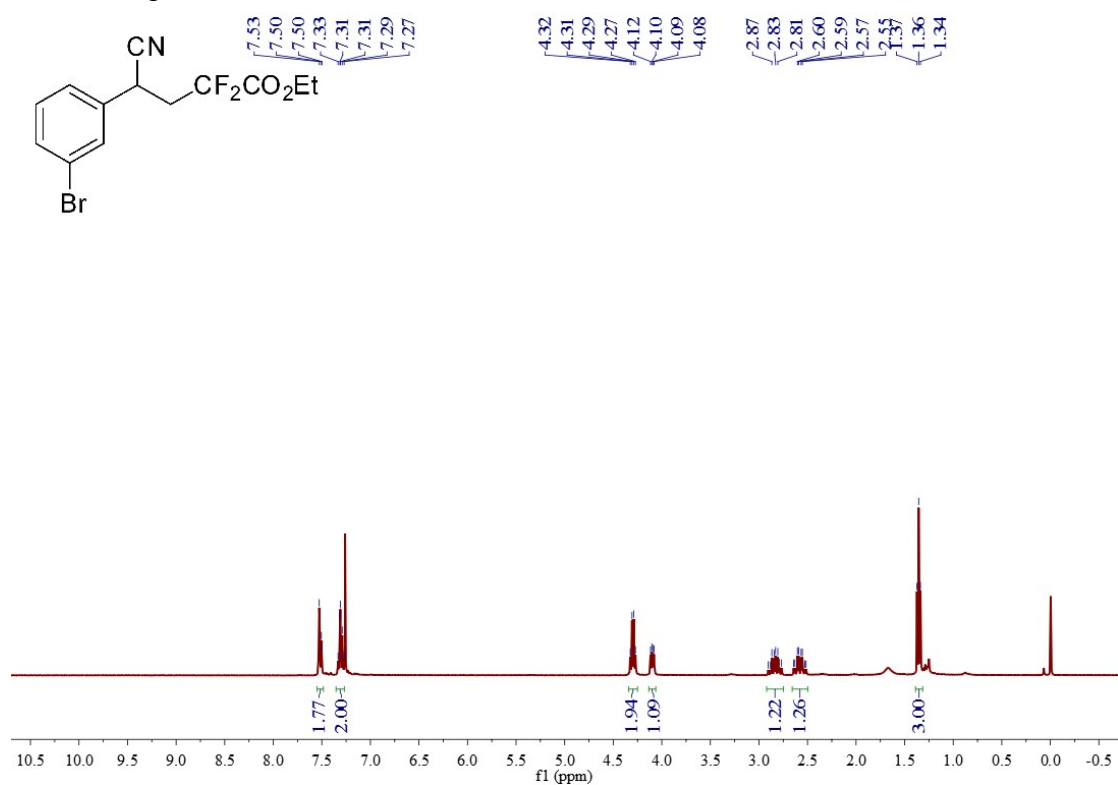

### <sup>19</sup>F NMR Spectrum of **4o**

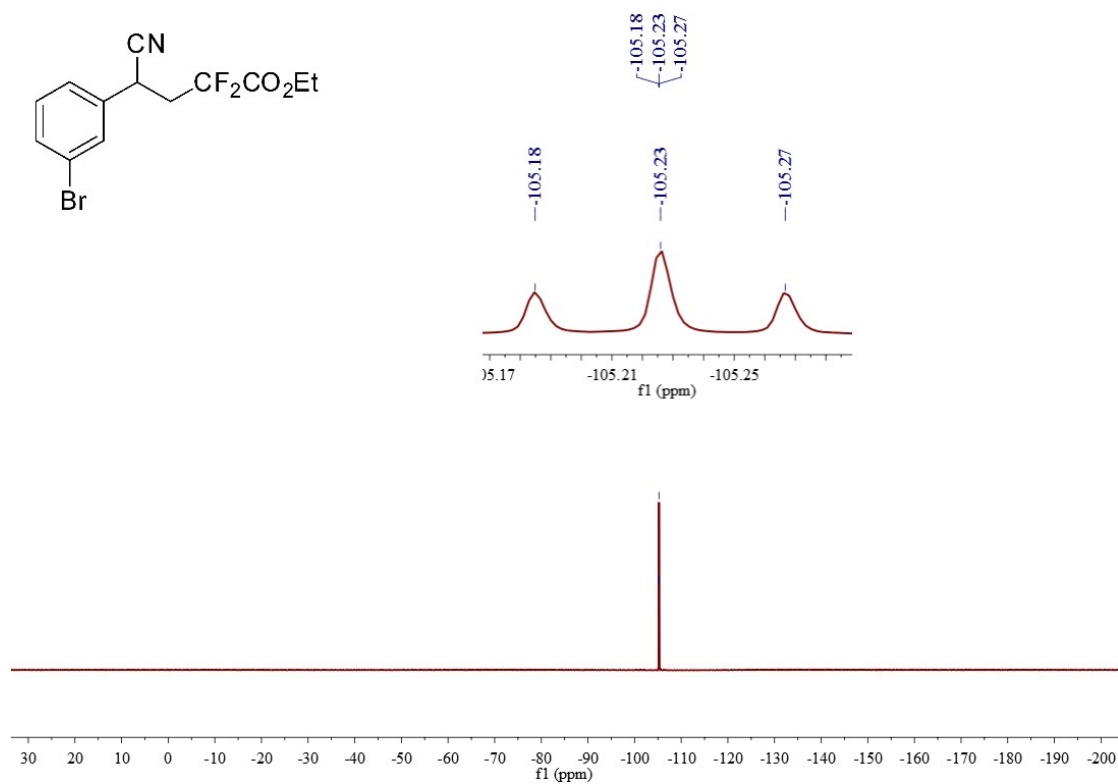

<sup>13</sup>C NMR Spectrum of **4o**

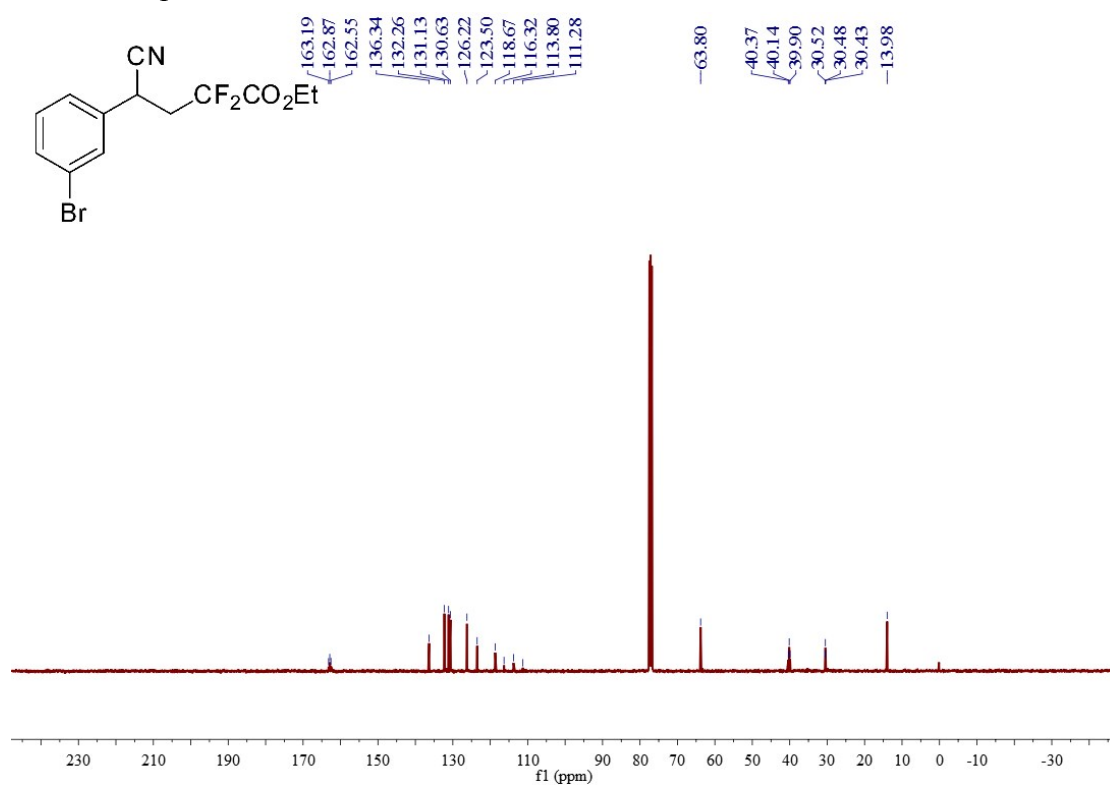

<sup>1</sup>H NMR Spectrum of **4p**

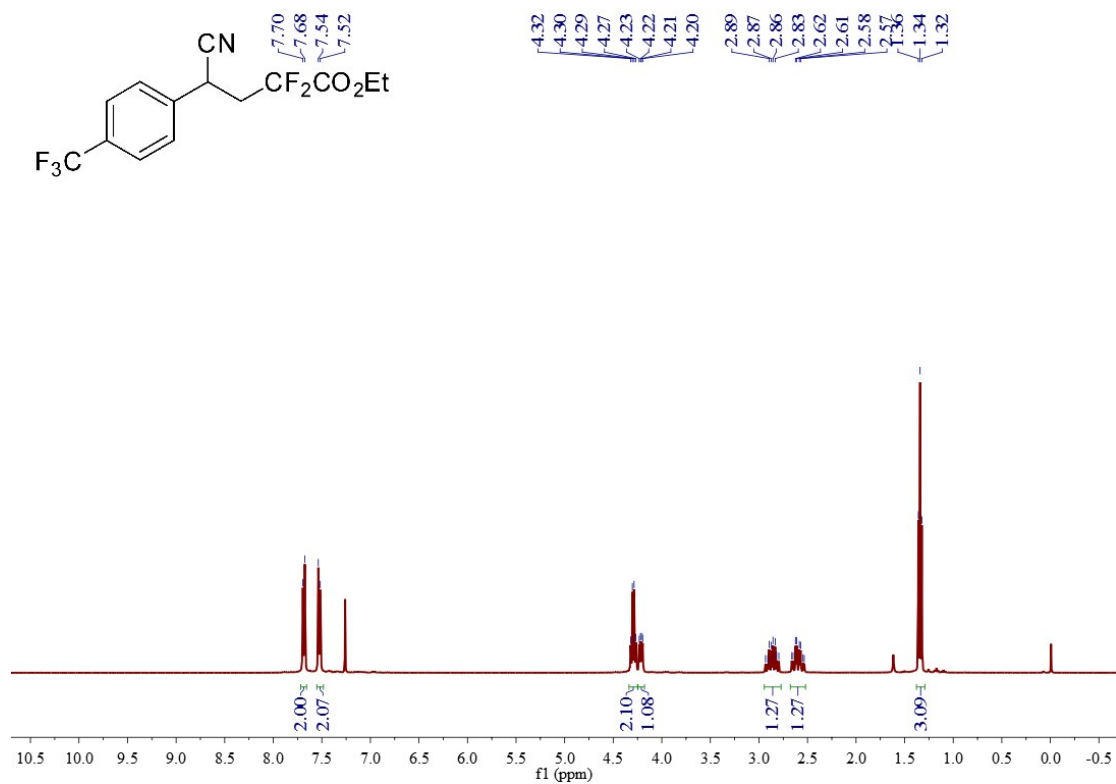

### <sup>19</sup>F NMR Spectrum of **4p**

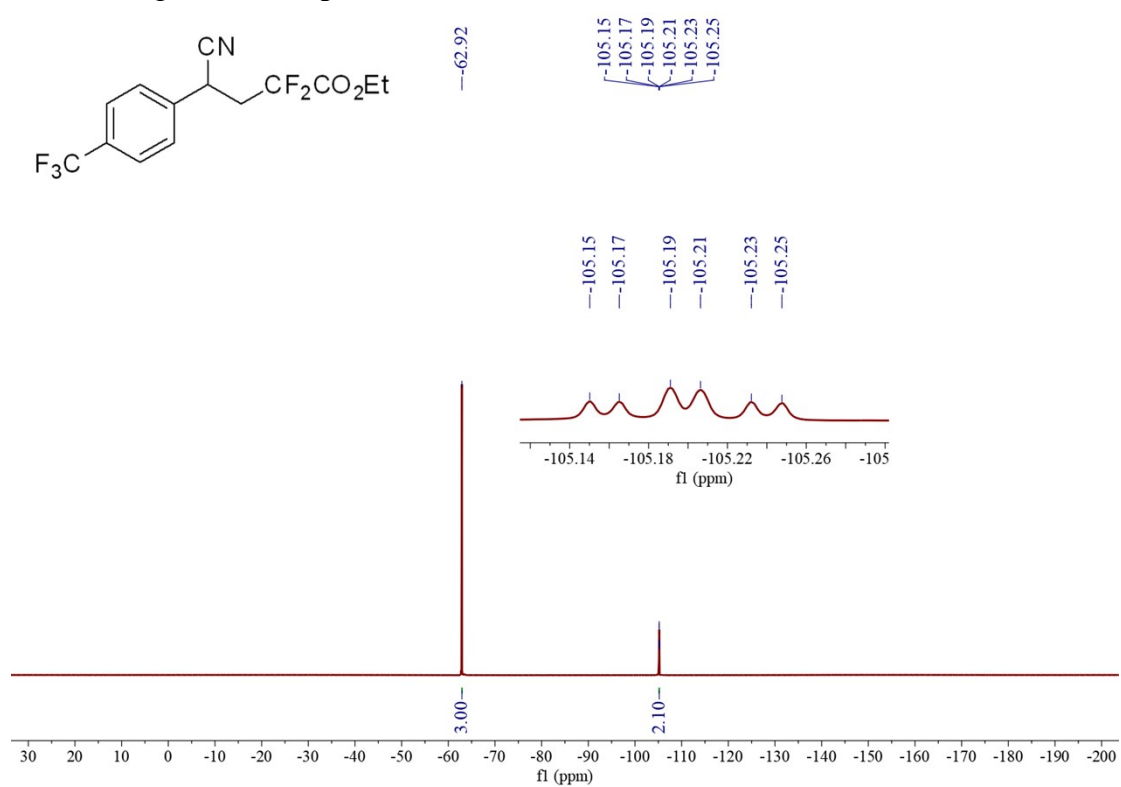

### <sup>13</sup>C NMR Spectrum of **4p**

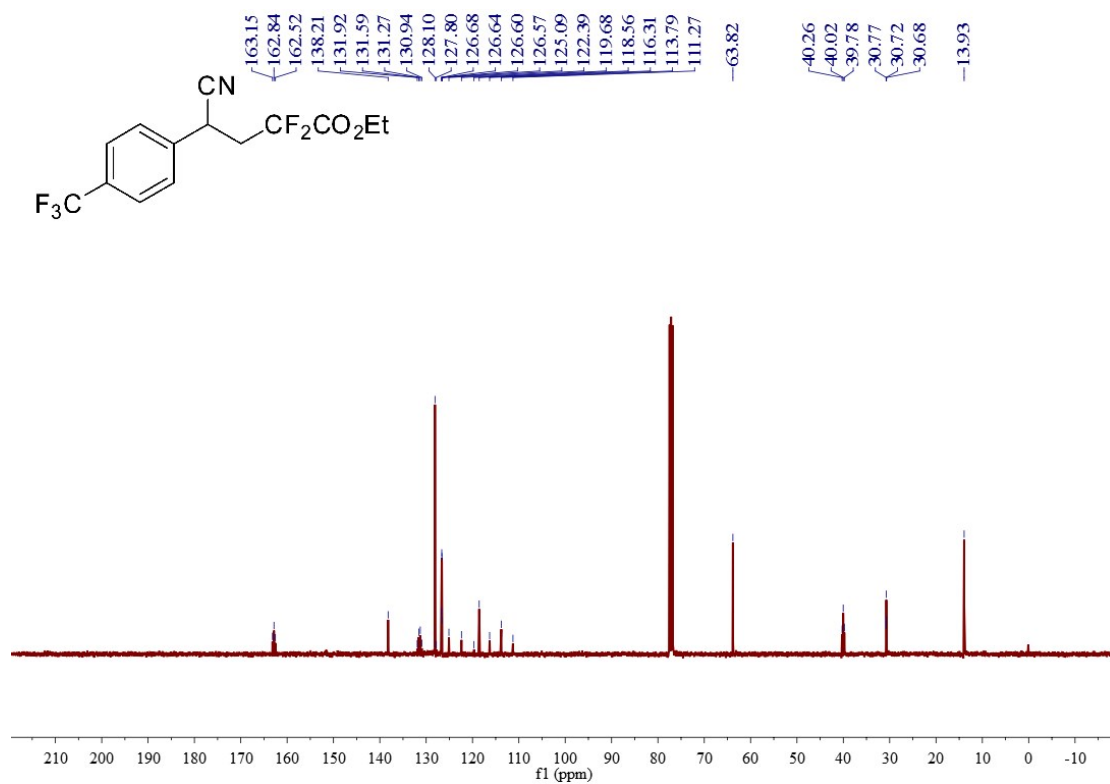



### <sup>1</sup>H NMR Spectrum of 4q

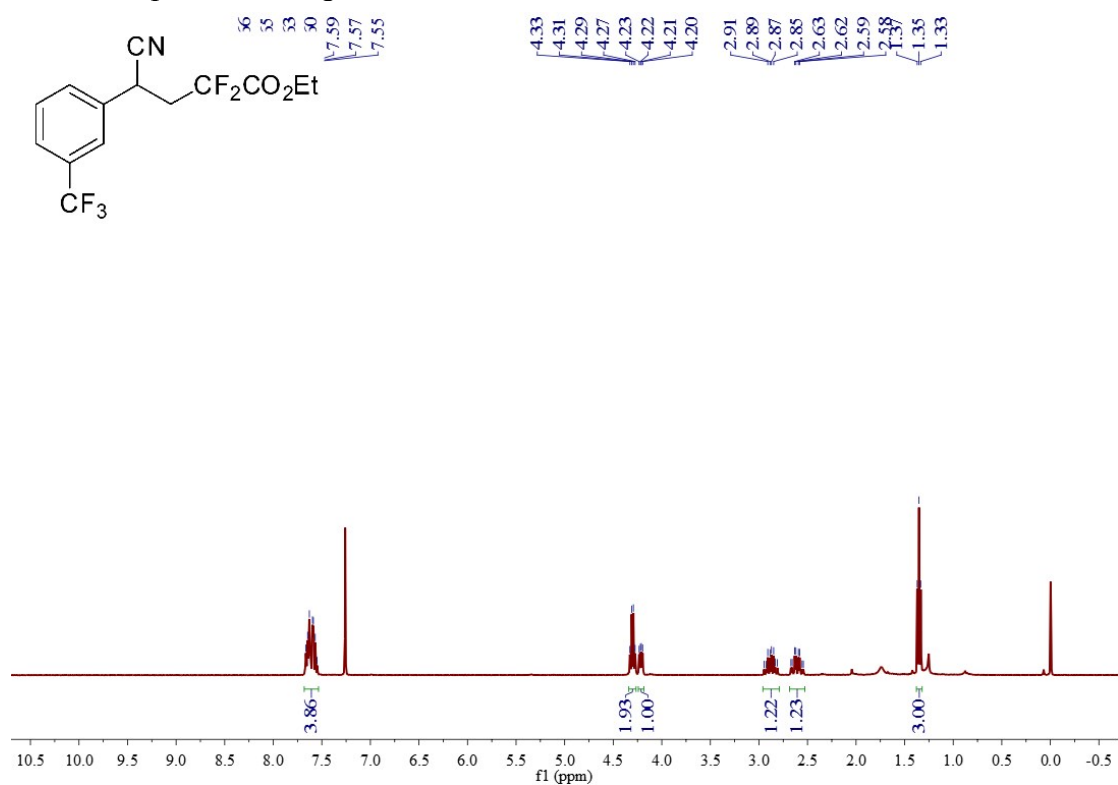

### <sup>19</sup>F NMR Spectrum of 4q

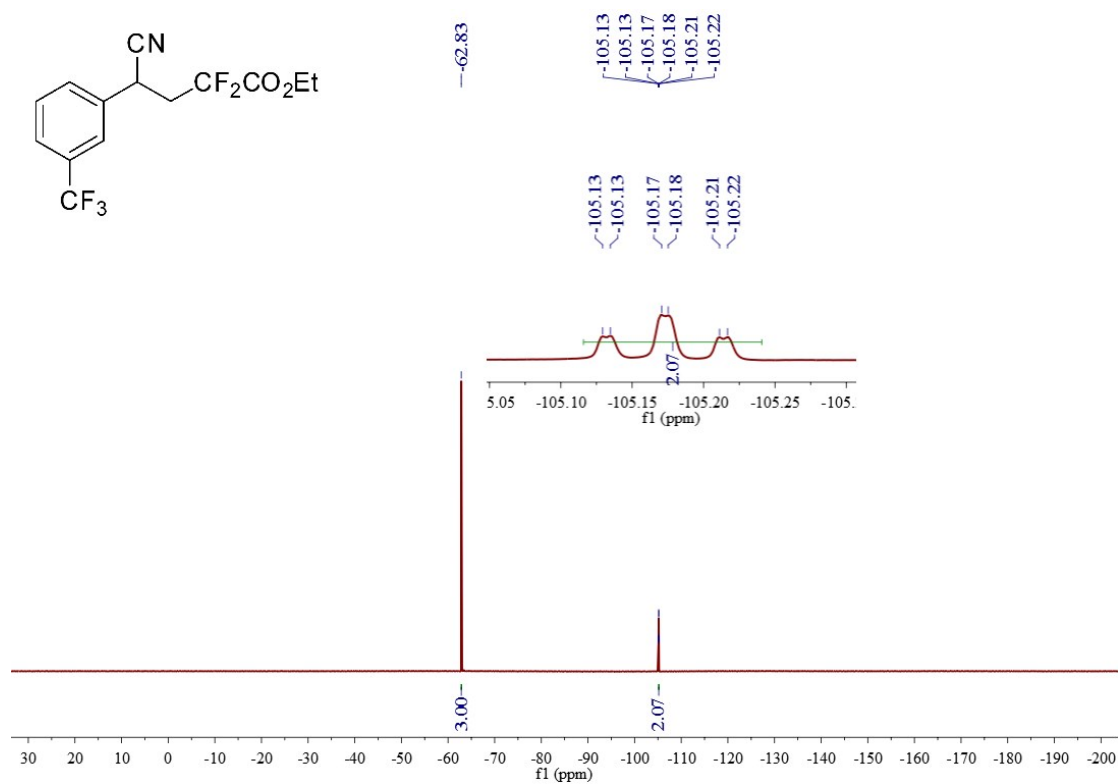

### <sup>13</sup>C NMR Spectrum of **4q**

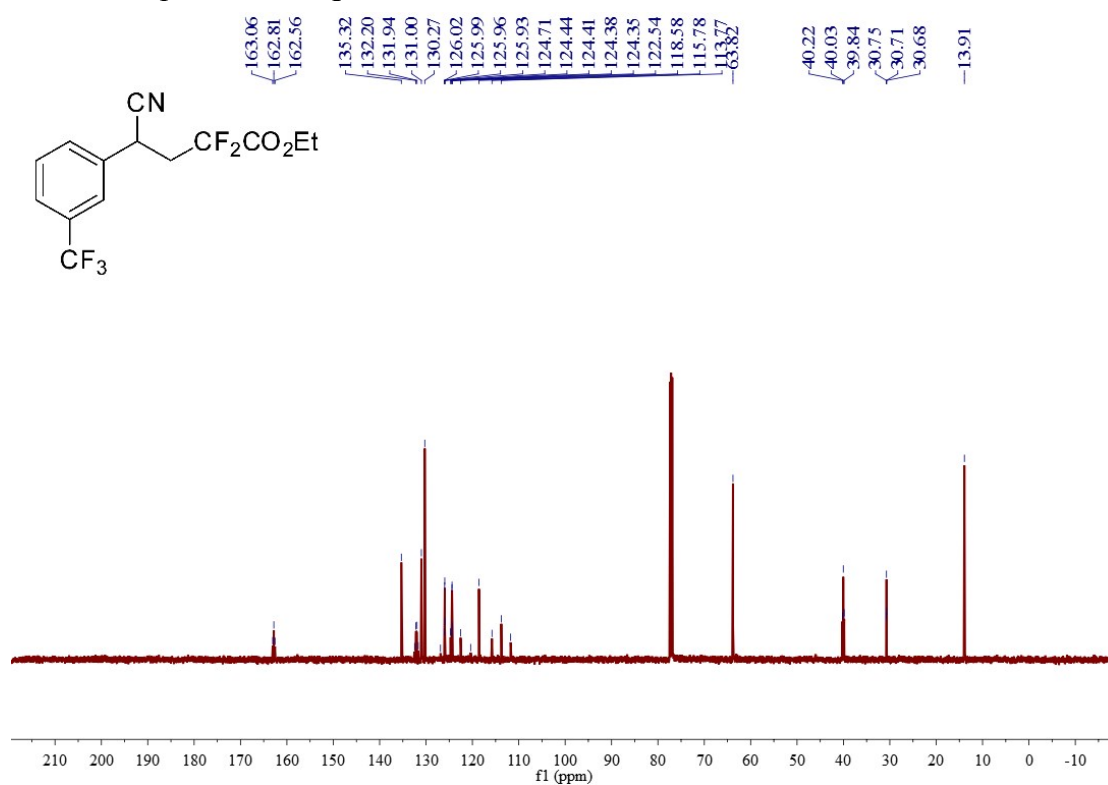

### <sup>1</sup>H NMR Spectrum of **4r**

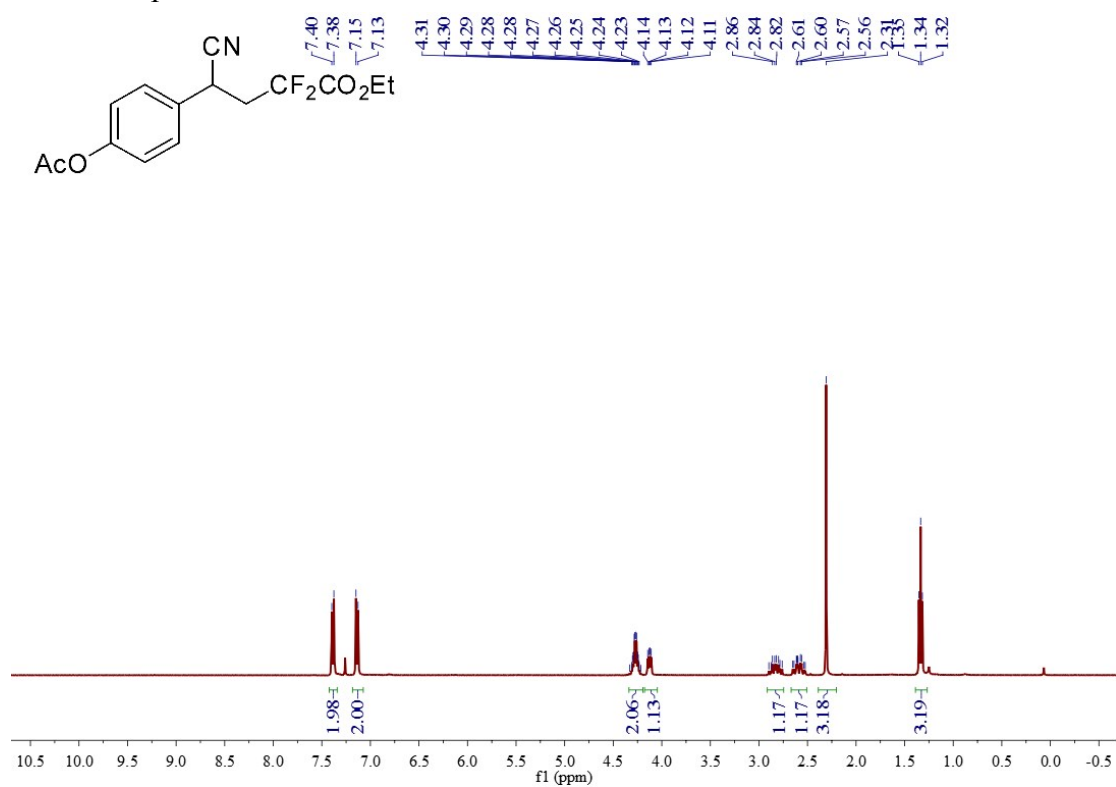

### <sup>19</sup>F NMR Spectrum of 4r

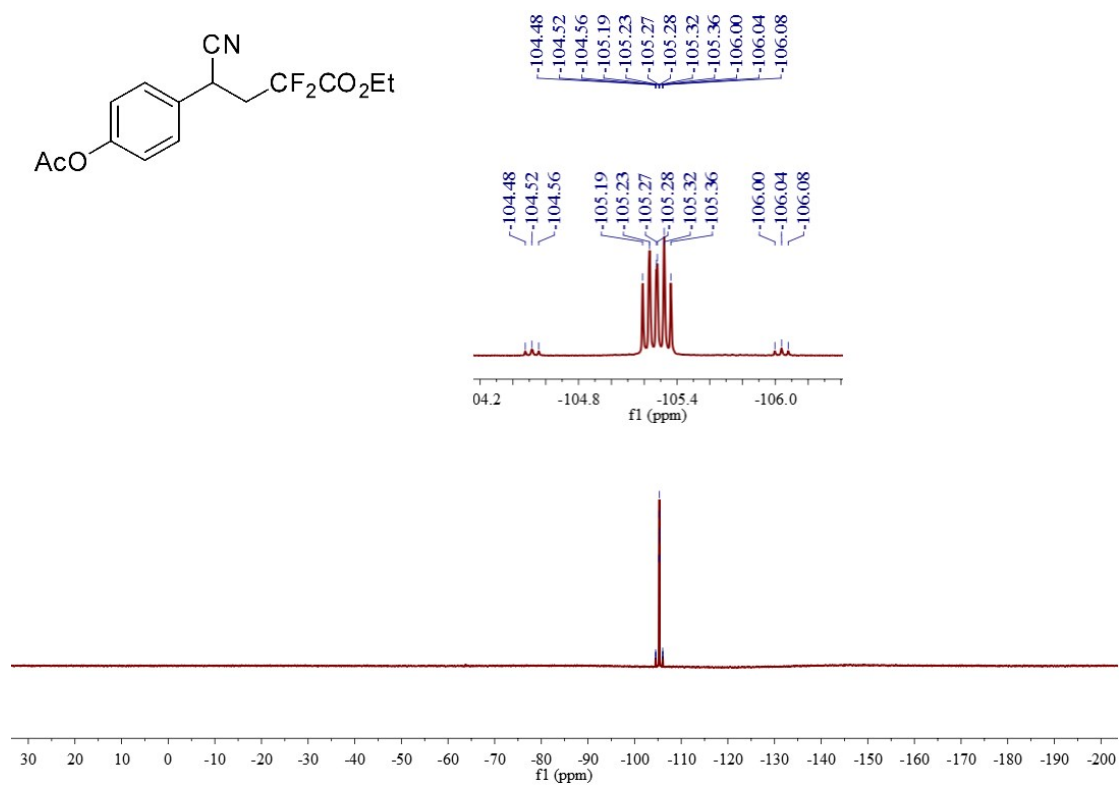

### <sup>13</sup>C NMR Spectrum of 4r

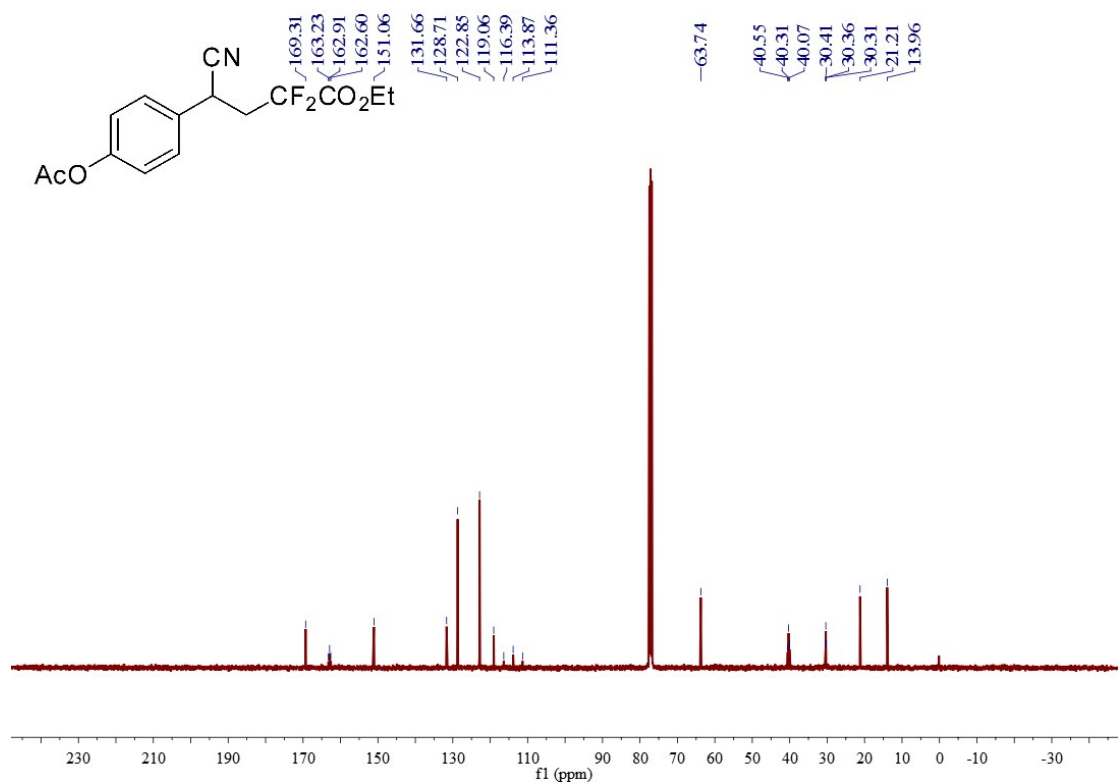

### <sup>1</sup>H NMR Spectrum of 4s

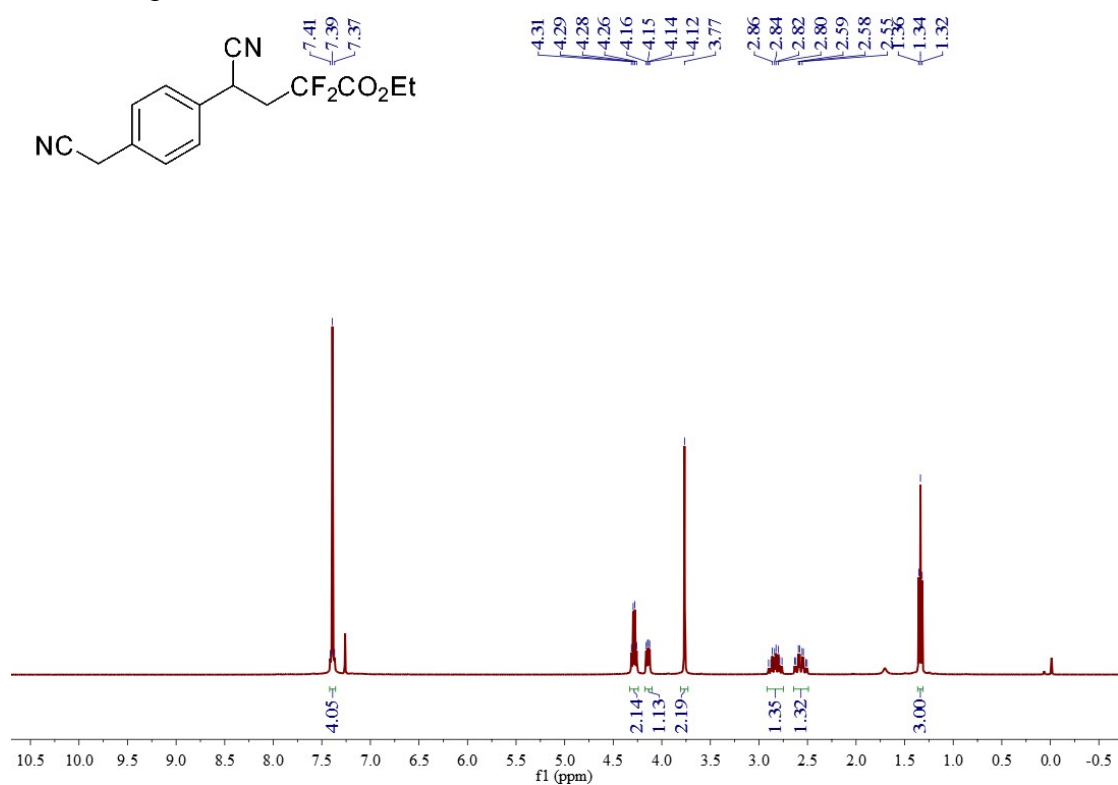

### <sup>19</sup>F NMR Spectrum of 4s

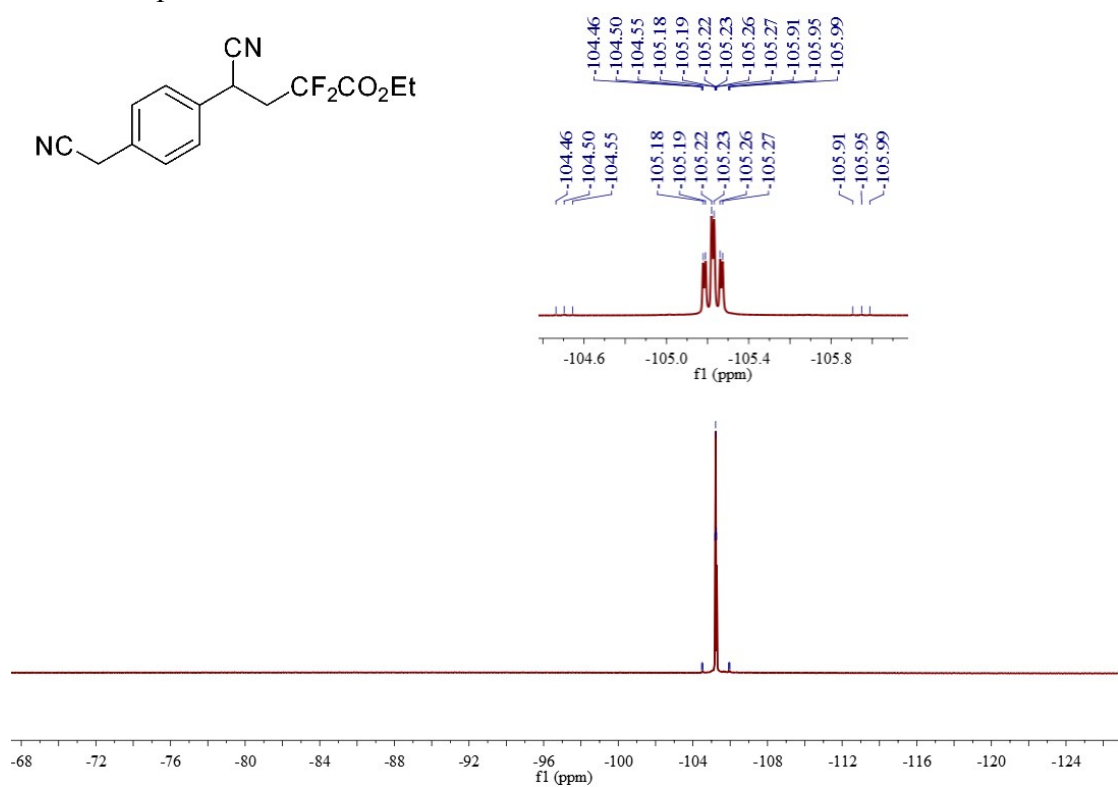

### <sup>13</sup>C NMR Spectrum of 4s

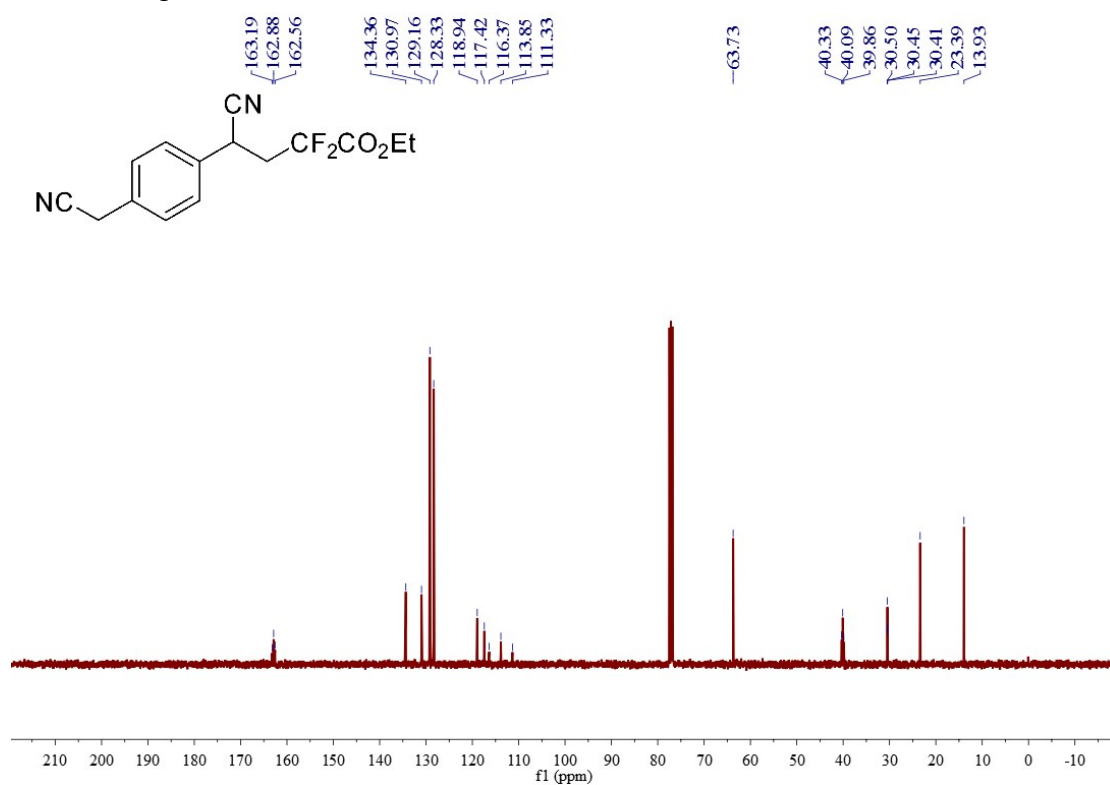

### <sup>1</sup>H NMR Spectrum of 4t

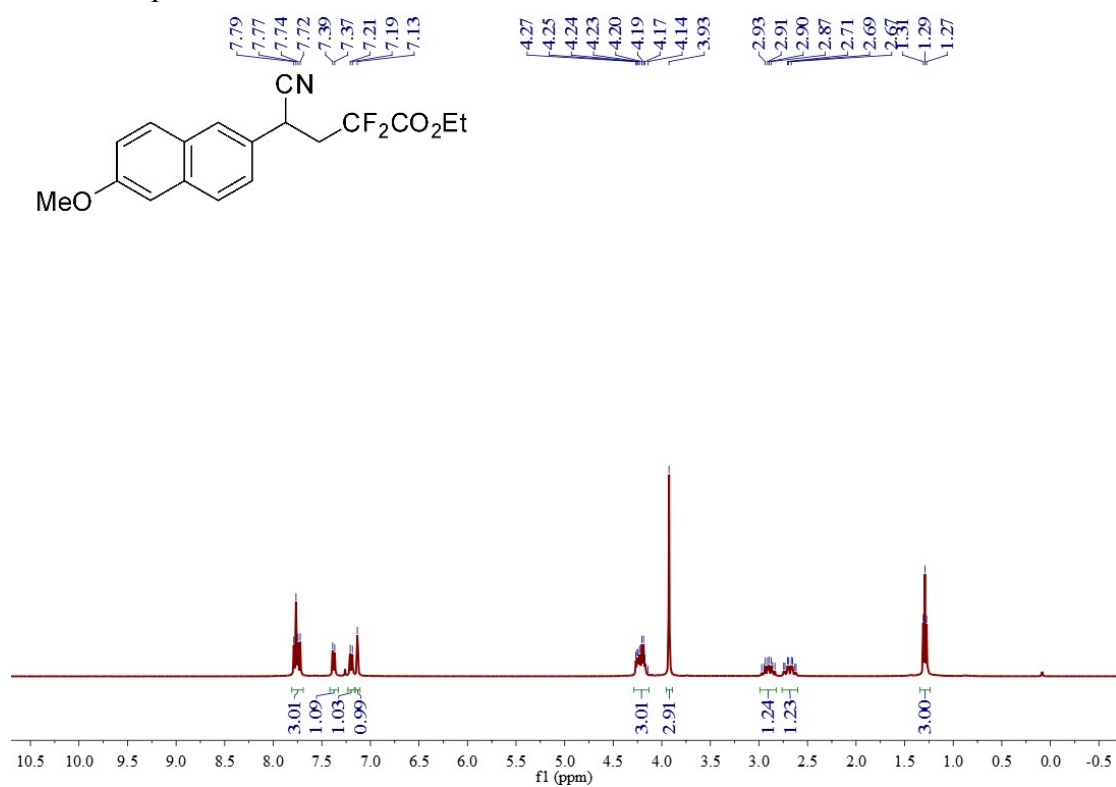

### <sup>19</sup>F NMR Spectrum of 4t

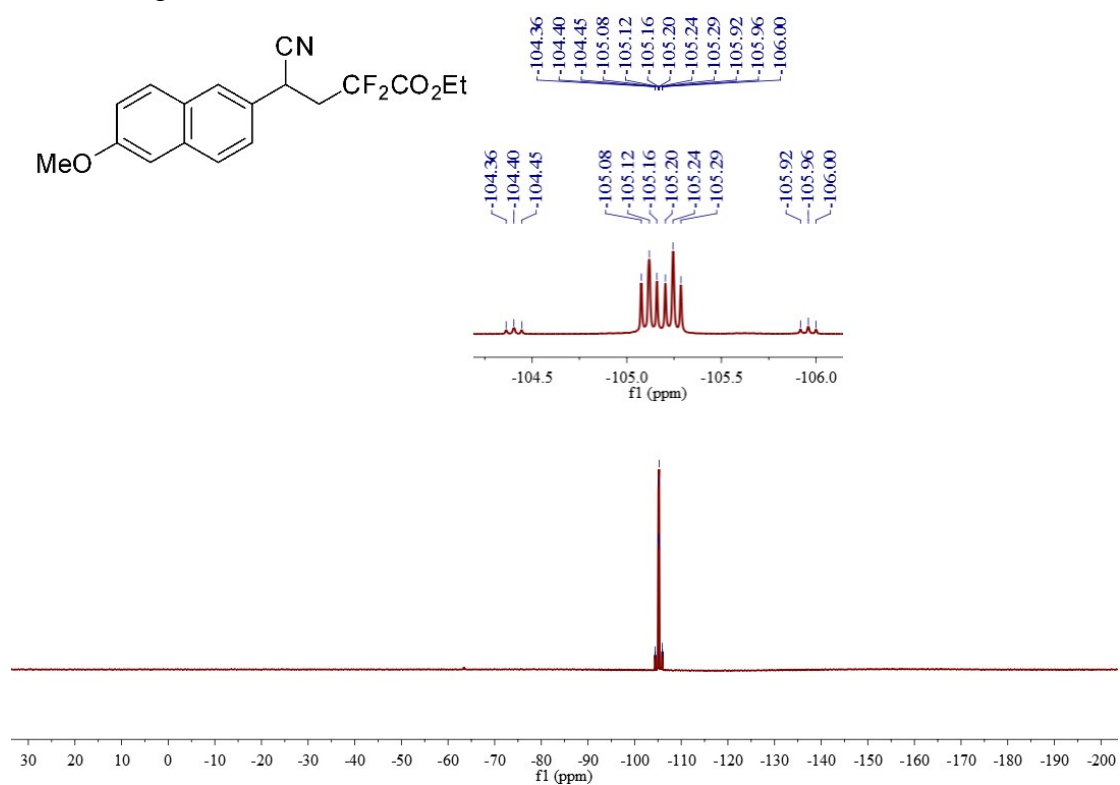

### <sup>13</sup>C NMR Spectrum of 4t

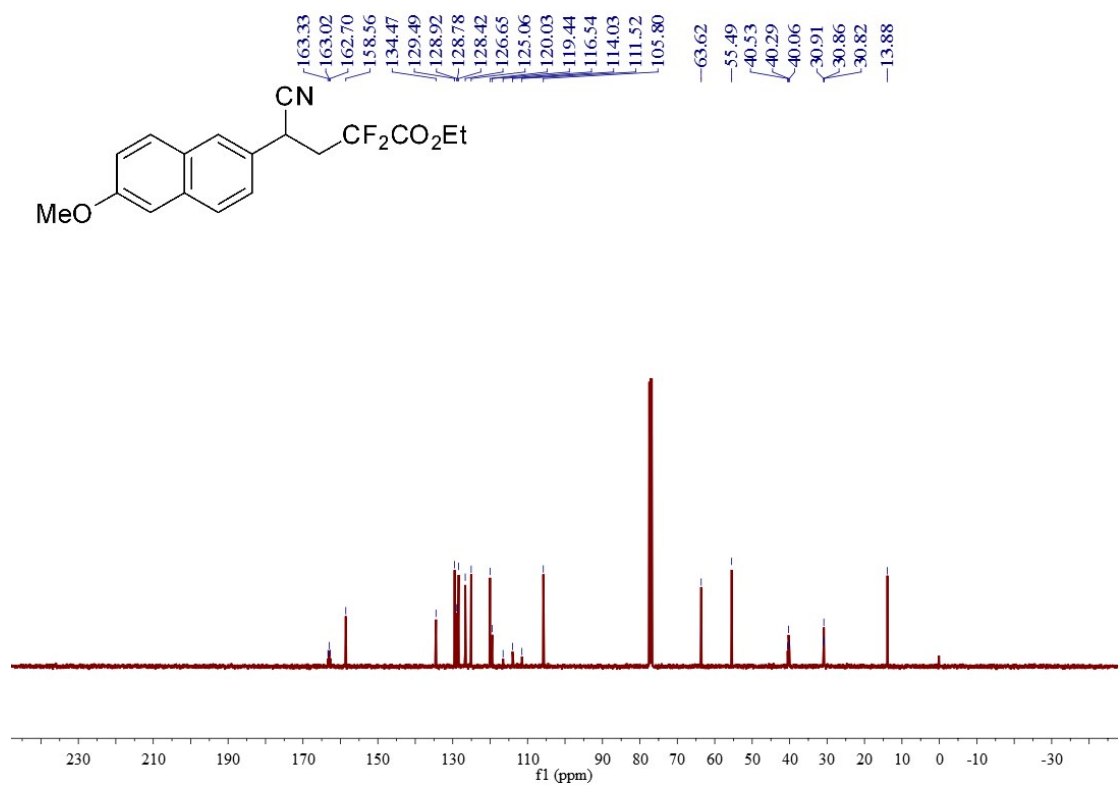

### <sup>1</sup>H NMR Spectrum of **4u**

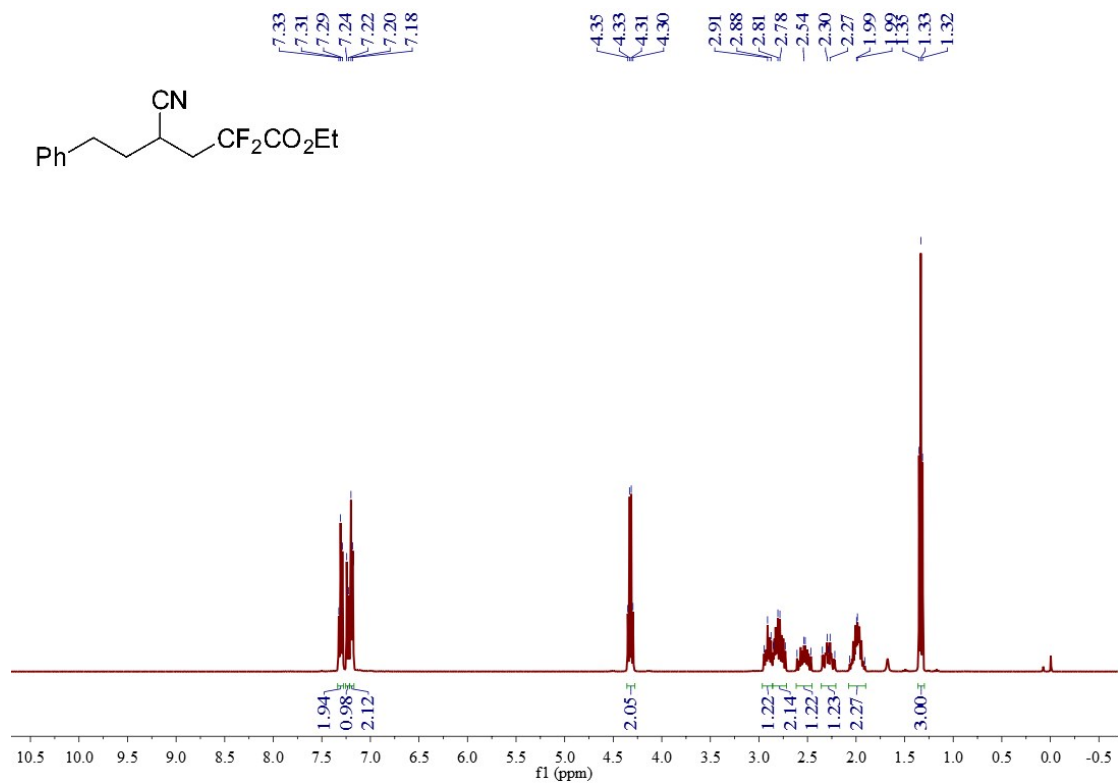

### <sup>19</sup>F NMR Spectrum of **4u**

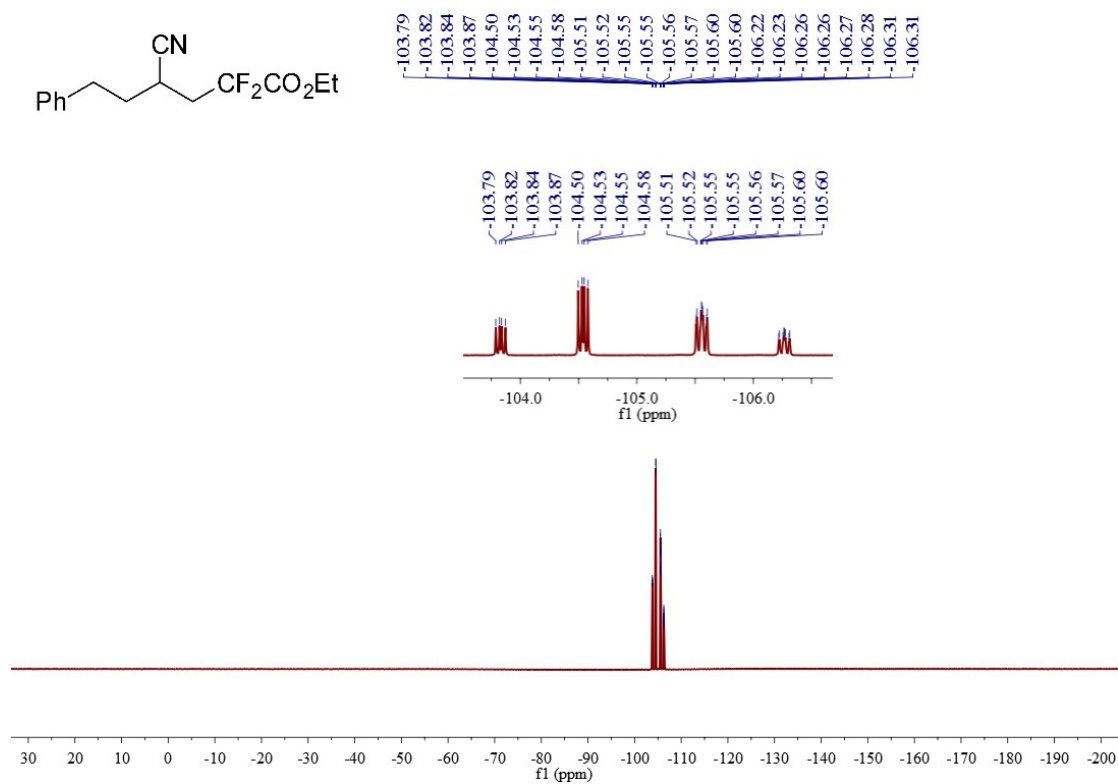

### <sup>13</sup>C NMR Spectrum of **4u**

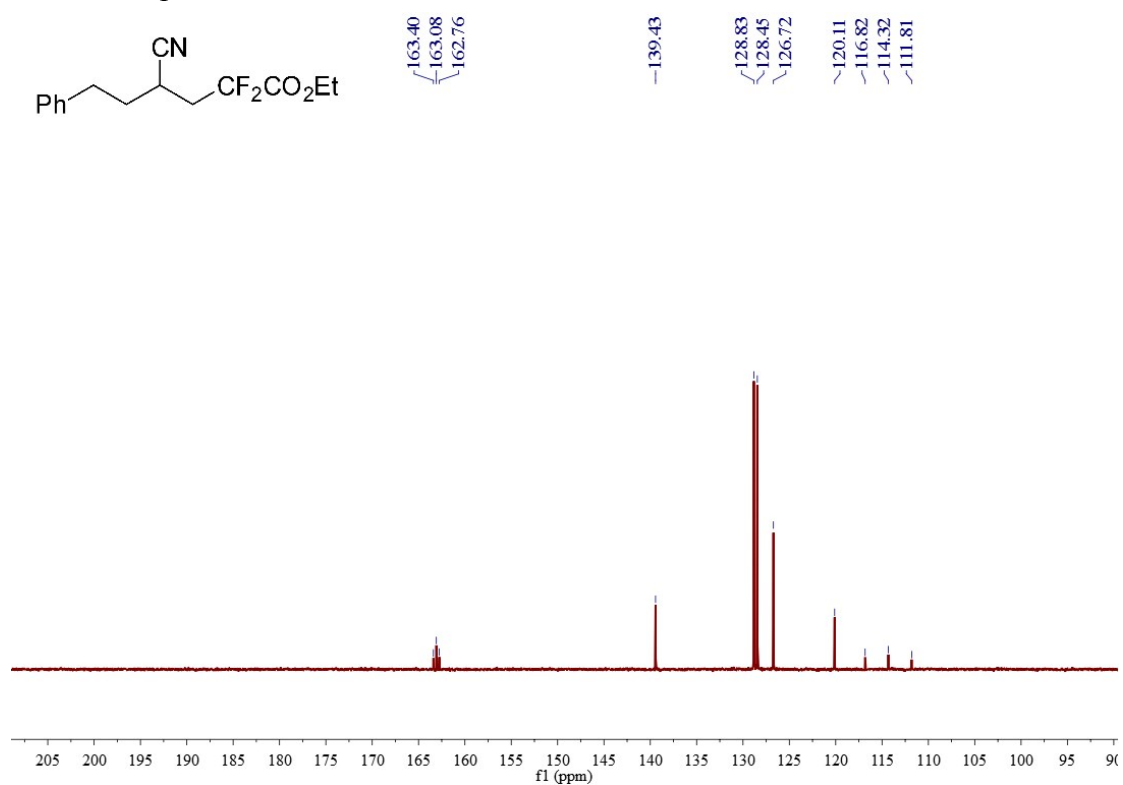

### <sup>1</sup>H NMR Spectrum of **4v**

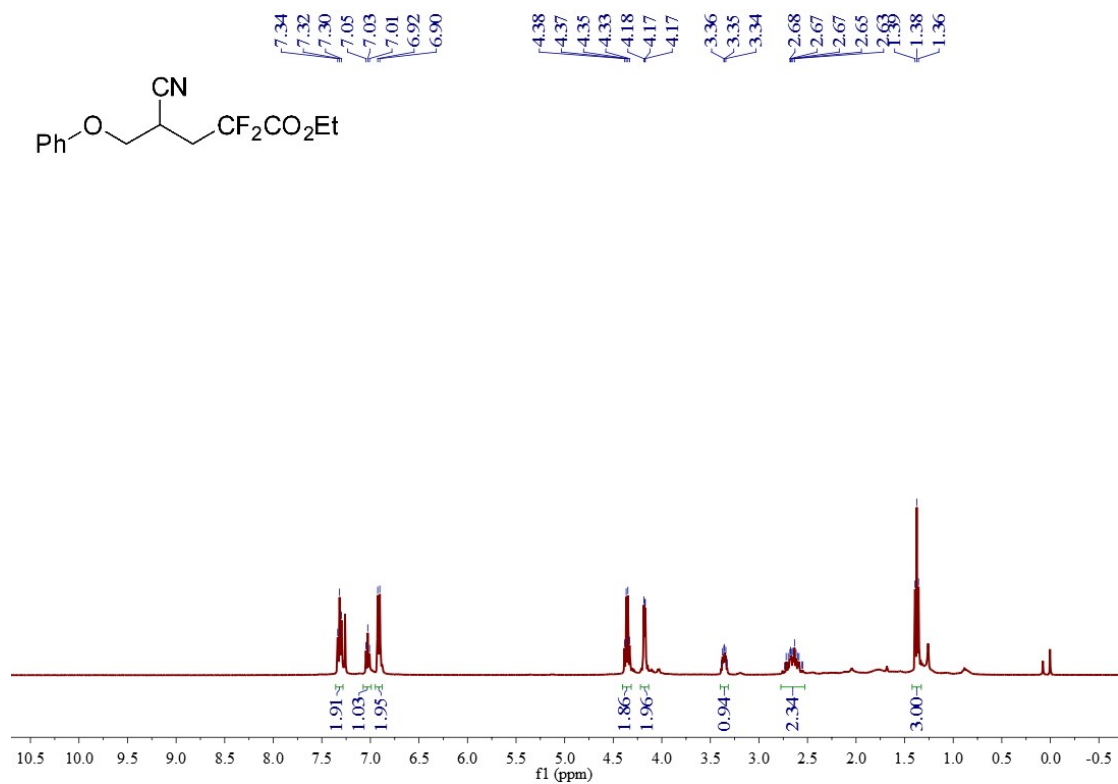



### <sup>19</sup>F NMR Spectrum of 4v

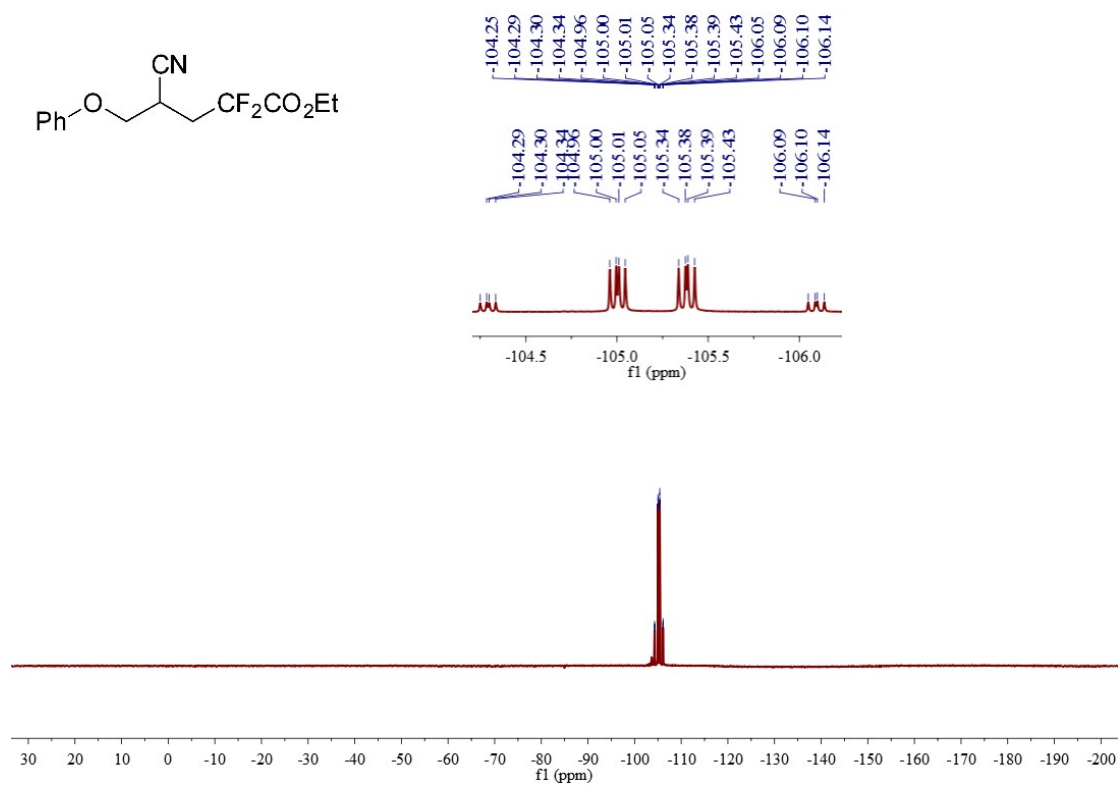

### <sup>13</sup>C NMR Spectrum of 4v

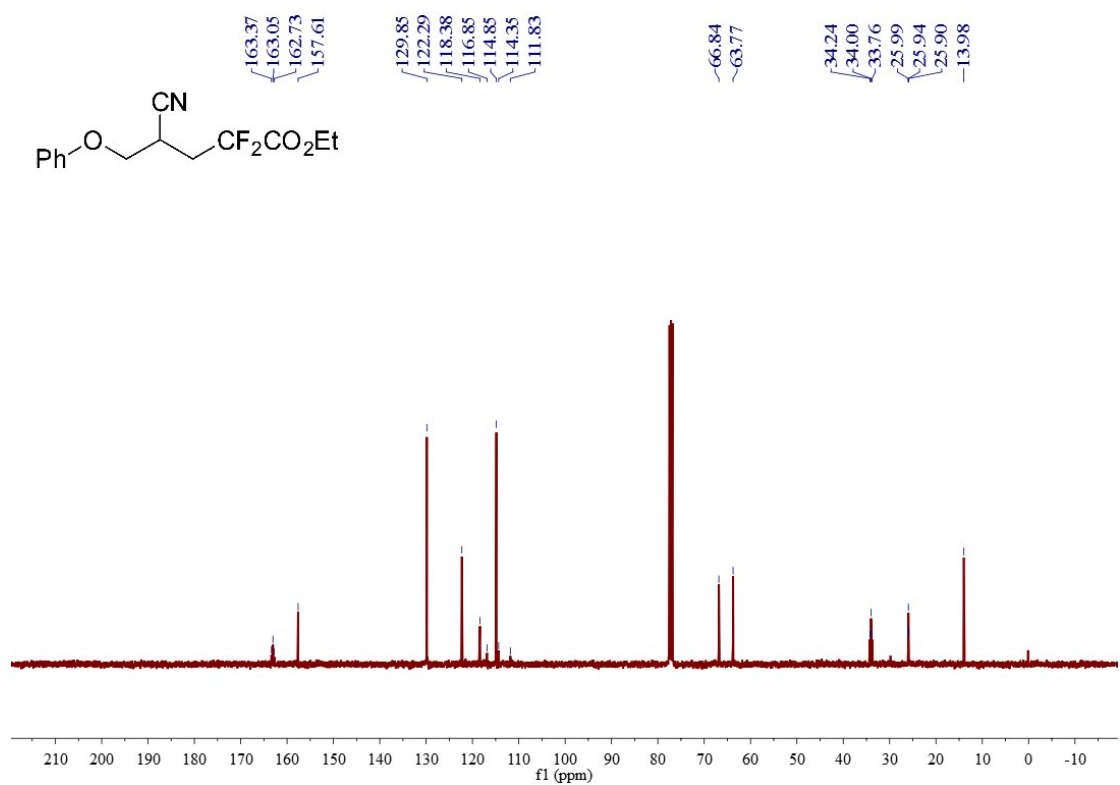

<sup>1</sup>H NMR Spectrum of **4w**

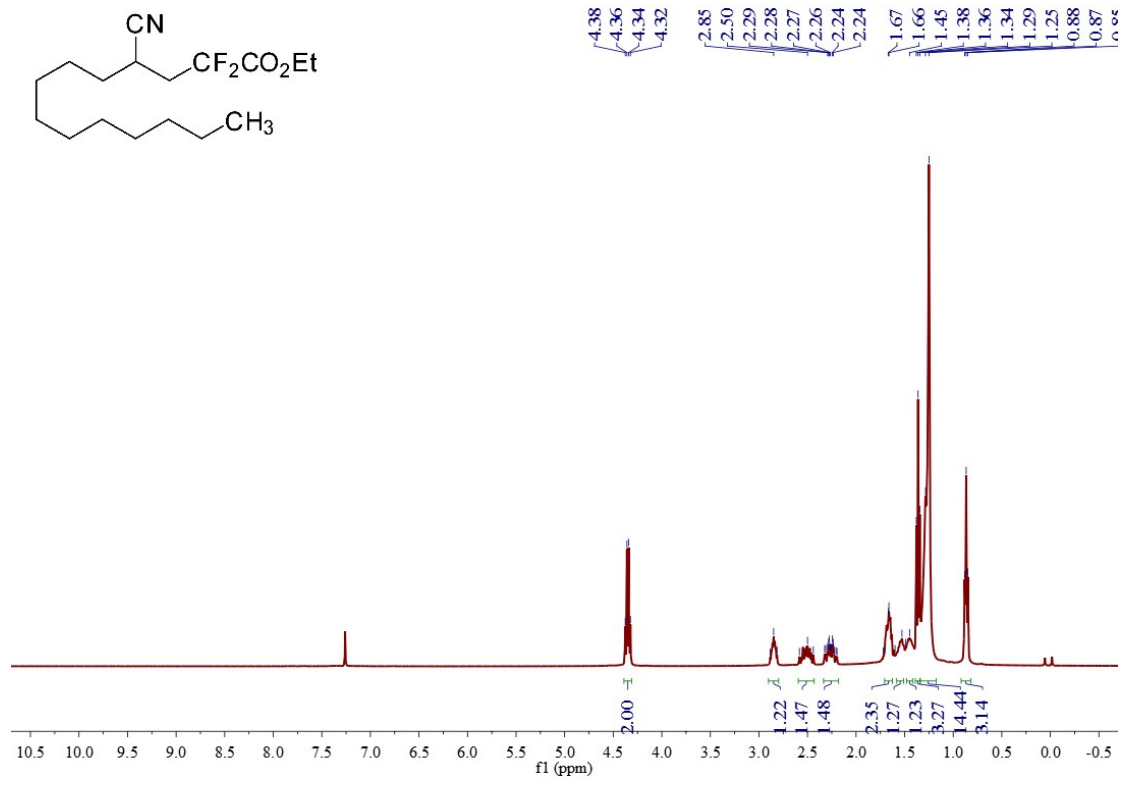

<sup>19</sup>F NMR Spectrum of **4w**

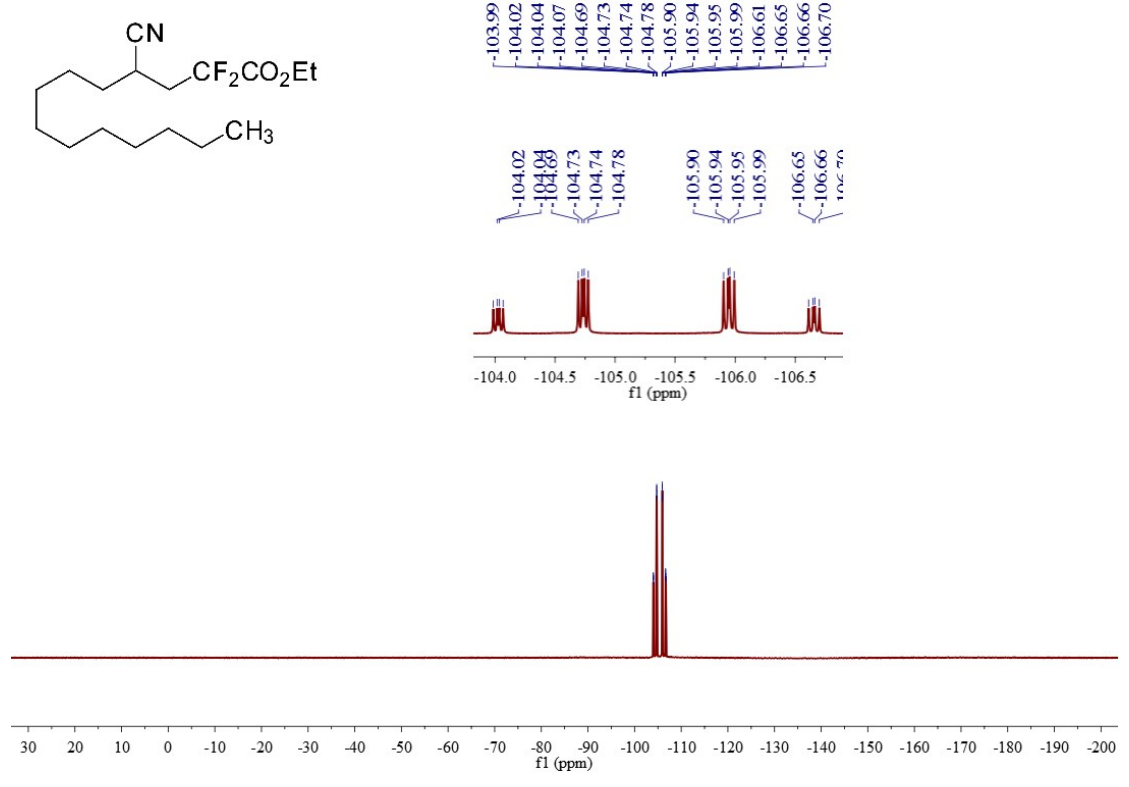

### <sup>13</sup>C NMR Spectrum of 4w

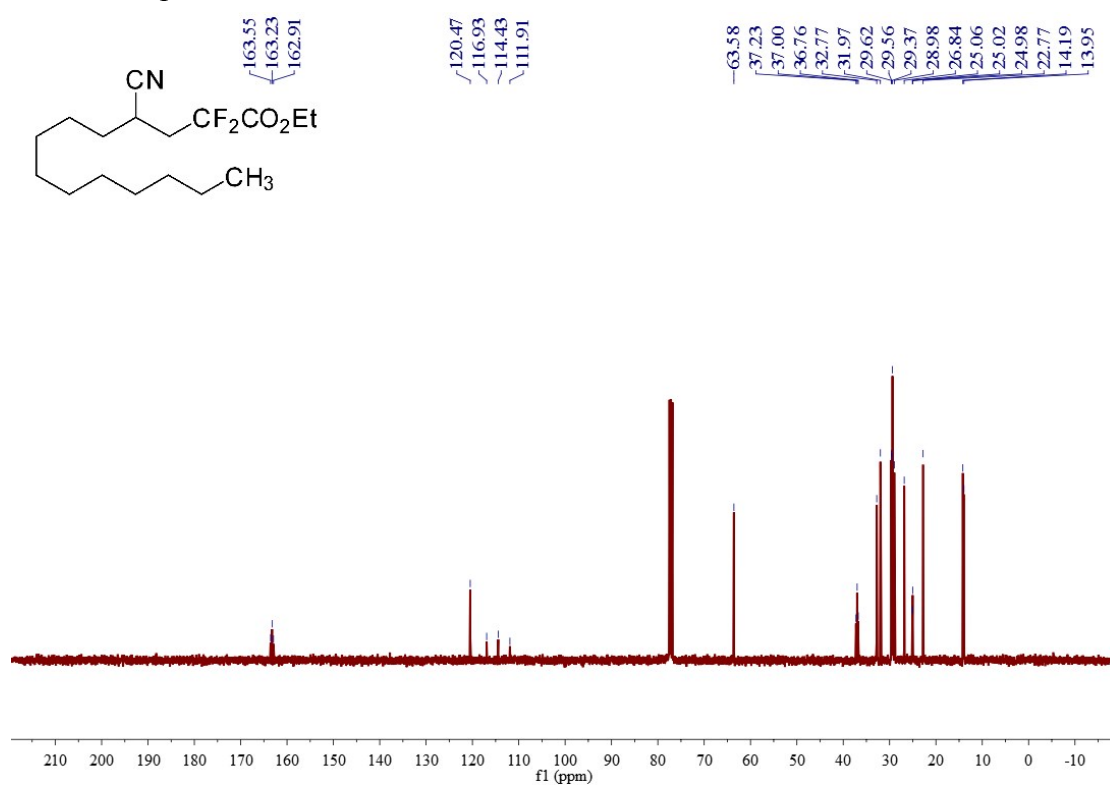

### <sup>1</sup>H NMR Spectrum of 4x

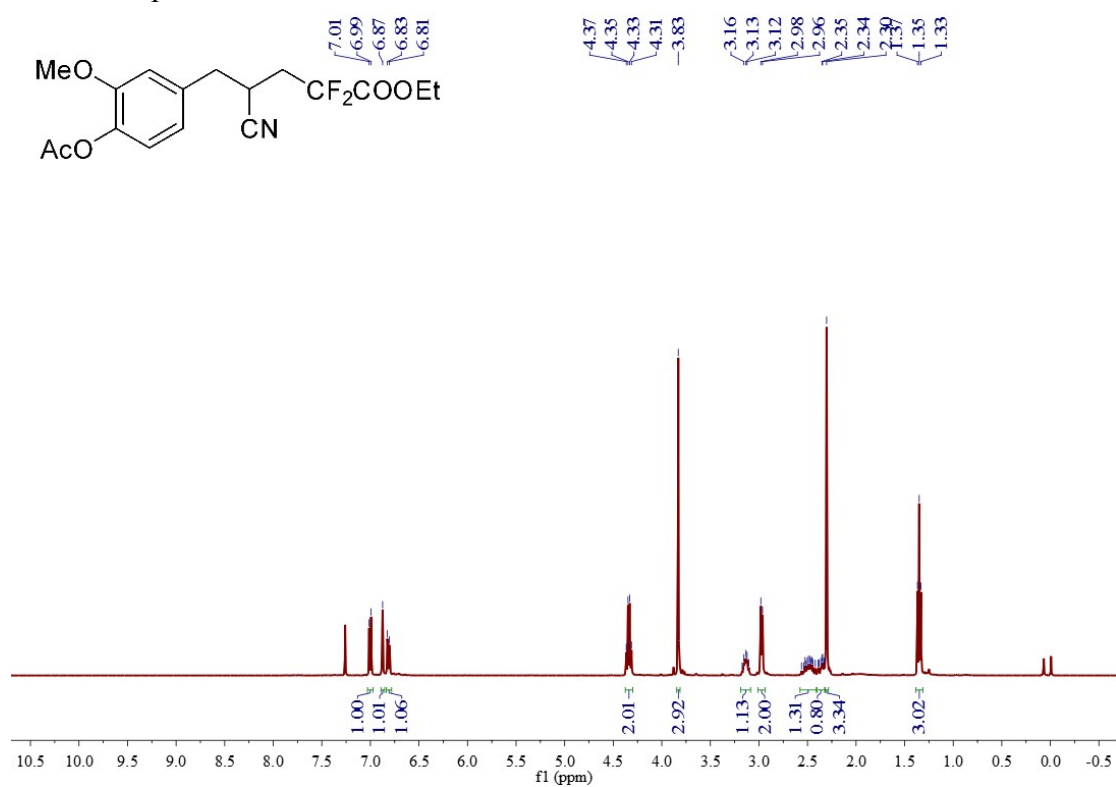

<sup>19</sup>F NMR Spectrum of 4x

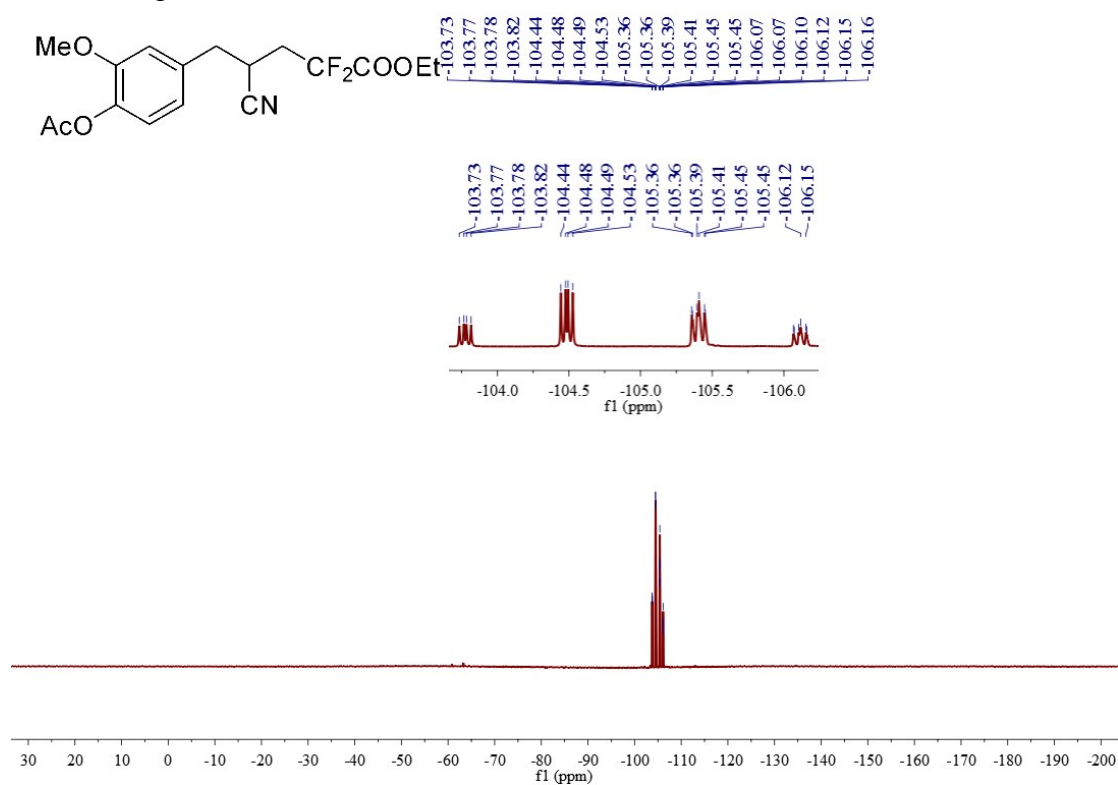

<sup>13</sup>C NMR Spectrum of 4x

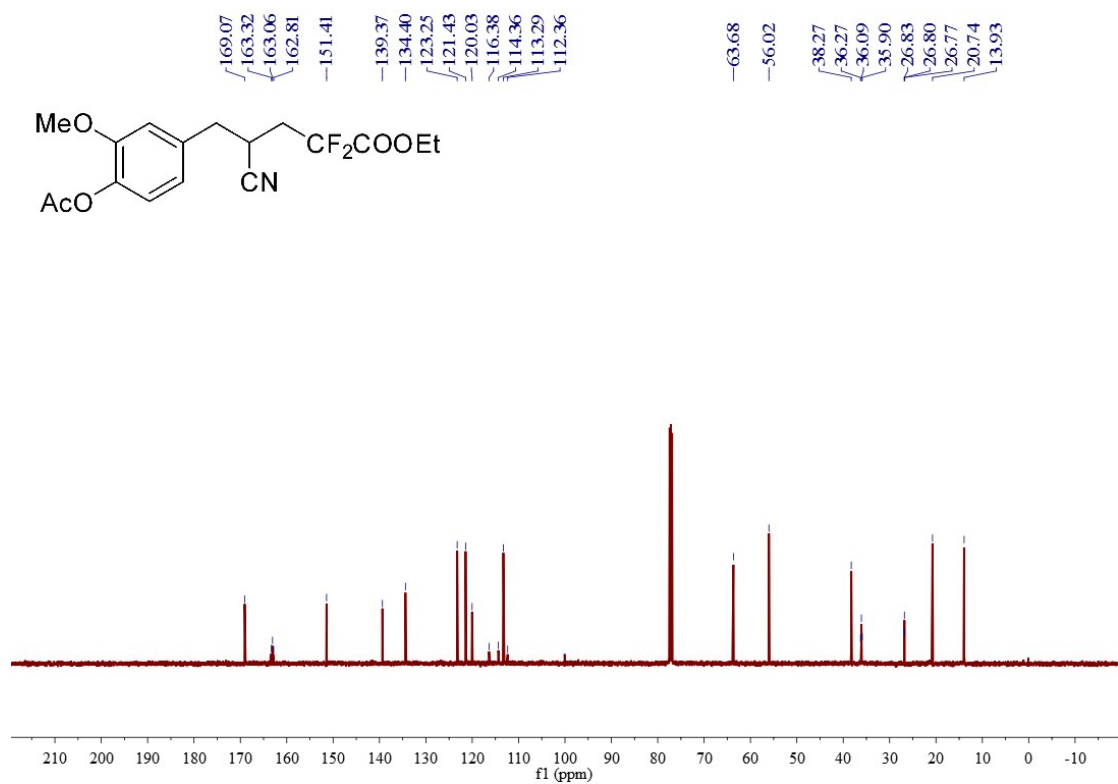

### <sup>1</sup>H NMR Spectrum of 4y

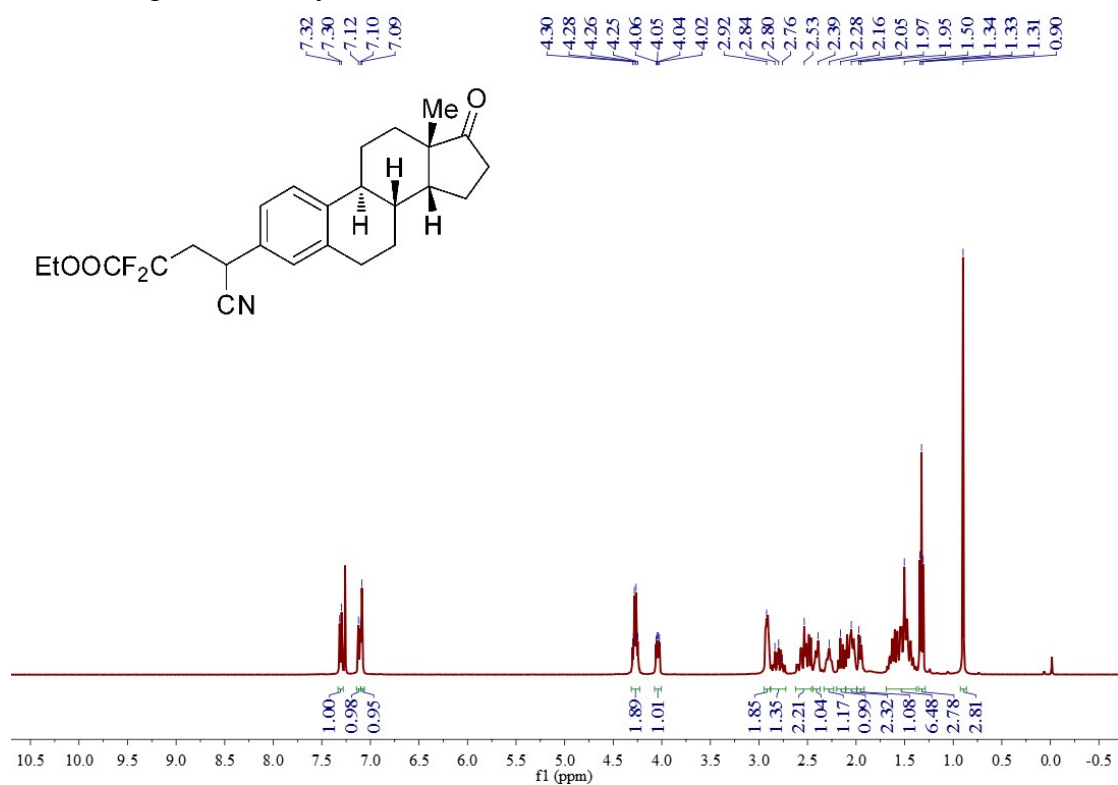

### <sup>19</sup>F NMR Spectrum of 4y

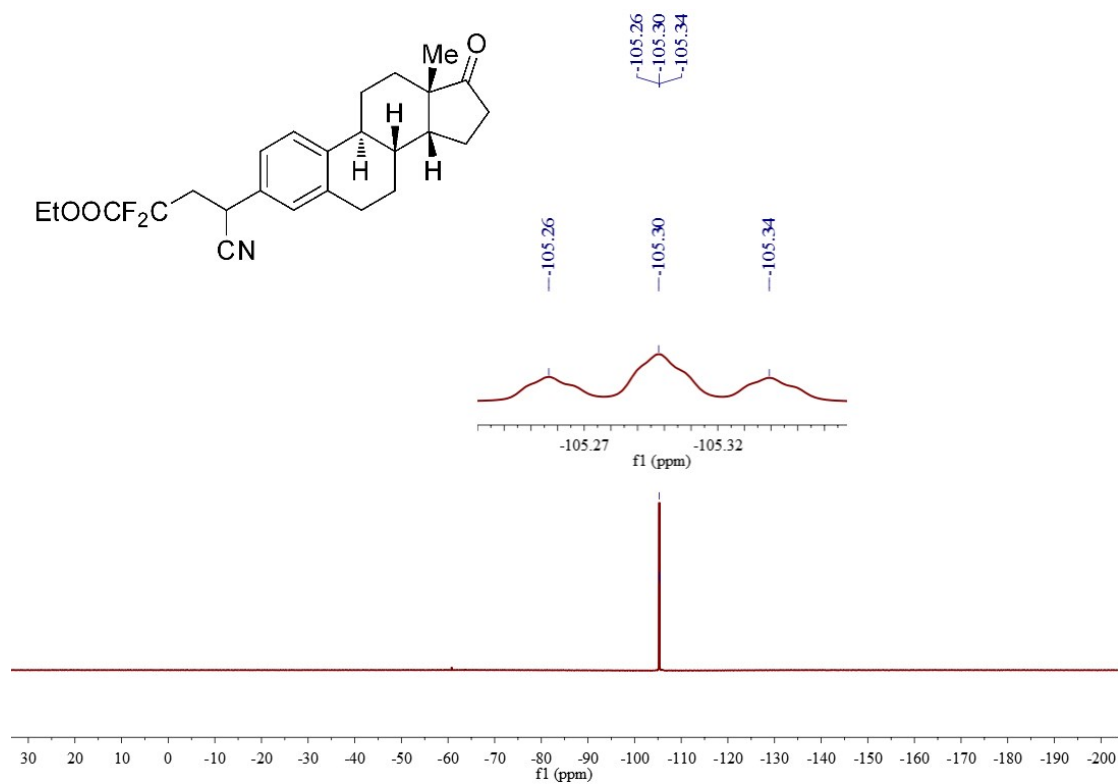

### <sup>13</sup>C NMR Spectrum of 4y

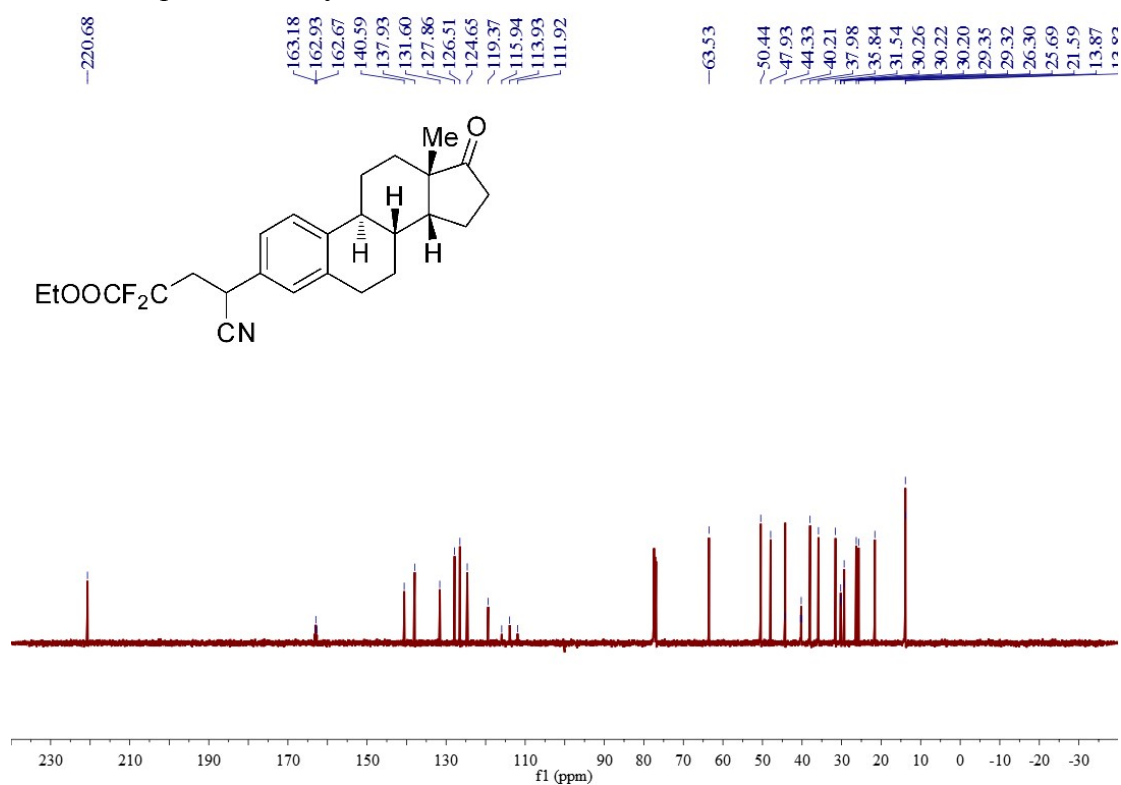

### <sup>1</sup>H NMR Spectrum of 3a

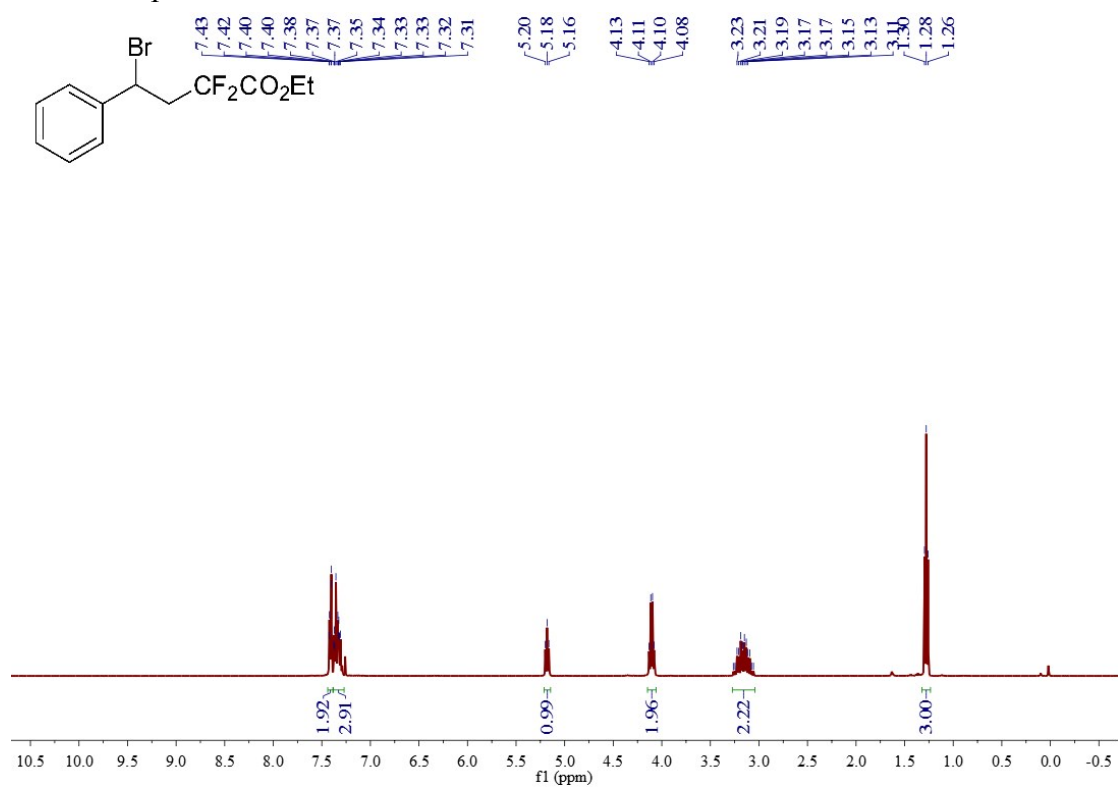

### <sup>19</sup>F NMR Spectrum of **3a**

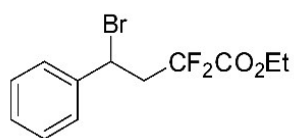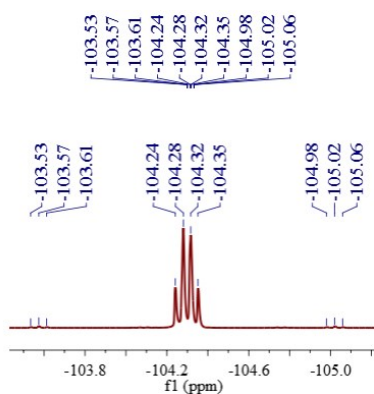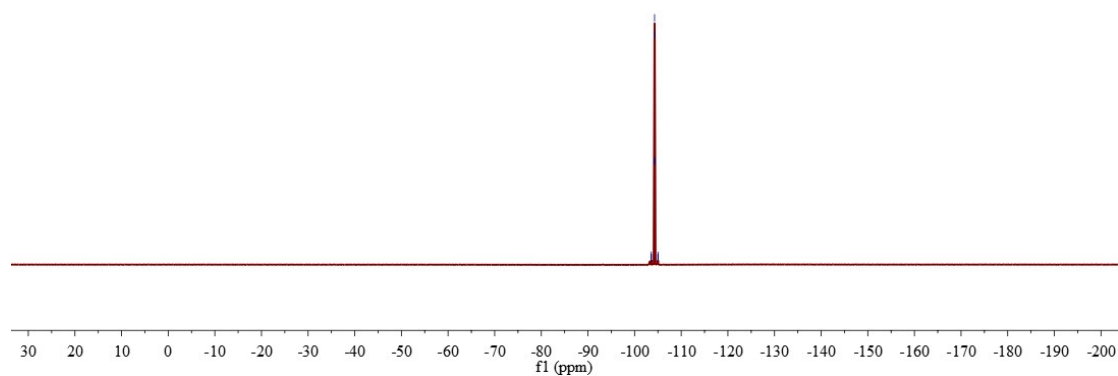

### <sup>13</sup>C NMR Spectrum of **7a**

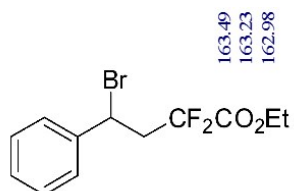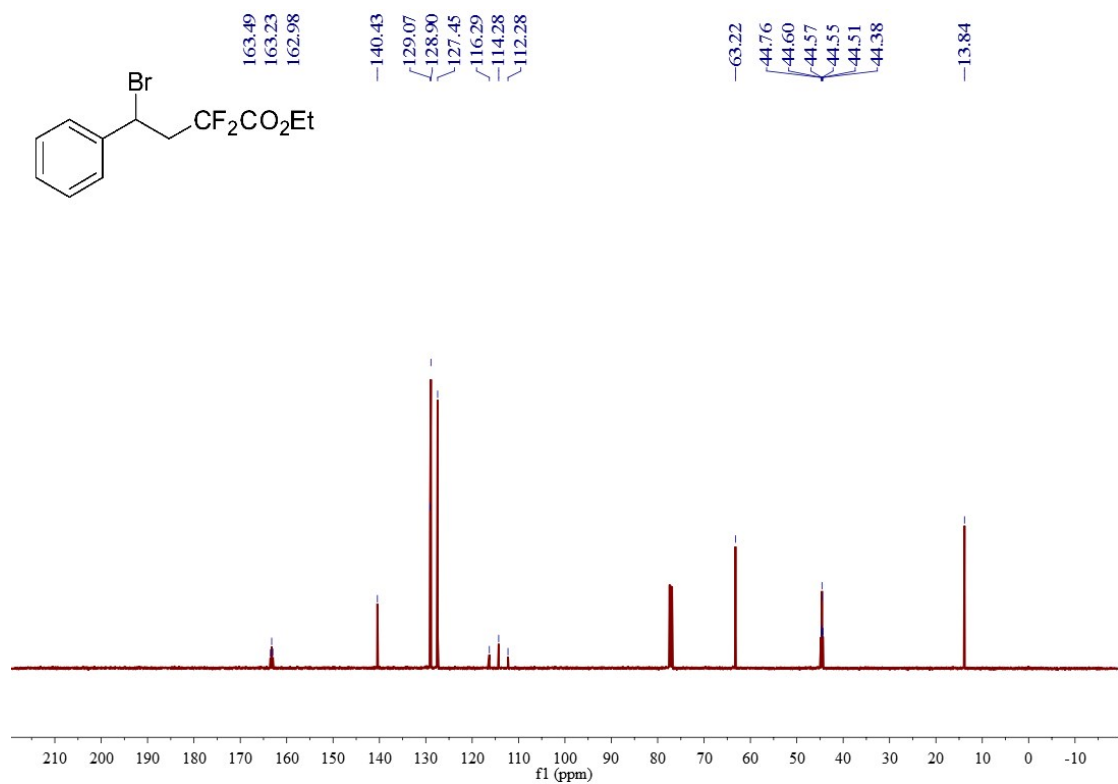

### <sup>1</sup>H NMR Spectrum of 7a

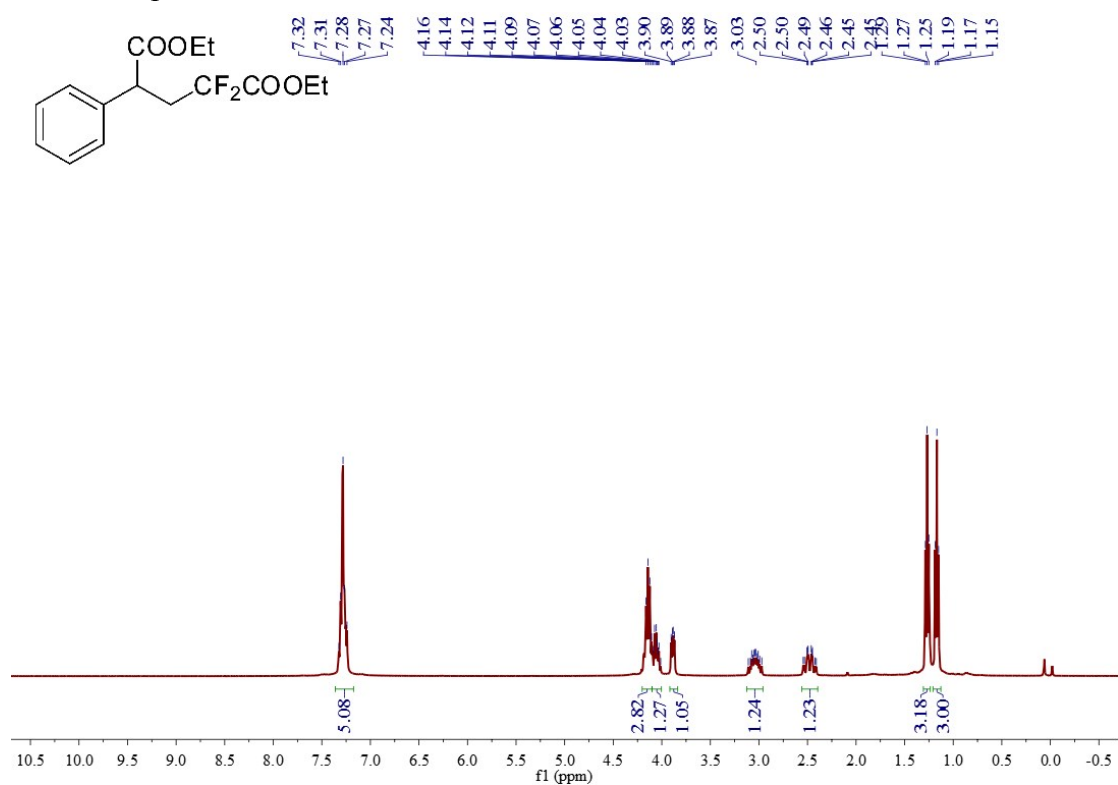

### <sup>19</sup>F NMR Spectrum of 7a

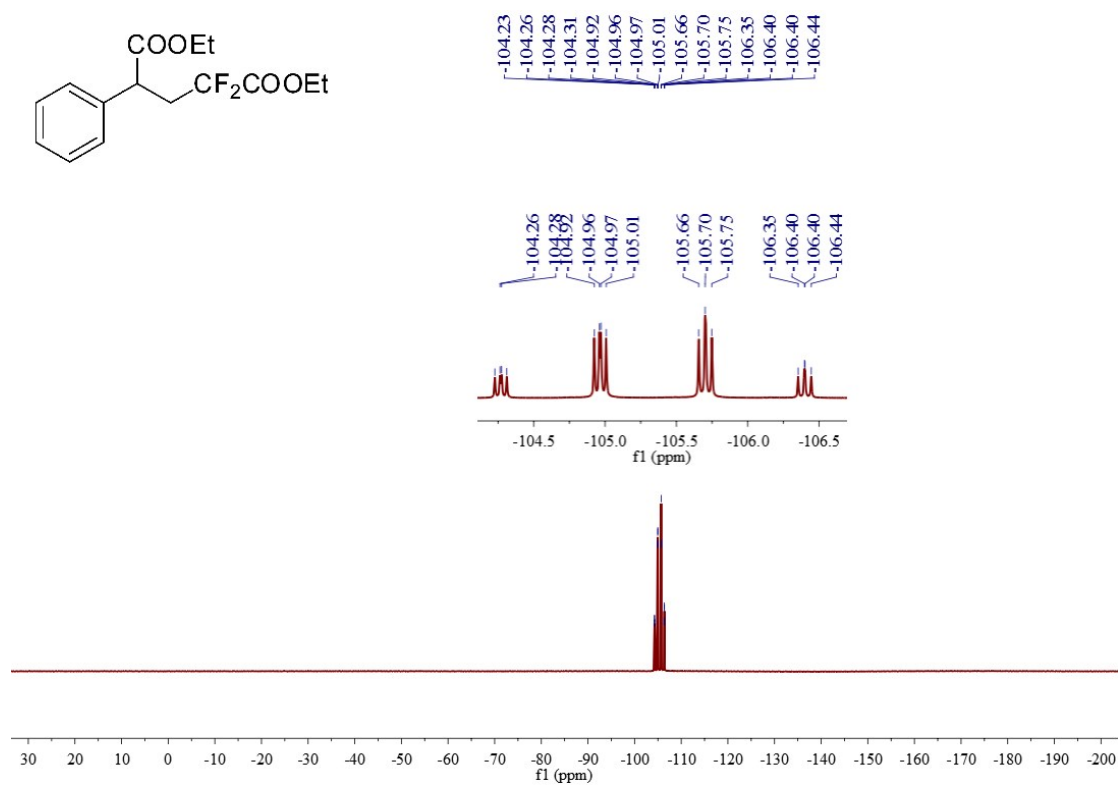



<sup>13</sup>C NMR Spectrum of **7a**

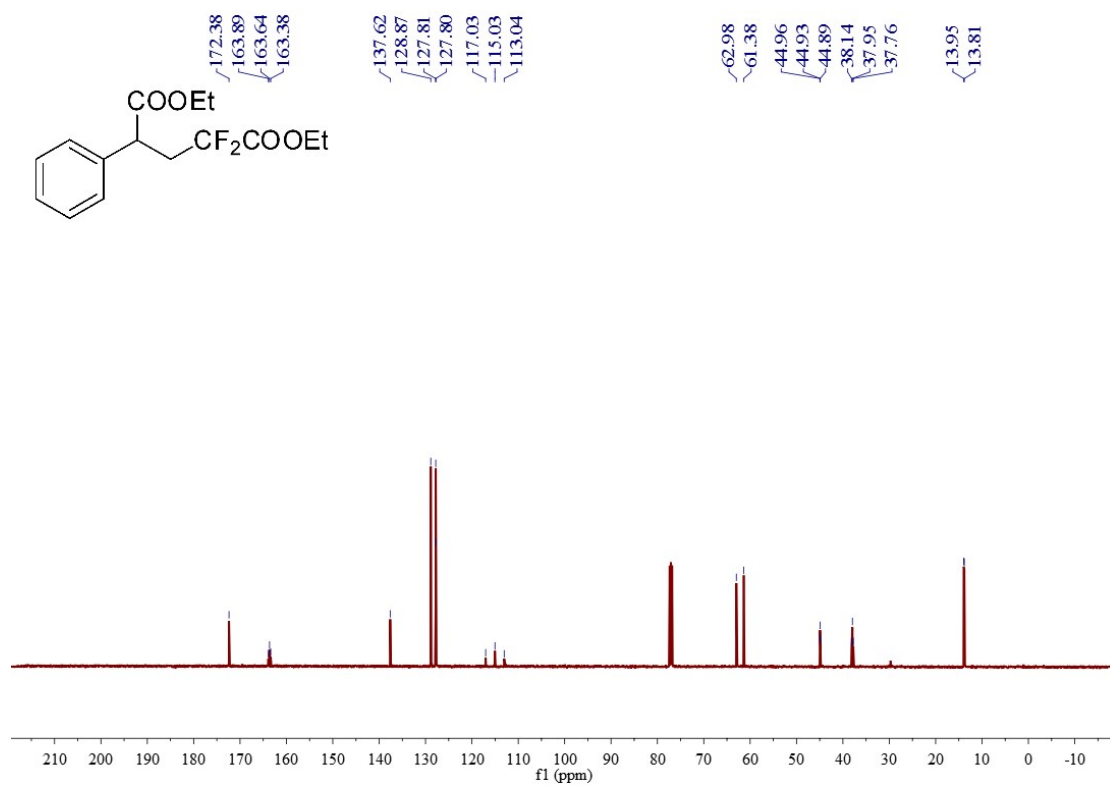

<sup>1</sup>H NMR Spectrum of **7b**

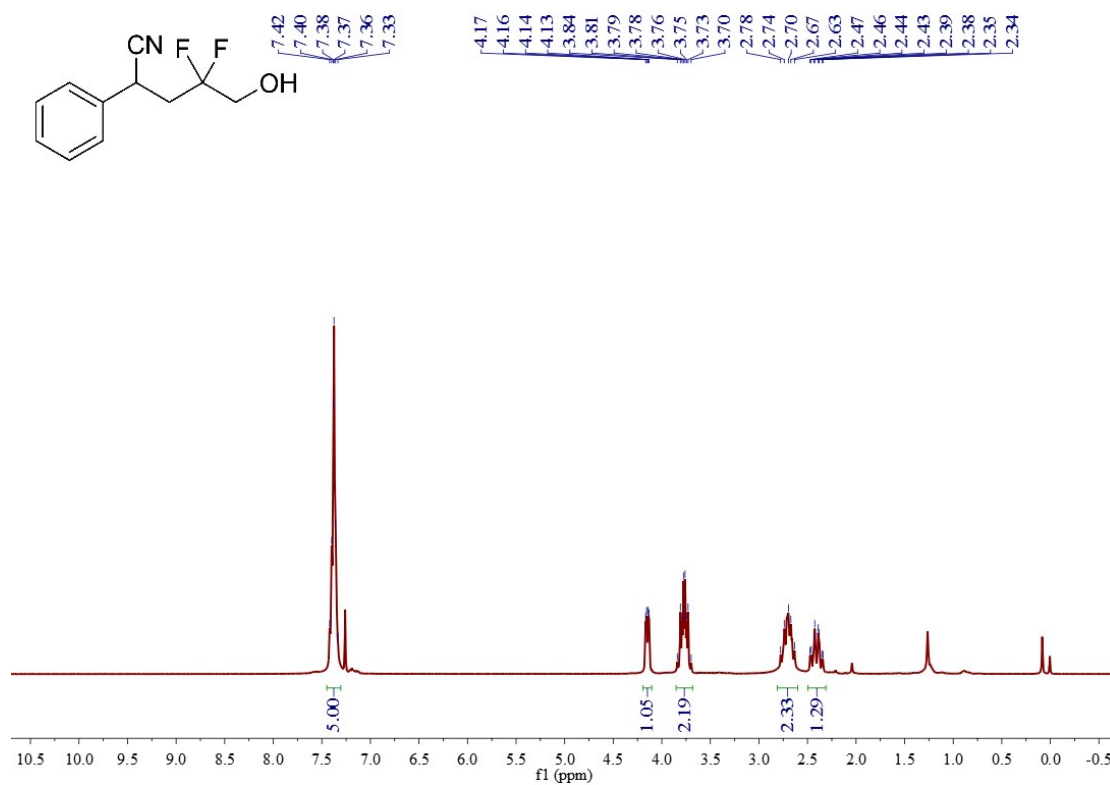

### <sup>19</sup>F NMR Spectrum of **7b**

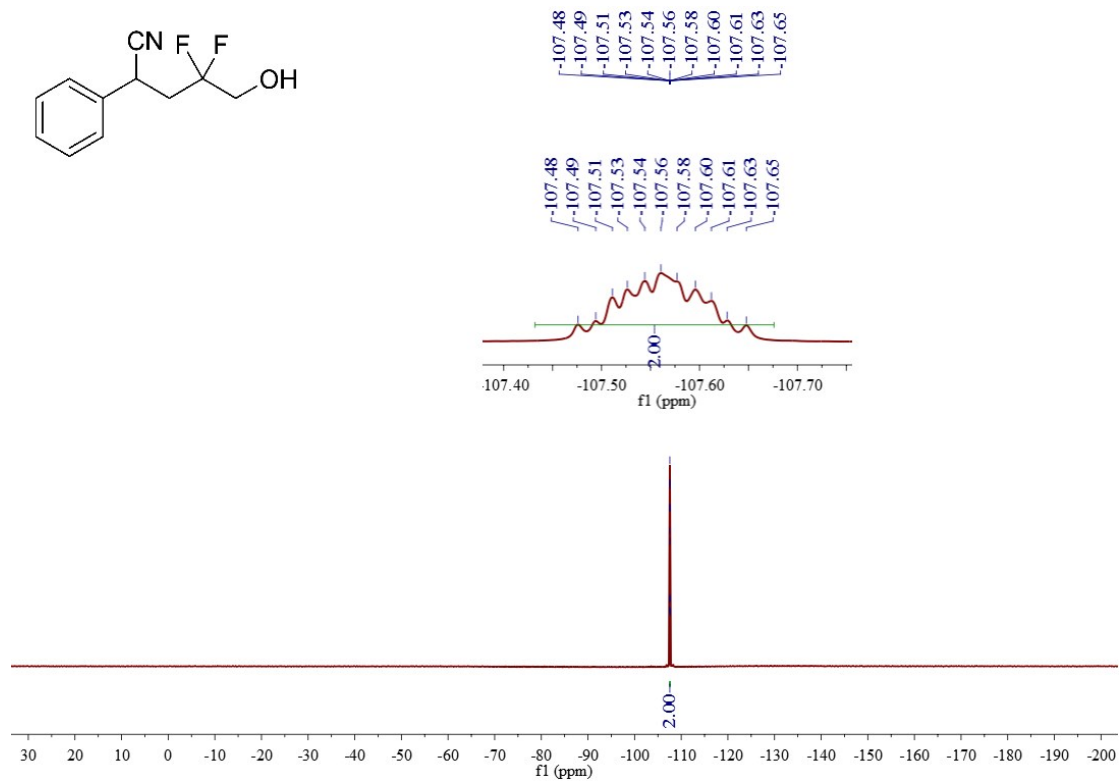

### <sup>13</sup>C NMR Spectrum of **7b**

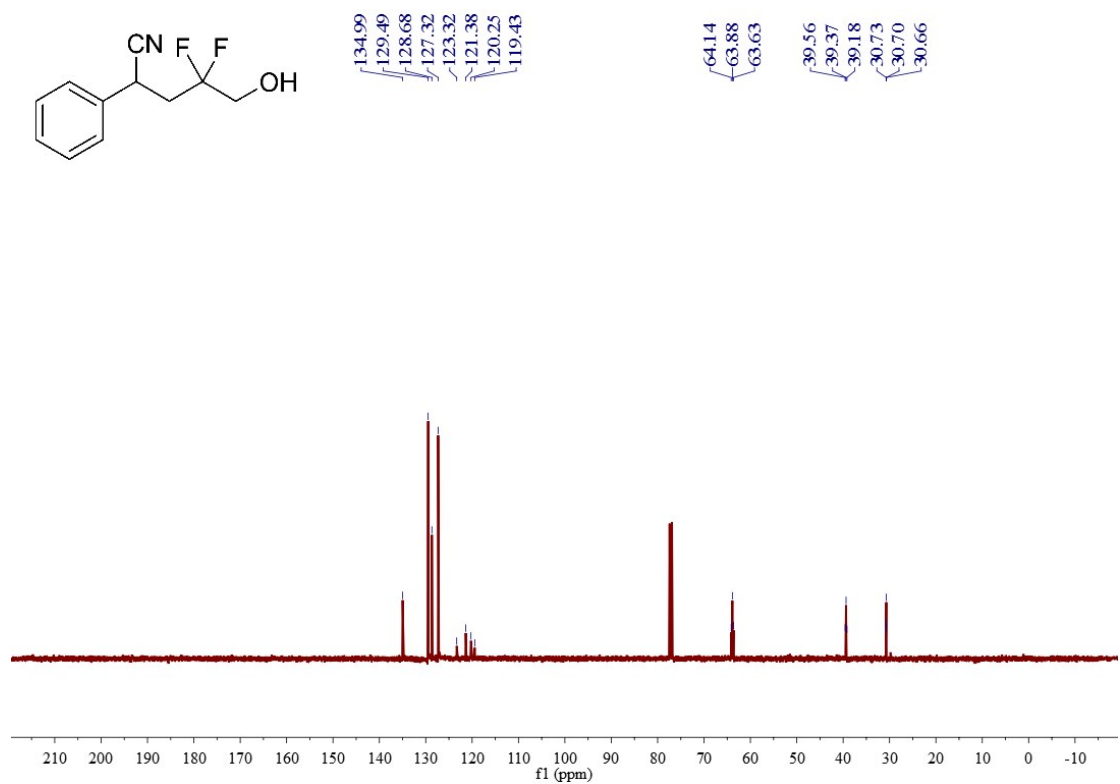

### <sup>1</sup>H NMR Spectrum of 7c

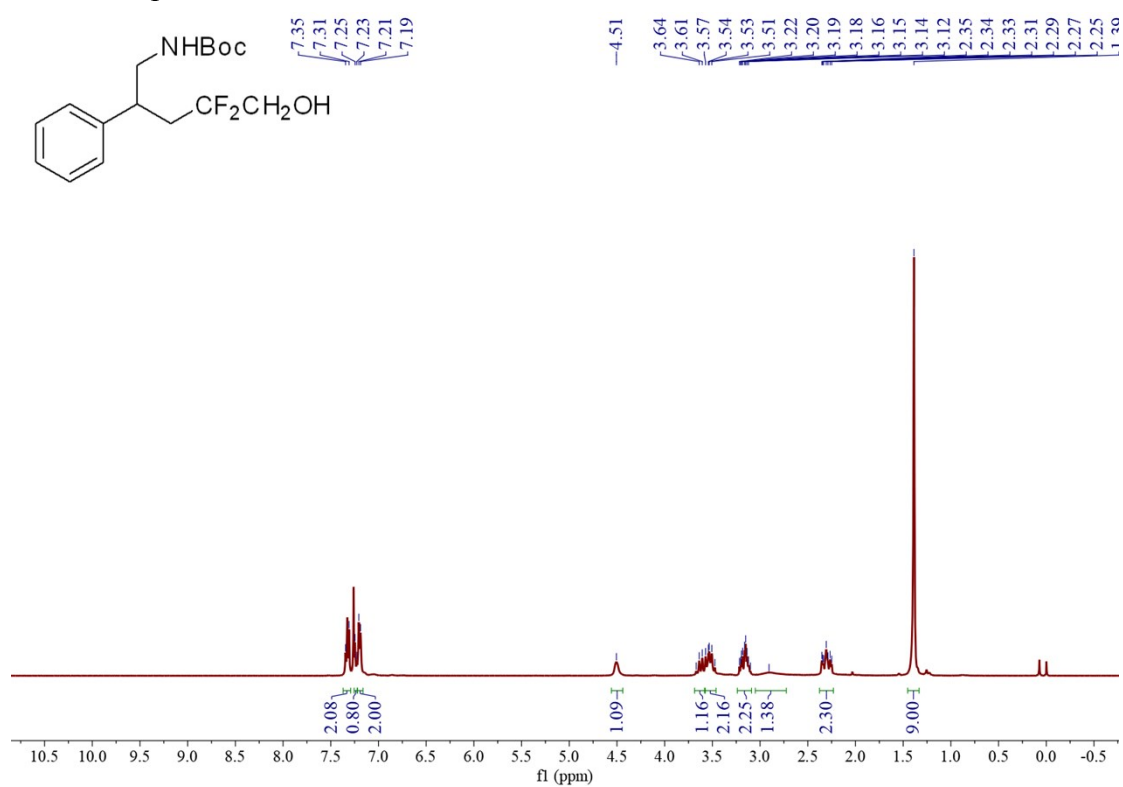

### <sup>19</sup>F NMR Spectrum of 7c

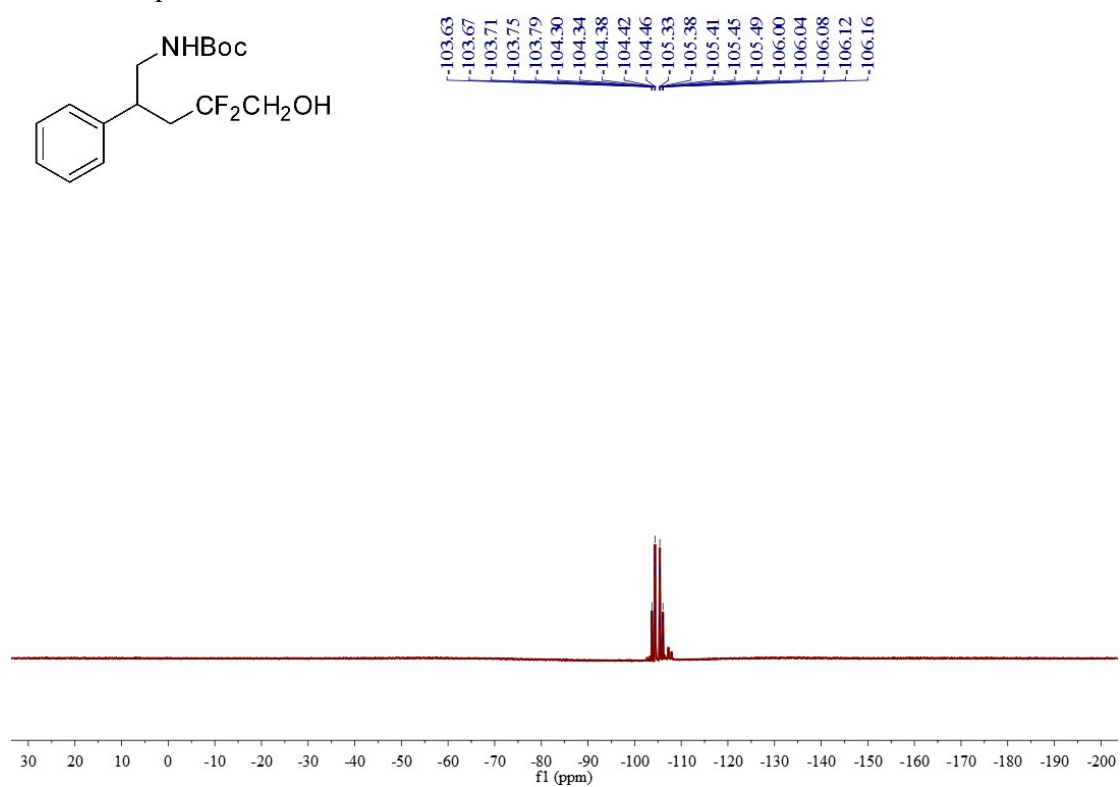

<sup>13</sup>C NMR Spectrum of 7c

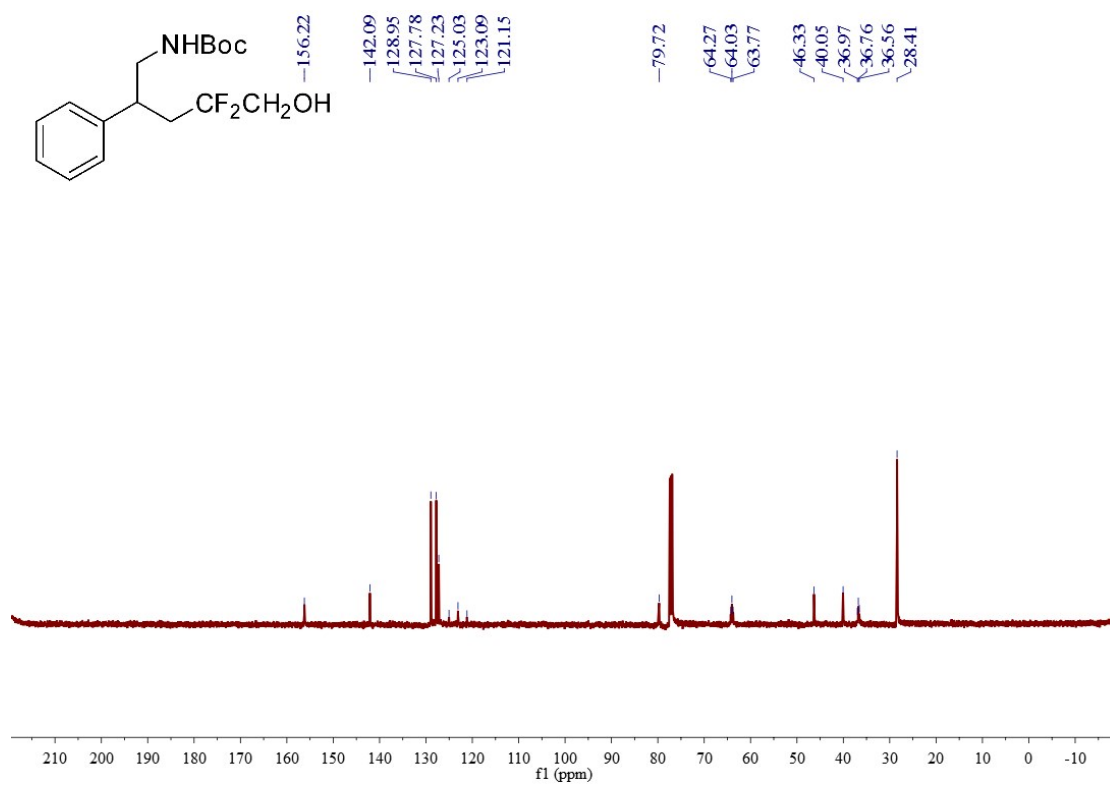

Supplement: d1cc00160d1.pdf [file d1cc00160d1.pdf]
